# Supplementary material for: Proteome wide reduction in AGE modification in streptozotocin induced diabetic mice by hydralazine mediated transglycation
Source: PubMed Central journal article supplement — Sci Rep. 2013 Oct 15;3:2941. doi: 10.1038/srep02941 (PMC3796742; doi:10.1038/srep02941), 2013-10-15
Supplement: srep02941-s1.pdf [file srep02941-s1.pdf]

# **Proteome wide reduction in AGE modification in STZ induced diabetic mice by hydralazine mediated transglycation**

**Suresh K Kesavan<sup>1</sup>, Shweta Bhat<sup>1</sup>, Sandeep B Golegaonkar<sup>1</sup>, Mashanipalya G Jagadeeshaprasad<sup>1</sup>, Arati B Deshmukh<sup>1</sup>, Harshal S Patil<sup>1</sup>, Santosh D Bhosale<sup>1</sup>, Mahemud L. Shaikh<sup>2</sup>, Hirekodathakallu V Thulasiram<sup>1</sup>, Ramanamurthy Boppana<sup>2</sup>, Mahesh J Kulkarni<sup>1\*</sup>**

**1- Proteomics Facility, Division of Biochemical Sciences, CSIR-National Chemical Laboratory,**

**Pune-411008, India.**

**2- National Center for Cell Science, Pune, India**

## Supplementary Fig 1:

Fluorescence emission spectra of glycated AGE modified HSA at  $\lambda_{ex}$  370 nm. The fluorescence emission profiles resulted from drug treated HSA shows decrease in AGE fluorescence. Hydralazine shows more potent inhibition than Aminoguanidine.

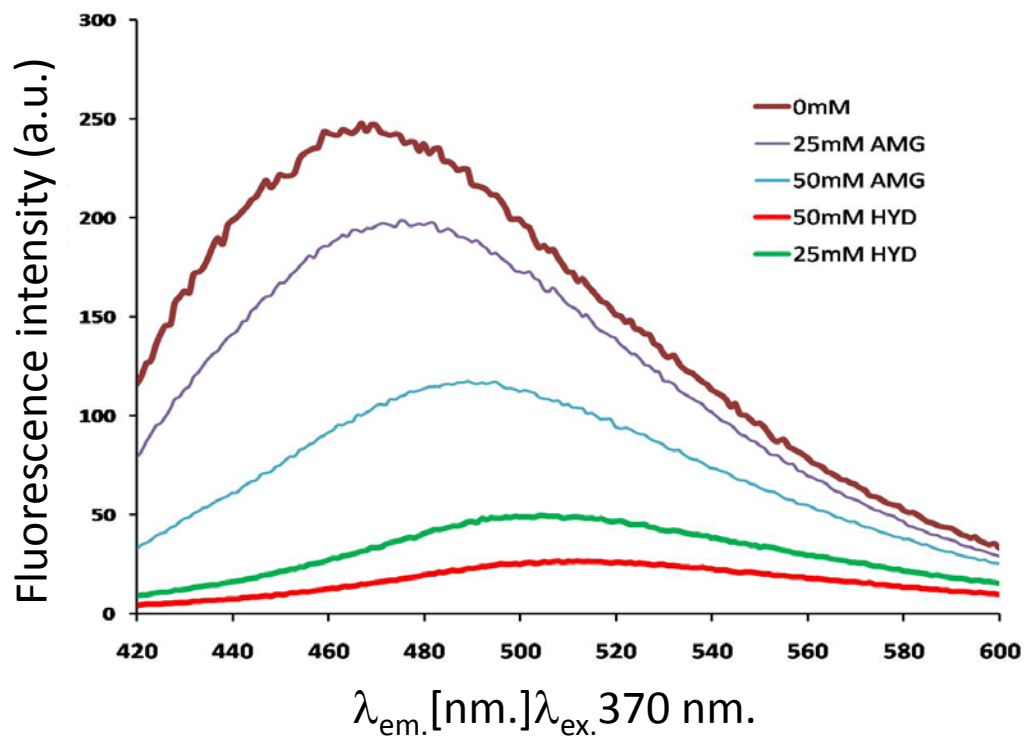

# Supplementary Fig 2.

Representative Annotation of AGE modified peptide

Fig 2a. Annotation of AGE modified peptide in comparison with unmodified peptide

## UNMODIFIED PEPTIDE 397-413 (K)VFDEFKPLVEEPQNLIK(Q)

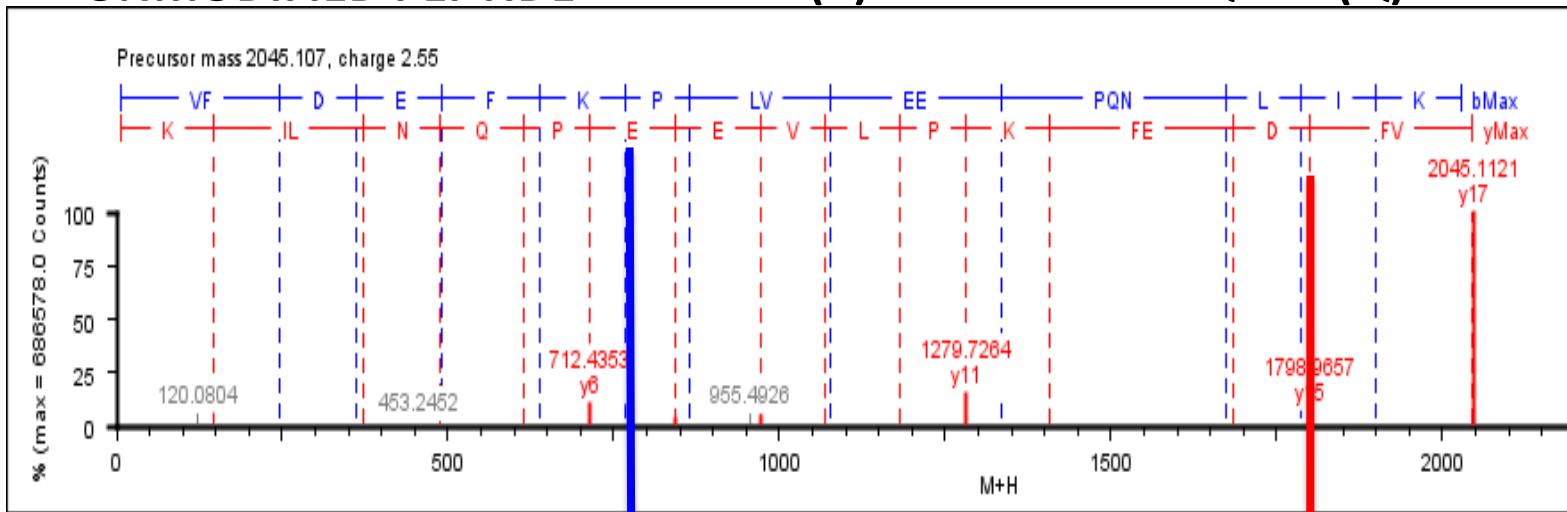

$\Delta M = 58.0055$  Dalton

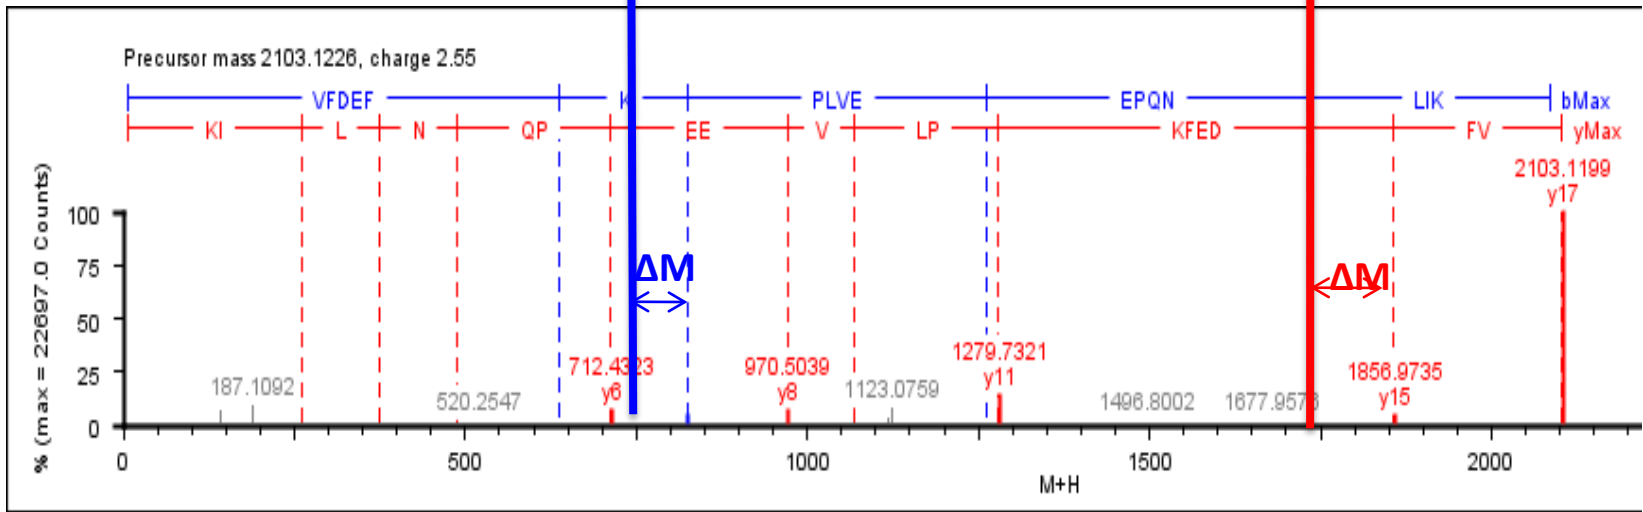

## MODIFIED PEPTID B97-413 (K)VFDEFK(CML)PLVEEPQNLIK(Q) CML (6)

# Supplementary Fig 2b.

Zoomed image of b and y ion showing increase in mass due to modification

**Modified b ion**  $\text{VFDEFK} + \text{CML} - \text{H}_2\text{O} = 784.3875 + 58.0055 - 18.0105 = 824.3780$

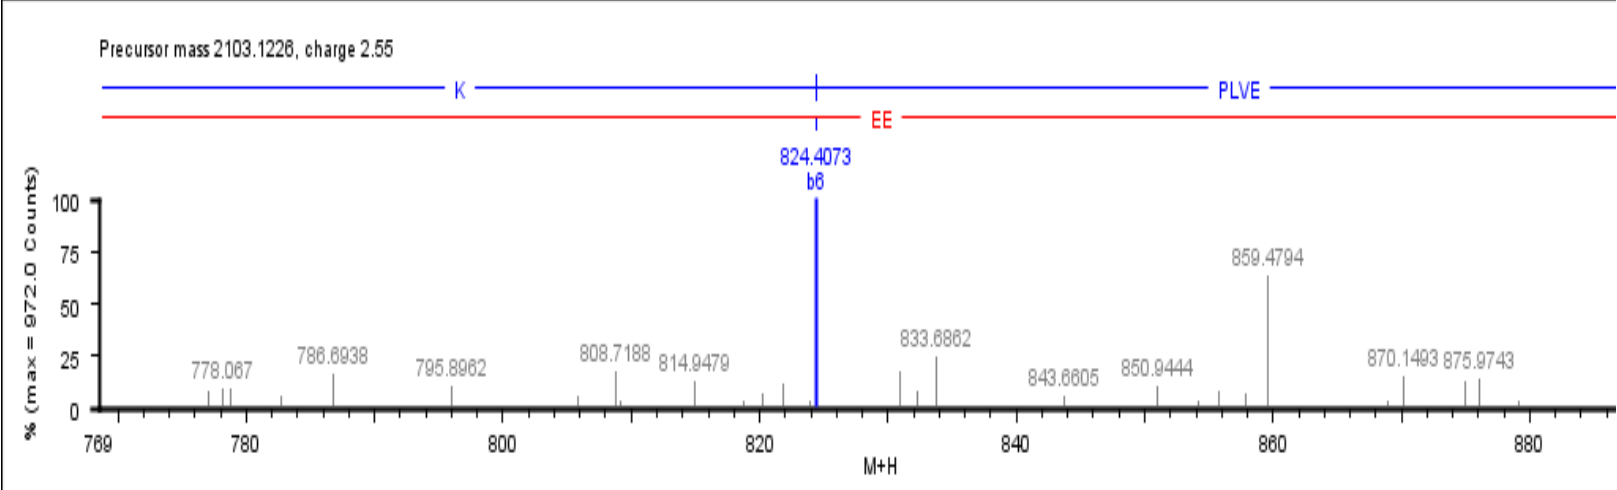

**Modified Y ion**  $\text{DEFKPLVEEPQNLK} + \text{CML} = 1798.9584 + 58.0055 = 1856.9639$

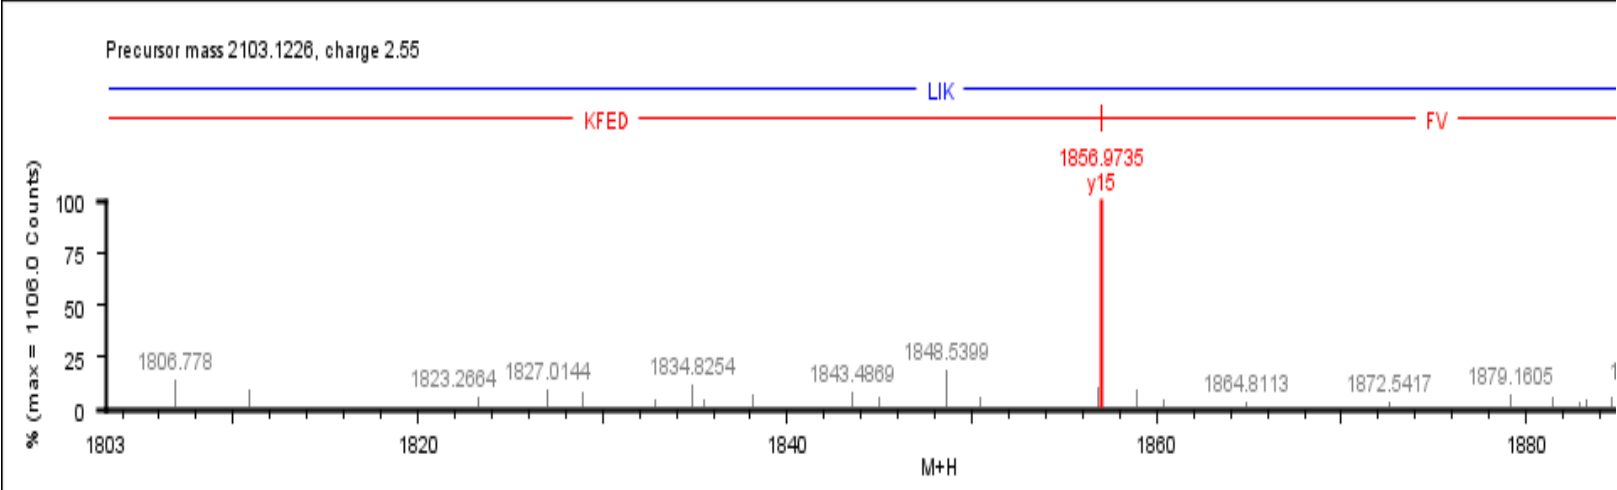

# Supplementary Fig 2c.

Fragment mass error and fragment retention time error of the modified peptide

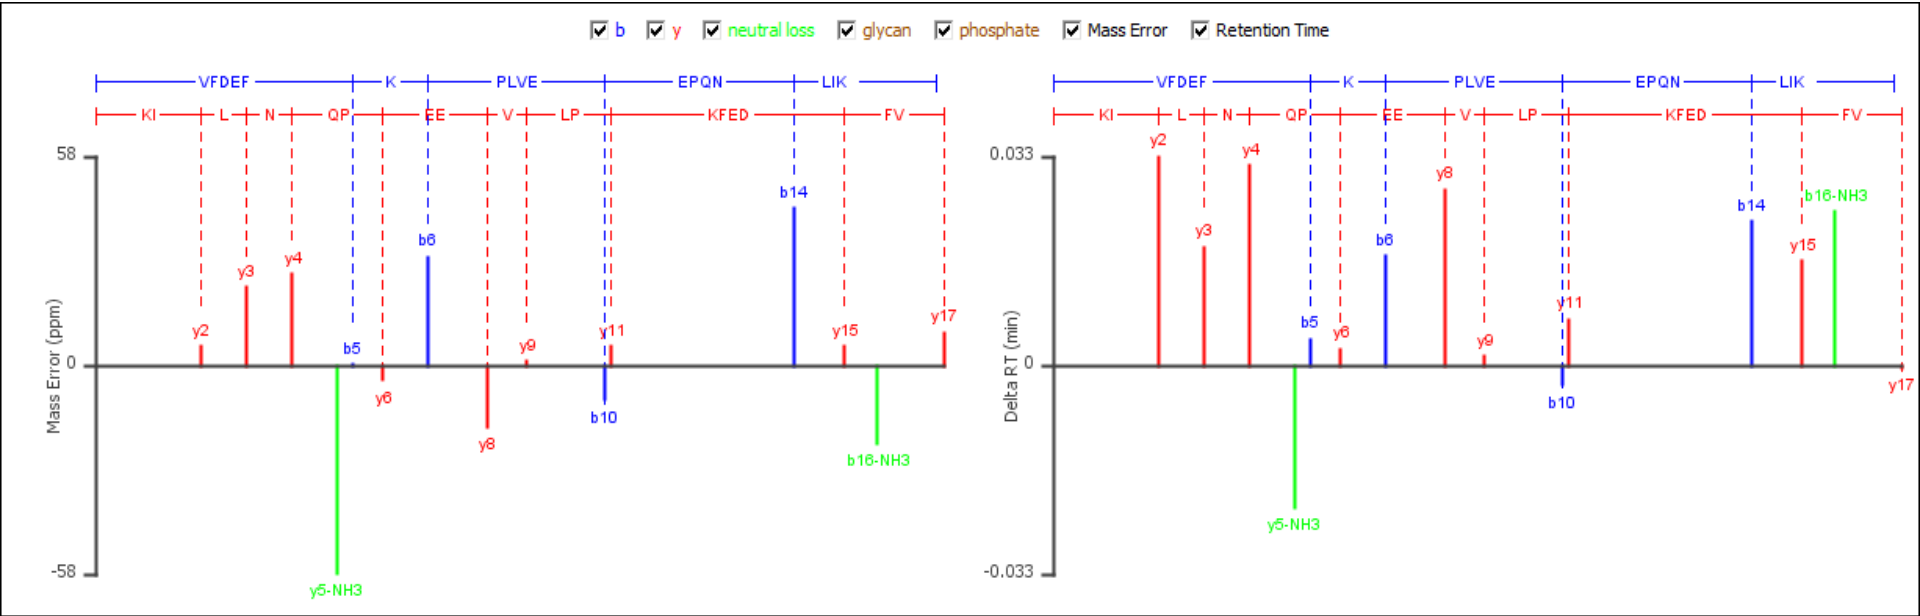

### Supplementary Fig 3:

Heat map analysis of glycation modified peptides of some of the predominant plasma proteins

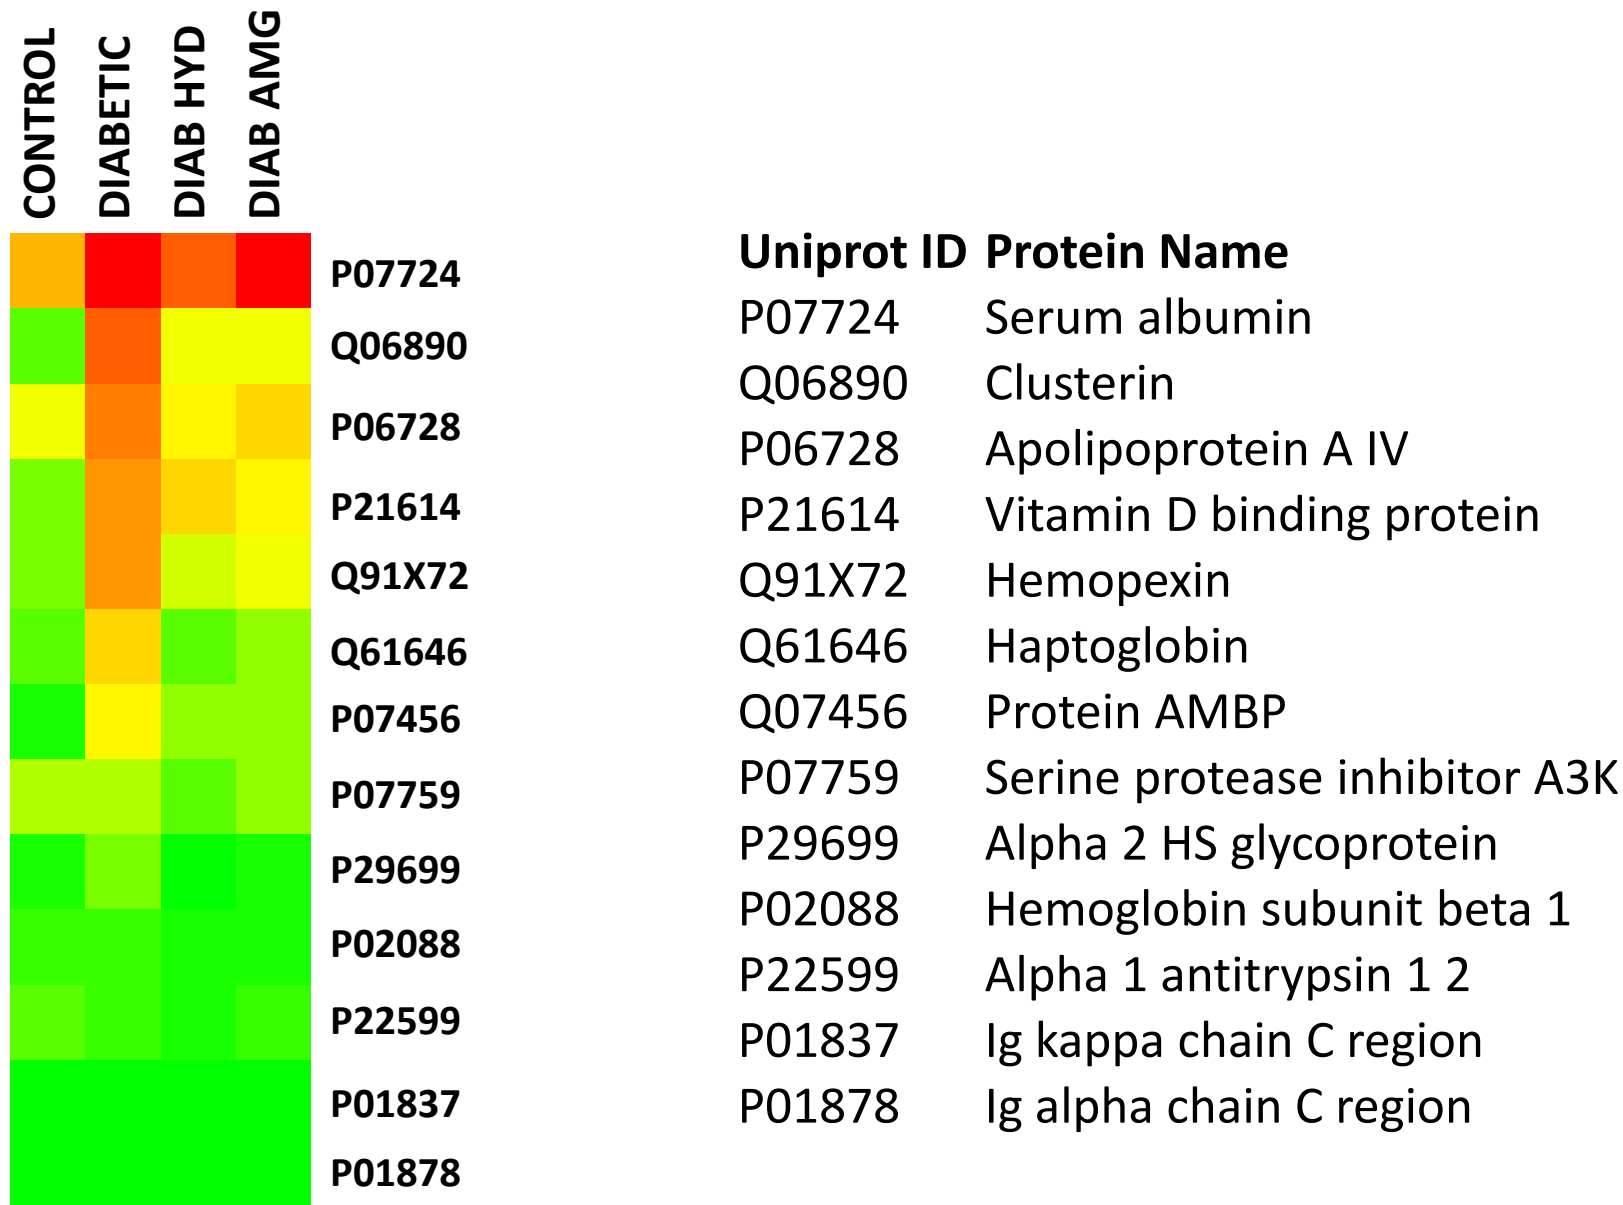

# Supplementary Fig 4a:

## Extracted ion chromatograms Hydralazine <sup>13</sup>C-Glucose conjugate

RT: 0.00 - 20.01 SM: 15G

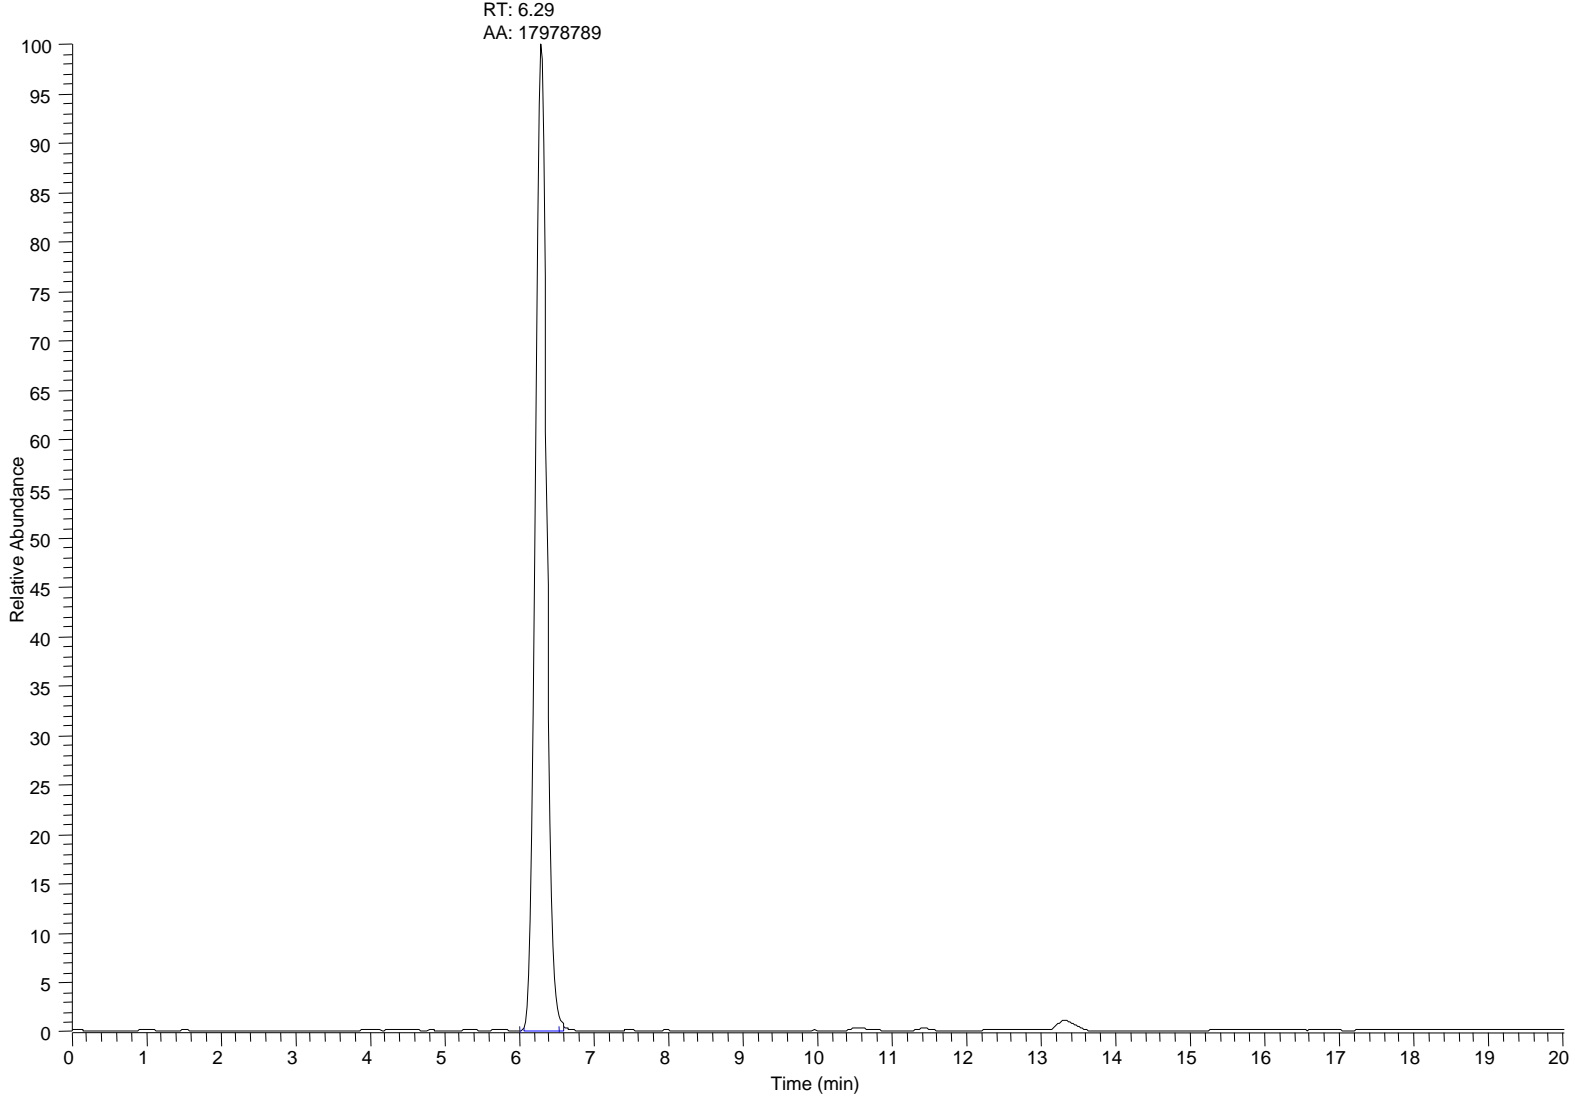

# Supplementary Fig 4b:

## Mass spectra of Hydralazine <sup>13</sup>C-Glucose conjugate

hglg\_1da\_11 #2114 RT: 6.31 AV: 1 NL: 9.37E5  
F: FTMS + p ESI Full ms2 324.13@hcd35.00 [50.00-680.00]

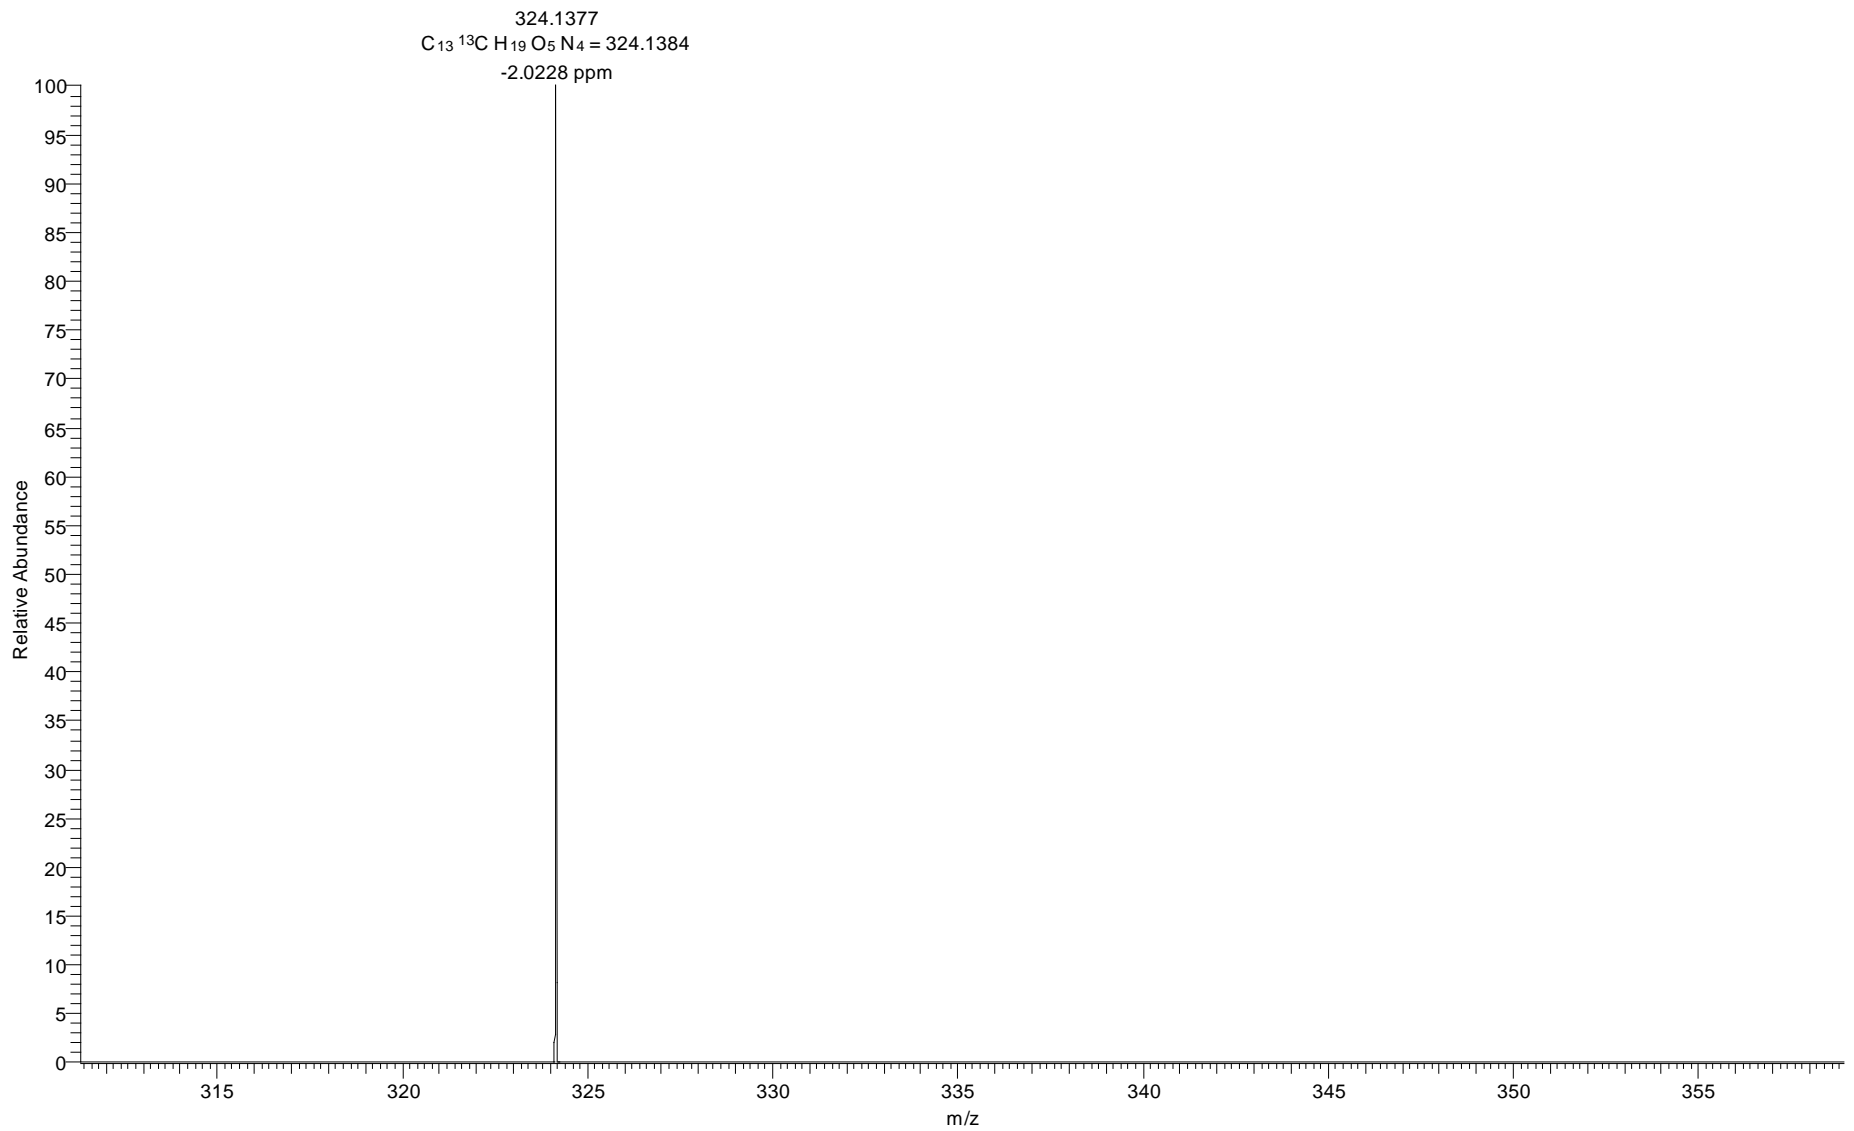



# Supplementary Fig 4c:

Extracted ion chromatograms Hydralazine glucose conjugate

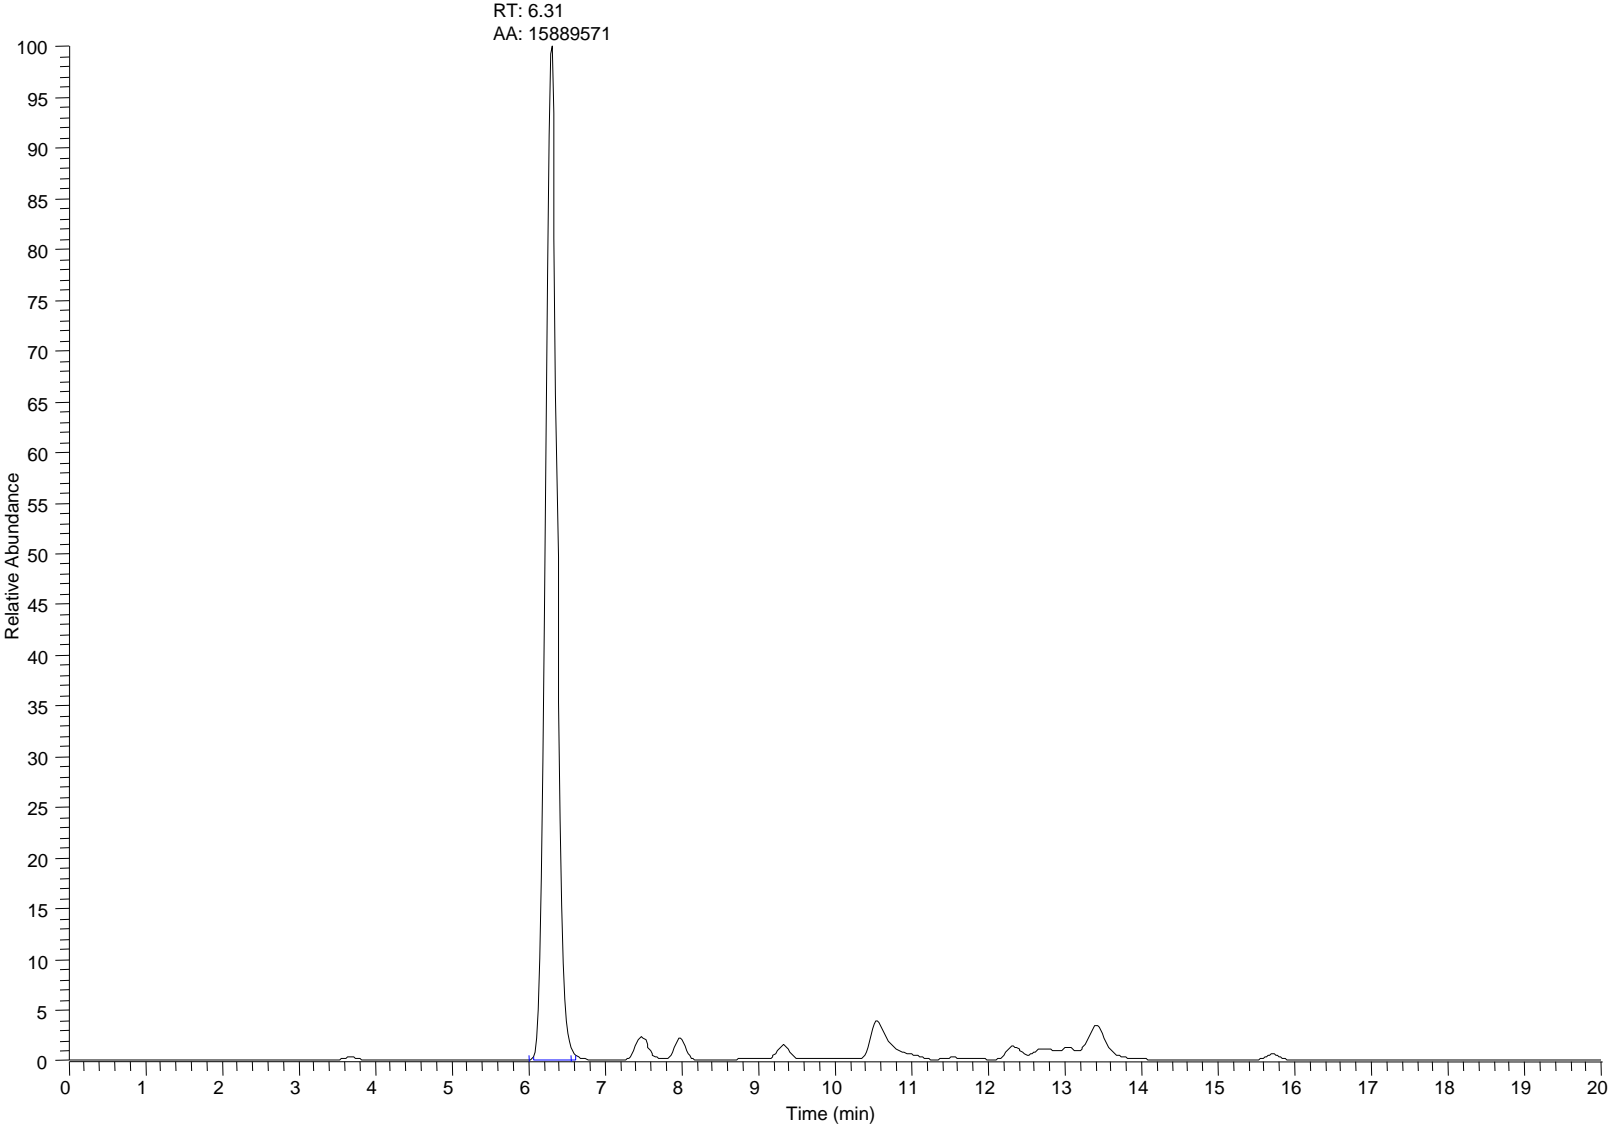

# Supplementary Fig 4d:

## Mass spectra of Hydralazine glucose conjugate

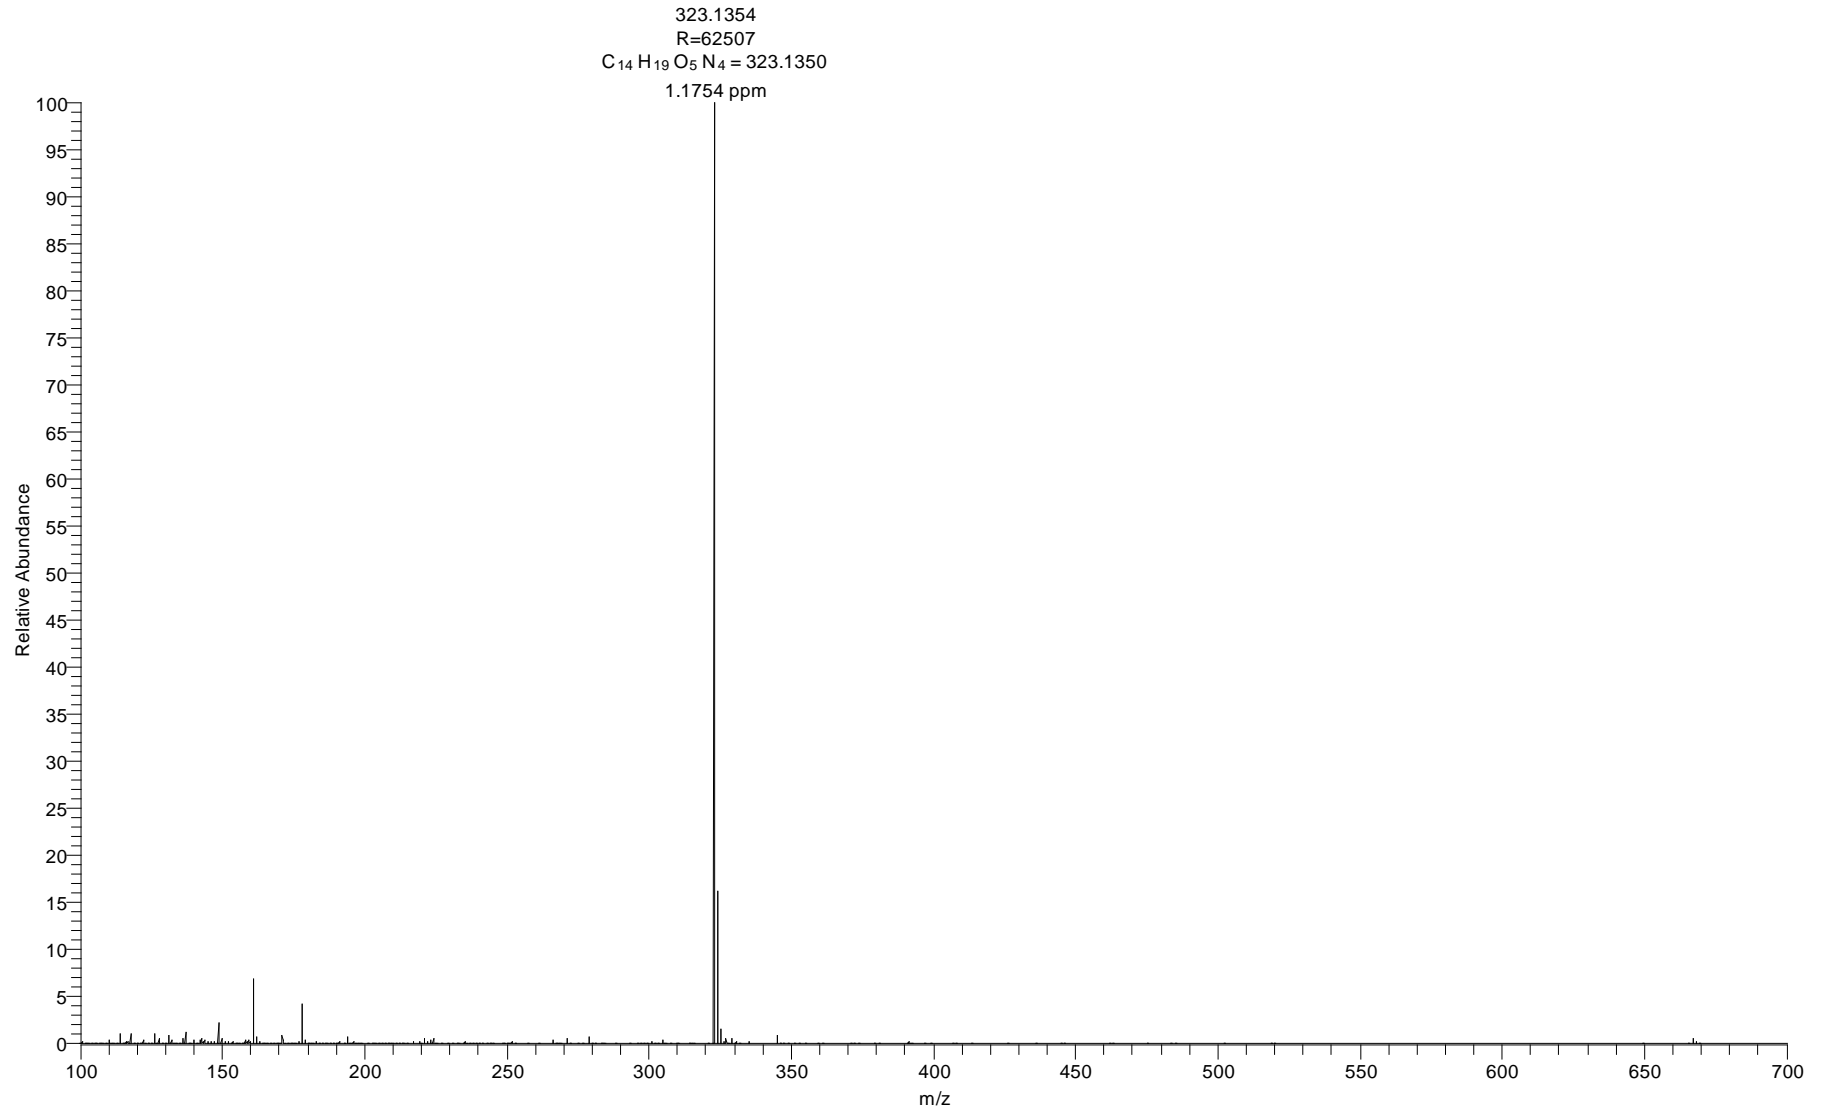

## Supplementary Fig 5:

Fragmentation pattern for Hydralazine glucose conjugate (m/z 323.1350) along with Hydralazine <sup>13</sup>C glucose conjugate (m/z 324.1384)

### Major fragmentation pattern of 323.1350 (324.1384)

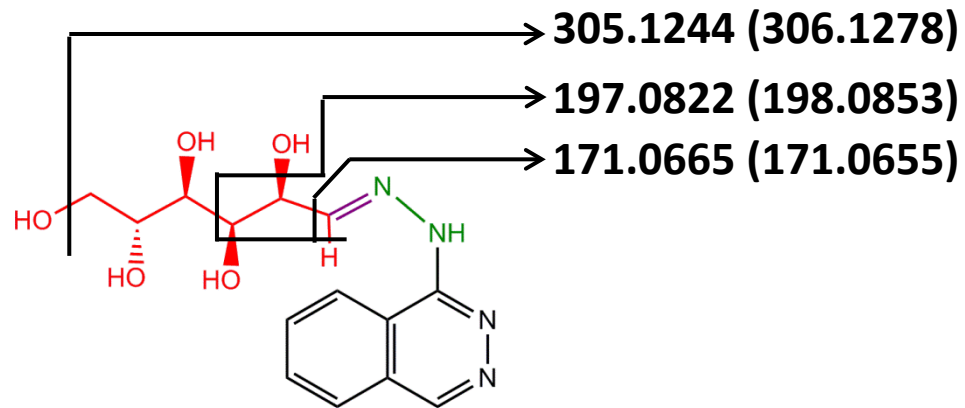

# Supplementary Fig 6:

## MS/MS Hydralazine glucose conjugate (m/z 323.1350)

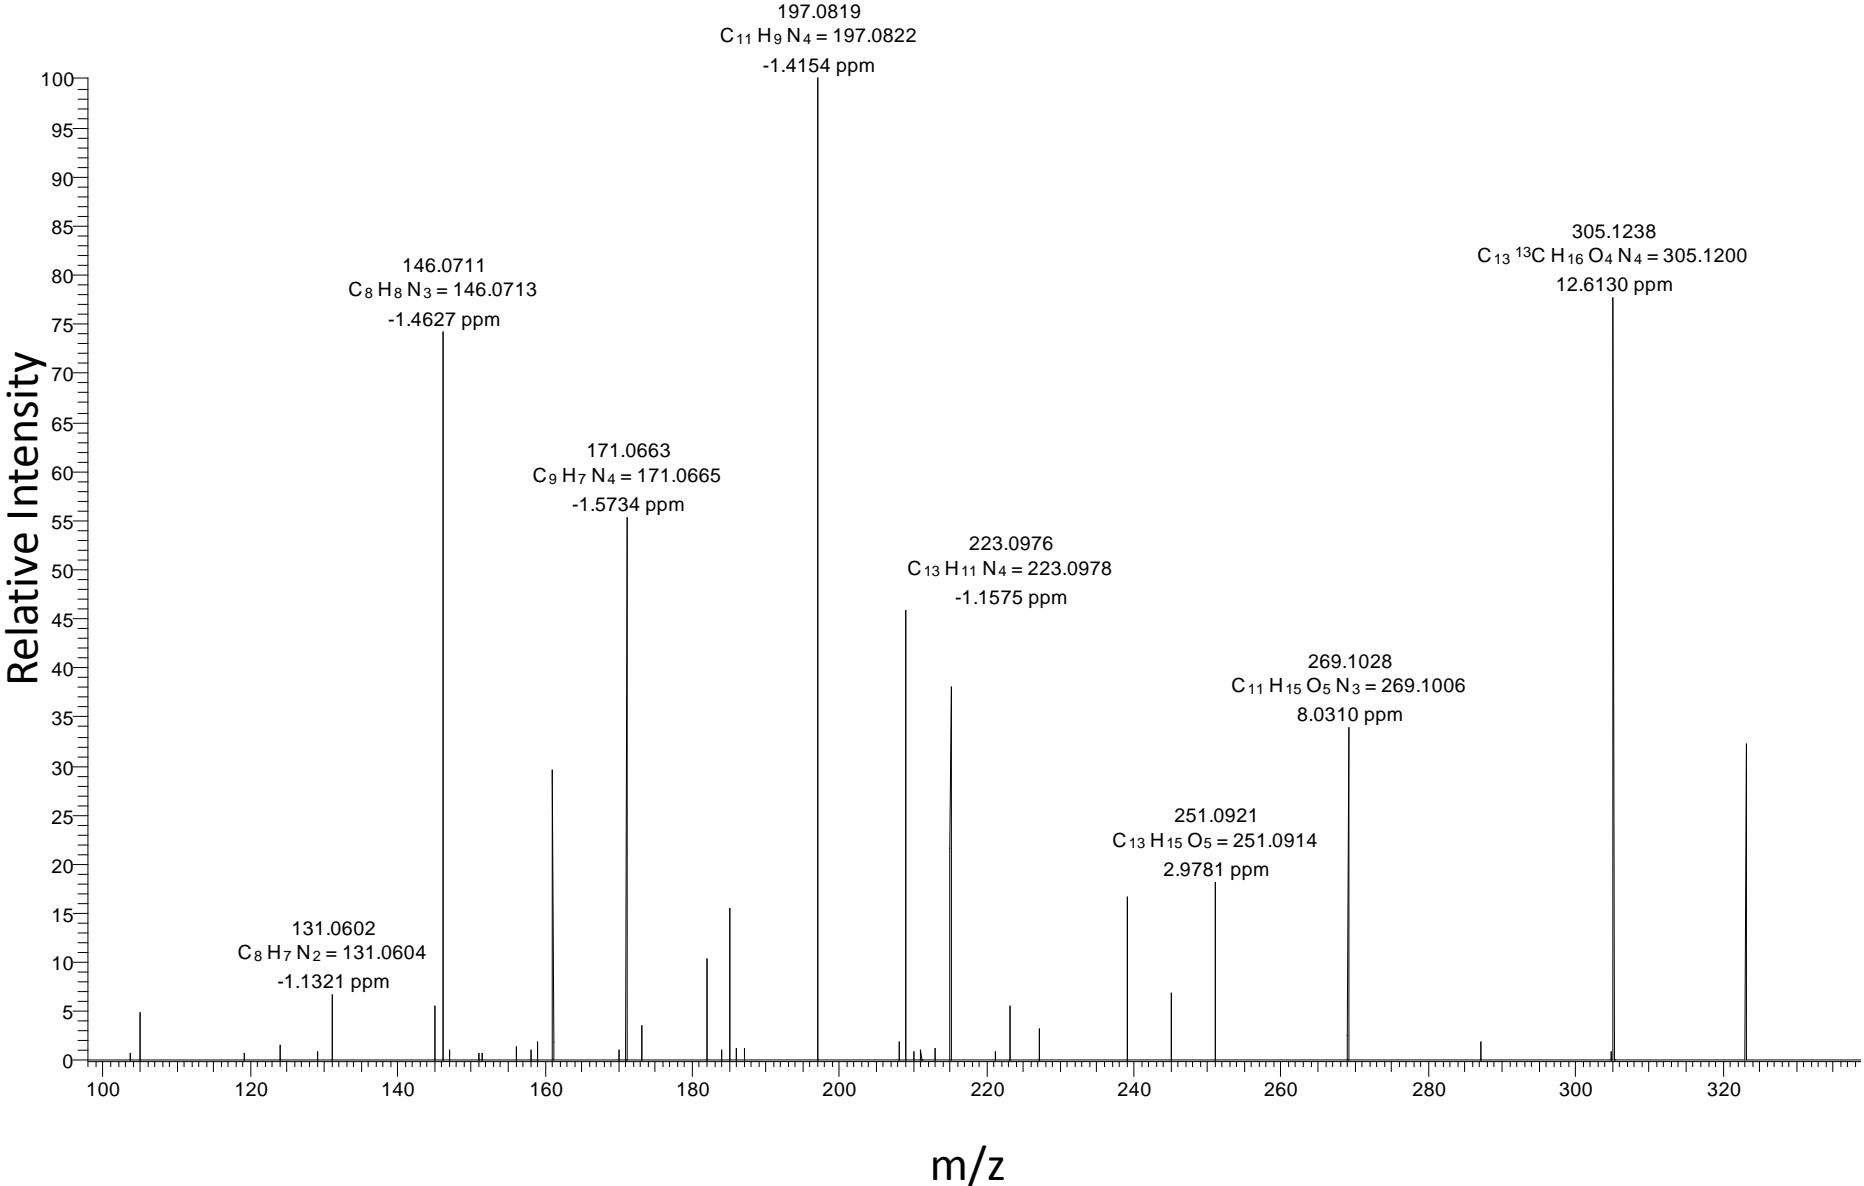

# Supplementary Fig 7: MS/MS of Hydralazine <sup>13</sup>C glucose conjugate (m/z 324.1384)

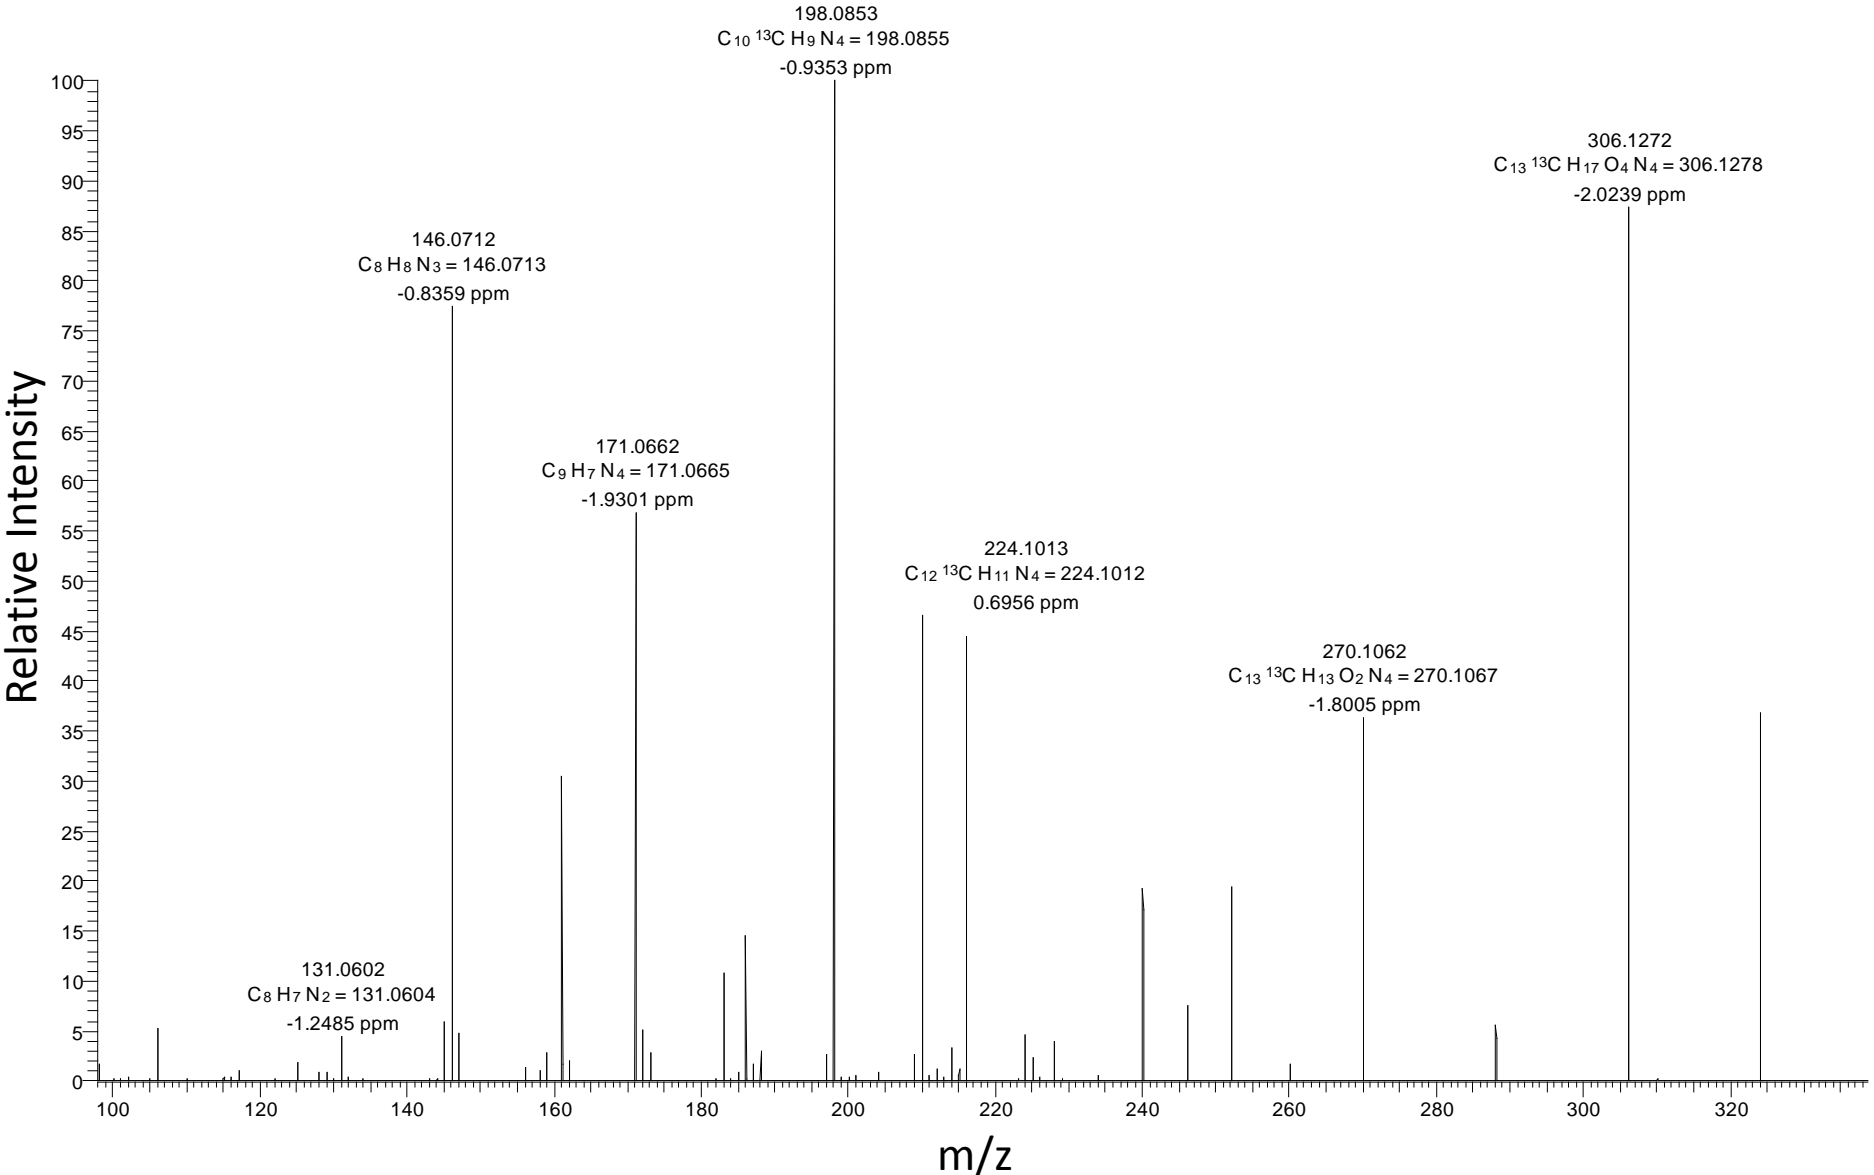

### Supplementary Fig 8:

Standard curve of Hydralazine glucose conjugate generated by plotting  $\log_{10}(\text{AUC})$  Vs  $\log_{10}$  (concentration of hydralazine conjugate)

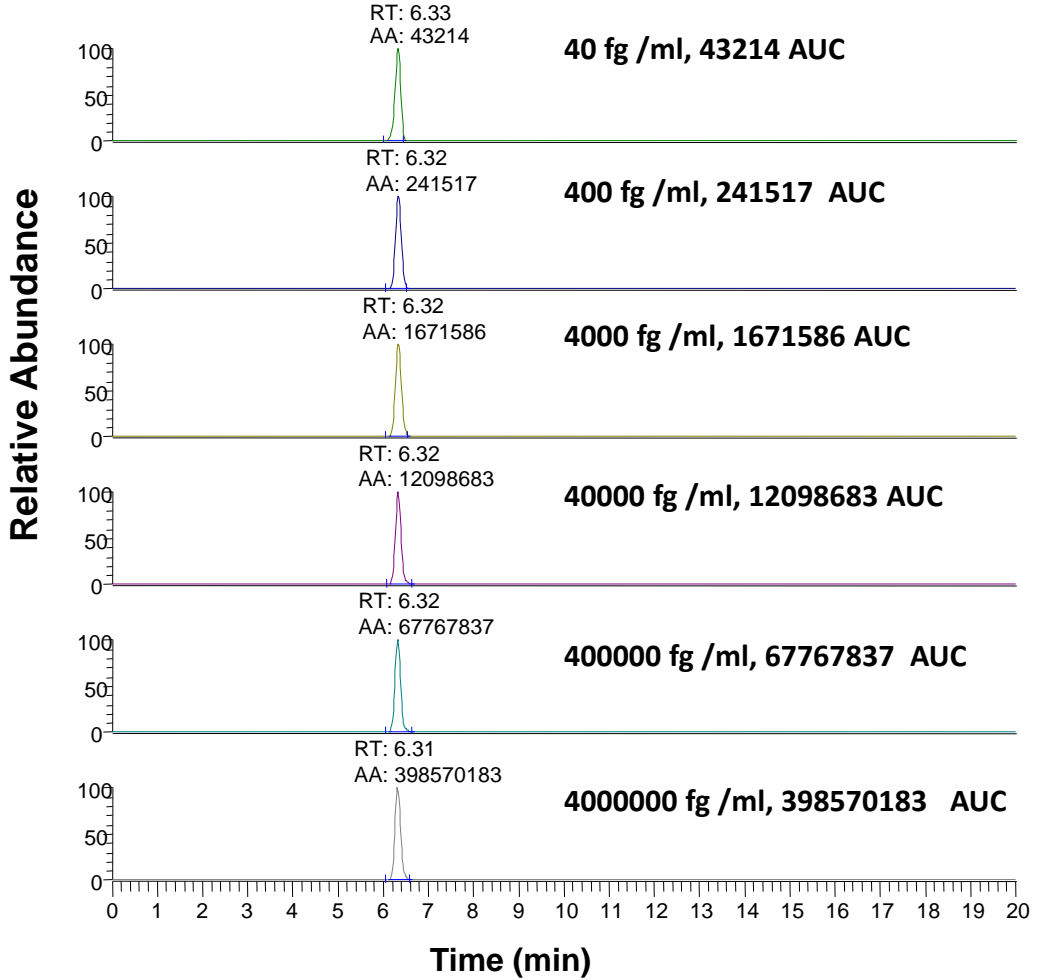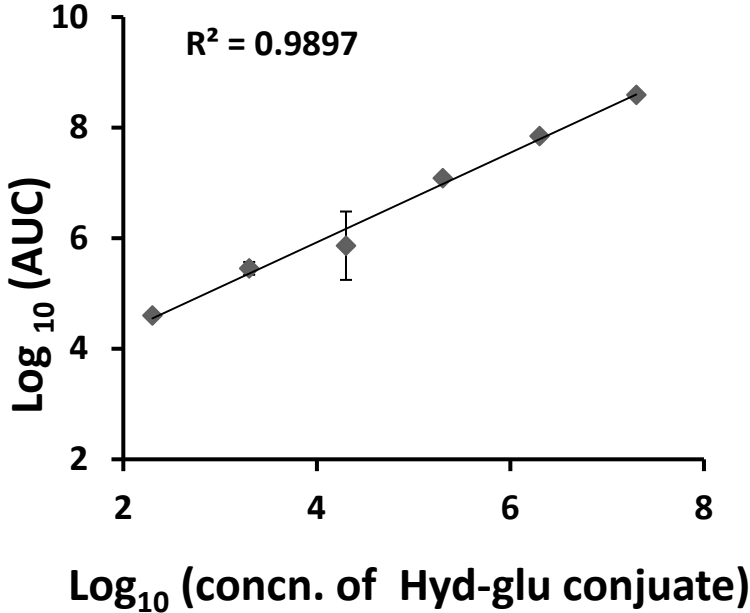

## Supplementary Fig 9:

Fourier transform infrared (FT-IR) spectrum of Hydralazine glucose conjugate, on Bruker Optics ALPHA-E spectrometer with a universal Zn-Se ATR (attenuated total reflection) accessory in the 600-4000  $\text{cm}^{-1}$  region. IR  $\nu_{\text{max}}$  3306 (broad, NH and OH) 1647 (C=N) and 1563  $\text{cm}^{-1}$ (Ph).

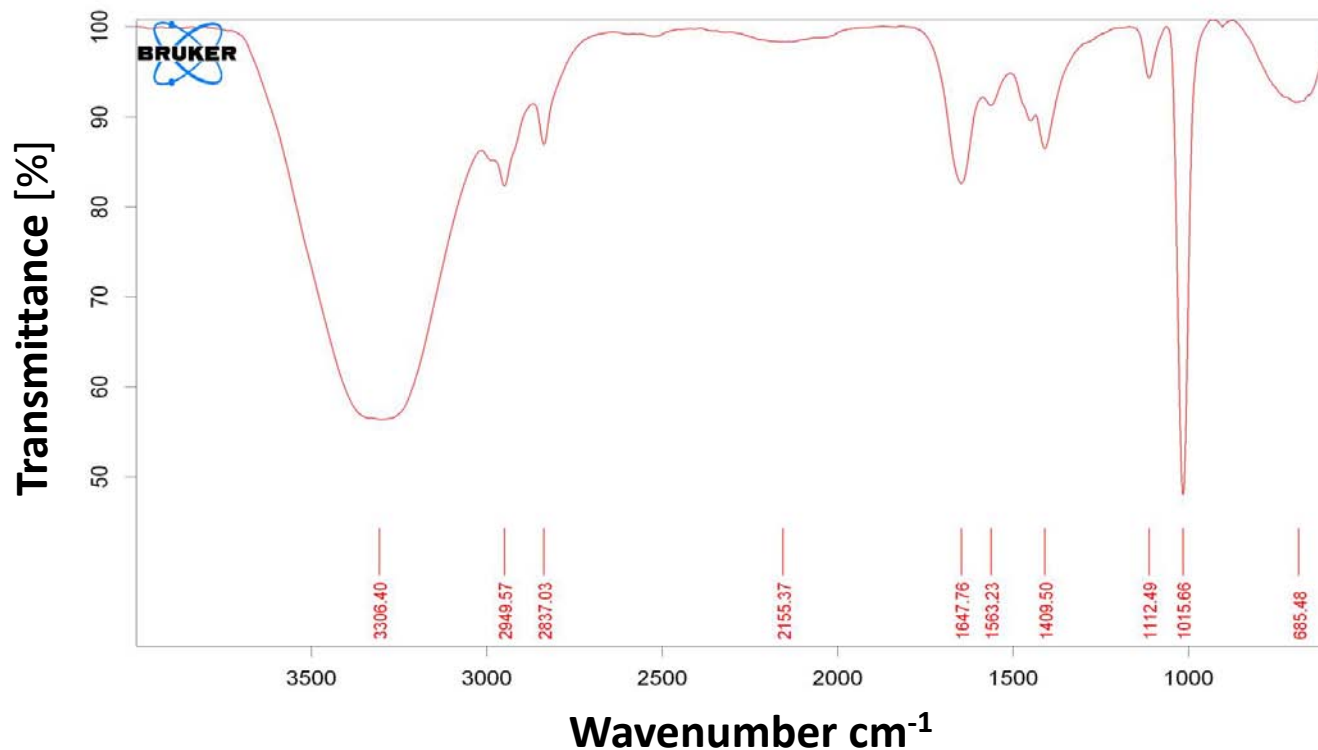

## Supplementary Information

**Table 1a: Glucose sensitive amino acid residues (GSARs) in human serum albumin and their homologs in mouse serum albumin according to Reference No. 20.**(Zhang et al., *Diabetes E-pub*(2013). doi: 10.2337/db13-0347

| Sl.No. | Sequence | Amino acid location in Human Serum Albumin | Amino acid location in Mouse Serum Albumin |
|--------|----------|--------------------------------------------|--------------------------------------------|
| 1      | HFK      | K44                                        | K44                                        |
| 2      | VAR      | R168                                       | R168                                       |
| 3      | VKE      | K210                                       | K210                                       |
| 4      | LTK      | K264                                       | K264                                       |
| 5      | KAP      | K438                                       | K438                                       |
| 6      | AAR      | R452                                       | R452                                       |

**Table 1b: Extent of AGE modification of GSAR containing peptides.** The values in the table represent the average cumulative intensity ratio (CIR) of AGE modified peptides containing Glucose Sensitive Amino acid Residues (GSARs) to their unmodified form (n=2)

| Sample      | K44        | R168       | K210        | K264         | K438         | R452        |
|-------------|------------|------------|-------------|--------------|--------------|-------------|
| HSA         | 0 ± 0      | 0 ± 0      | 0 ± 0       | 0 ± 0        | 0 ± 0        | 0 ± 0       |
| GLY HSA     | 8.22± 1.42 | 8.13± 0.85 | 10.62± 0.93 | 136.45± 1.94 | 270.99± 3.49 | 31.44± 0.8  |
| GLY HSA HYD | 1.53± 0.23 | 3.08± 0.62 | 0.37± 0.26  | 22.59± 1.02  | 3.6± 0.17    | 3.08± 0.39  |
| GLY HSA AMG | 9.55± 0.55 | 4.44± 0.14 | 2.04± 0.13  | 63.71± 4.63  | 55.1± 1.89   | 77.14± 2.38 |



**Table 1c: Extent of AGE modification of GSAR containing peptides in mouse** The values in the table represent the average cumulative intensity ratio (CIR) of AGE modified peptides containing Glucose Sensitive Amino acid Residues (GSARs) to their unmodified form (n=2)

| Sample   | K44         | R168        | K210         | K264        | K438        | R452         |
|----------|-------------|-------------|--------------|-------------|-------------|--------------|
| CONTROL  | 0 ± 0       | 2.63 ± 0.33 | 0 ± 0        | 0.18 ± 0.01 | 0 ± .0      | 0.44 ± 0.001 |
| DIABETIC | 9.33 ± 61   | 5.05 ± 0.81 | 62.34 ± 1.39 | 2.74 ± 0.15 | 0 ± 0.0     | 15.57 ± 0.73 |
| DIAB HYD | 0 ± 0.0     | 6.43 ± 0.37 | 0 ± 0.0      | 5.96 ± 0.47 | 0 ± 0.0     | 0 ± 0.0      |
| DIAB AMG | 1.55 ± 0.34 | 6.97 ± 0.53 | 0 ± 0.0      | 0 ± 0.0     | 2.35 ± 0.59 | 0.22 ± 0.02  |

**Supporting information for Table 1C: Sequence alignment of Mouse and Human serum albumin to identify glucose sensitive amino acid residues according to Zhang et al., (Ref. No. 20)**

**ALBU\_MOUSE** MKWVTFLLLLFVSGSAFSGVFRREAHKSEIAHRYNDLGEQ**HF**KGLVLIAFSQYLQKCSYDEHAKLVQEV **70**  
**ALBU\_HUMAN** MKWVTFISLLFLFSSAYSRGVFRRDAHKSEVAHRFKDLGEE**NF**KALVLIAFAQYLQQCPF EDHVKLVNEV **70**

**ALBU\_MOUSE** TDFAKTCVADESAANCDKSLHTLFGDKLCAIPNLRENYGELADCCTKQEPERNECFQHKDDNPSLPPFE **140**  
**ALBU\_HUMAN** TFAKTCVADESAENCDKSLHTLFGDKLCTVATLRETYGEMADCCAKQEPERNECFQHKDDNPNLPRLV **140**

**ALBU\_MOUSE** RPEAEAMCTSFKENPTTFMGHYLHE**VAR**RHPYFYAPELly YAEQYNEILTQCCAADKESCLTPKLDG**VK** **210**  
**ALBU\_HUMAN** RPEVDVMCTAFHDNEETFLKLYE**IARR**HYPYFAPELLFFAKRYKAAFTCCQAADKAAACLLPKLDE**LR** **210**

**ALBU\_MOUSE** EKALYSSVRQRMKCSSMQKFGERAFKAWAVARLSQTFPNADFIEITKLATD**LTK**VNKECCHGDLLECADD **280**  
**ALBU\_HUMAN** **D**EGKASSAKQRLKCASLQKFGERAFKAWAVARLSQRFPAEFAEVSKLVTD**LTK**VHTECCHGDLLECADD **280**

**ALBU\_MOUSE** RAELAKYMCENQATISSKLQ TCCDKPLLKKAHCLSEVEHDTMPADLPAIAADFVEDQEVCNKYAEAKDVF **350**  
**ALBU\_HUMAN** RADLAKYICENQDSISSKLCCKEPLLEKSHCIAEVENDEMPADLPSLAADFVESKDVCKNYAEAKDVF **350**

**ALBU\_MOUSE** LGTF**LYEYSR** RHPDYSVLSLLRLAKKYEATLEKCCAEANPPACYGTVLAEFQPLVEEPKNLVKTNCDLYE **420**  
**ALBU\_HUMAN** LGMFLYE**YAR** RHPDYSVLLRLAKTYETTLEKCCAAADPHECYAKVFDEFKPLVEEPQNLIKQNCLEFE **420**

**ALBU\_MOUSE** KLGEYGFQNAILVRYTQ**KAP**QVSTPTLVE**AAR**NLGRVGTCCCTLPEDQRLPCVEDYLSAILNRVCLLHEK **490**  
**ALBU\_HUMAN** QLGEYKFNALLVRYTK**KVP**QVSTPTLVE**VSR**NLGKVGSKCKHPEAKRMPCAEDYLSVV LNQLCVLHEK**490**

**ALBU\_MOUSE** TPVSEHVTKCCSGSLVERRPCFSALTVDETYVPKEFKAETFTFHSDICTLPEKEKQIKKQTALAEVKKPKATAEQQLKT **570**  
**ALBU\_HUMAN** TPVSDRVTKCCTESLVNRRPCFSALEVDETYVPKEFNAETFTFHADICTLSEKERQIKKQTALVELVKKPKATKEQLKA **570**

**ALBU\_MOUSE** VMDDFAQFLDTCCKAADKDTCFSTEGPNLVTRCKDALA- **608**  
**ALBU\_HUMAN** VMDDFAAFVEKCKADDKETCFEAEGKLVAAASQAALGL **609**

Uniprot ID P07724-MOUSE SERUM ALBUMIN  
Uniprot ID P02768-HUMAN SERUM ALBUMIN

**Table 2: AGE modifications and their corresponding  $\Delta M$  listed as below**

| <b>Sl.no.</b> | <b>Modification name</b>                               | <b>Amino acid modification position</b> | <b><math>\Delta M</math> in Dalton(Da)</b> |
|---------------|--------------------------------------------------------|-----------------------------------------|--------------------------------------------|
| 1             | Amadori (Schiff base)                                  | K or R                                  | 162.0211                                   |
| 2             | Carboxy methyl lysine (CML)                            | K                                       | 58.0055                                    |
| 3             | Carboxy ethyl lysine (CEL)                             | K                                       | 72.0211                                    |
| 4             | Pyraline (PYR)                                         | K                                       | 108.0211                                   |
| 5             | 1-alkyl-2-formyl-3,4-glycosyl-pyrrole (AFGP)           | K or R                                  | 270.074                                    |
| 6             | Imidazolone-B                                          | R                                       | 142.02                                     |
| 7             | Methyl glyoxal lysine dimer (MOLD)                     | K or R                                  | 49.0078                                    |
| 8             | Crossline                                              | K or R                                  | 252.11                                     |
| 9             | Fructoselysine (FL-1H <sub>2</sub> O)                  | K                                       | 144.04                                     |
| 10            | Fructoselysine (FL-2H <sub>2</sub> O)                  | K                                       | 126.03                                     |
| 11            | Methylglyoxal derived imidazolium<br>Crosslink (MODIC) | K or R                                  | 36.02                                      |
| 12            | Glyoxalderived hydroimidazolone (GH1)                  | R                                       | 39.99                                      |
| 13            | Carbamidomethyl C                                      | C                                       | 57.0214                                    |
| 14            | Oxidation M                                            | M                                       | 15.9949                                    |

**Table 3: List of AGE modified peptides for *in vitro* modified Human Serum Albumin.**

LC-MS<sup>E</sup> analysis depicting the number of AGE modified peptides in HSA, glycated HSA, glycated HSA in presence of hydralazine (50mM) and aminoguanidine (50mM). The values in the table represent the number of AGE modified peptides in at least two replications. Glycated HSA had more number of AGE modified peptides than unglycated HSA. In presence of Hydralazine and aminoguanidine the number of AGE modified peptides were decreased

| <b>Sample</b>     | <b>No. of Modified Peptides</b> |
|-------------------|---------------------------------|
| <b>HSA</b>        | <b>8</b>                        |
| <b>GLY HSA</b>    | <b>31</b>                       |
| <b>GLYHSA HYD</b> | <b>14</b>                       |
| <b>GLYHSA AMG</b> | <b>24</b>                       |

(The details of the modified peptides is continued on the next page)

| CONtrol            |      |                 |        |       |     |                                                       |                                                                         |                                                                                  |
|--------------------|------|-----------------|--------|-------|-----|-------------------------------------------------------|-------------------------------------------------------------------------|----------------------------------------------------------------------------------|
| Precursor MH+ (Da) | z    | MH+ Error (ppm) | Score  | Start | End | Sequence                                              | Modifications                                                           | BY Matches                                                                       |
| 1938.945           | 2.55 | 7.6521          | 7.0157 | 566   | 581 | (K)EQLKAVMD<br>DFAAFVEK(C)                            | MOLD (4), MOLD (16)                                                     | b1°b2°b3b4*b5*b8*b10b10*b11b11°b12*b13b13°b14b14*b15*b15°y3y3°y5y9y11°y12y12°y16 |
| 4209.944           | 4.9  | 0.5513          | 7.3105 | 509   | 543 | (R)RPCFSALEVD<br>ETYVPKEFNAET<br>FTFHADICTLSE<br>K(E) | Carbamidomethy I C (3),<br>Carbamidomethy I C (30), CML (35)            | b1b5°b8°b12b14b15y1y2y6y7y11y11°y19y23°y24°y31*y35                               |
| 2086.138           | 3    | 0.9107          | 6.6488 | 439   | 456 | (K)VPQVSTPTL<br>VEVSRNLGK(V)                          | MODIC (14), FL-2H2O (18)                                                | b3b3*b4*b9°b11°b13b18y2y4y5*y6°y7°y10°y18                                        |
| 3031.405           | 3.38 | -6.4221         |        | 414   | 434 | (K)QNCLEFEQL<br>GEYKFQNALLV<br>R(Y)                   | Carbamidomethy I C (3), AFGP (13),<br>AMADORI (21)                      | b4°b6°b10b20°y19°y21                                                             |
| 4223.988           | 4.86 | 2.3411          |        | 397   | 426 | (K)VFDEFKPLVE<br>EPQNLIKQNCLE<br>FEQLGEYK(F)          | AFGP (6),<br>PYRALINE (17),<br>Carbamidomethy I C (20),<br>AMADORI (30) | b3°b4°b7b9b13°b24*b25b29*y3°y4y4°y8°y9y23°y28°y29                                |
| 1778.915           | 3    | 1.5216          | 6.4525 | 170   | 183 | (R)HPYFYAPELL<br>FFAK(R)                              | MODIC (14)                                                              | b1b2b4b7b10°b12°y14                                                              |
| 2908.37            | 4    | -5.4955         | 6.4679 | 139   | 161 | (R)LVRPEVDVM<br>CTAFHDNEETFL<br>KK(Y)                 | Carbamidomethy I C (10), CEL (22),<br>CML (23)                          | b2b6b7b14°b17*b23*y8°y9y11*y11°y12°y15y15*y19°y23*                               |
| 1812.814           | 3    | 0.8754          | 6.634  | 118   | 130 | (K)QEPERNECF<br>LQHK(D)                               | MOLD (5),<br>Carbamidomethy I C (8), MOLD (13)                          | b1b1*b2b2°b3*b4*b6*b8b10b10*y1y5*y7y7°y8*y9*y11                                  |

| GLY                |      |                 |        |       |     |                                                   |                                                                                         |                                                                 |
|--------------------|------|-----------------|--------|-------|-----|---------------------------------------------------|-----------------------------------------------------------------------------------------|-----------------------------------------------------------------|
| Precursor MH+ (Da) | z    | MH+ Error (ppm) | Score  | Start | End | Sequence                                          | Modifications                                                                           | BY Matches                                                      |
| 1328.5718          | 2    | 3.2365          | 7.0894 | 589   | 598 | (K)ETCFAEEGKK(L)                                  | Carbamidomethyl C (3),<br>CEL (9), CML (10)                                             | b1°b3b4b5b9°y3y6y7°                                             |
| 2114.8926          | 2.71 | -1.89           | 6.7653 | 570   | 584 | (K)AVMDDFAAFVEK<br>CCK(A)                         | AMADORI (12),<br>Carbamidomethyl C (13),<br>Carbamidomethyl C (14),<br>AMADORI (15)     | b11°b14b15y7°y8°y9°y<br>13y13°                                  |
| 1186.6981          | 1.98 | -5.1278         | 7.7327 | 549   | 558 | (K)KQTALVELVK(H)                                  | CML (1)                                                                                 | b3°b4b4°b6°y3y4y5y6<br>y7y8y9y9°y9°y10                          |
| 2617.2063          | 4    | 7.2165          | 6.3873 | 525   | 545 | (K)EFNAETTFHADIC<br>TLSEKER(Q)                    | Carbamidomethyl C (14),<br>CEL (19)                                                     | b5°b6°b17b21y2°y3y4<br>y20*                                     |
| 4535.0806          | 4.75 | -3.3259         | 6.2918 | 509   | 545 | (R)RPCFSALEVDETYV<br>PKFNAETTFHADIC<br>TLSEKER(Q) | Carbamidomethyl C (3),<br>Carbamidomethyl C (30),<br>MOLD (35), MOLD (37)               | b11°b15°b16b25y3°y1<br>1°y24*y25°                               |
| 3102.4421          | 3    | 2.9673          | 6.7722 | 500   | 524 | (K)CCTESLVNRRPCFS<br>ALEVDETYVPK(E)               | Carbamidomethyl C (1),<br>Carbamidomethyl C (2),<br>Carbamidomethyl C (12),<br>CEL (25) | b2b11b13b13*b16b16<br>°b18*b23y15y16y24°                        |
| 1982.958           | 3    | -4.7964         | 6.6194 | 509   | 524 | (R)RPCFSALEVDETYV<br>PK(E)                        | MODIC (1),<br>Carbamidomethyl C (3),<br>MODIC (16)                                      | b3b10b14b14°b15b15°<br>y11y15                                   |
| 1524.7242          | 2.47 | 6.3755          | 7.8885 | 497   | 508 | (R)VTKCTESLVNR(R<br>)                             | CML (3),<br>Carbamidomethyl C (4),<br>Carbamidomethyl C (5)                             | b2b2°b4b8b9y2*y3y4y<br>5y5*y6y7y8y9y9*y10y<br>10°y11y12         |
| 3492.6143          | 3.54 | -2.97           | 7.1034 | 470   | 496 | (R)MPCAEDYLSVVLN<br>QLCVLHEKTPVSDR(V<br>)         | Carbamidomethyl C (3),<br>Carbamidomethyl C (16),<br>AFGP (21), MOLD (27)               | b16b16*b17°b22b23b<br>27°y3y3°y5°y8y14y14*<br>y17y19y19*y20*y27 |
| 2576.1929          | 3.61 | -10.3           | 6.1926 | 470   | 490 | (R)MPCAEDYLSVVLN<br>QLCVLHEK(T)                   | Carbamidomethyl C (3),<br>Carbamidomethyl C (16),<br>CML (21)                           | b9°b11b12b14*b17°b2<br>1*y9*y9°y14y16*                          |
| 2836.4004          | 3.61 | 11.5126         | 6.3931 | 469   | 490 | (K)RMPCAEDYLSVVL<br>NQLCVLHEK(T)                  | AMADORI (1),<br>Carbamidomethyl C (4),<br>Carbamidomethyl C (17)                        | b10b11b11°b14°b16*b<br>21*y2°y3y15y16                           |
| 1697.9583          | 2.23 | 8.8665          | 7.2515 | 438   | 452 | (K)KVPQVSTPTLVEVS<br>R(N)                         | CML (1)                                                                                 | b5b7b7°b10°y6y7y9y1<br>3y15                                     |

| Precursor MH+ (Da) | z    | MH+ Error (ppm) | Score  | Start | End | Sequence                                      | Modifications                                                                               | BY Matches                                                                                 |
|--------------------|------|-----------------|--------|-------|-----|-----------------------------------------------|---------------------------------------------------------------------------------------------|--------------------------------------------------------------------------------------------|
| 4007.9998          | 3.62 | 5.9354          | 6.7278 | 397   | 426 | (K)VFDEFKPLVEEPQ<br>NLIKQNCLEFQELGEY<br>K(F)  | CROSSLINE (6), MODIC (17), Carbamidomethyl C (20), MODIC (30)                               | b9b11b12b13b16*b23<br>*y4y4°y9°y12*y13°y15<br>y23°y30                                      |
| 2103.1145          | 2.64 | 6.4338          | 7.683  | 397   | 413 | (K)VFDEFKPLVEEPQ<br>NLIK(Q)                   | CML (6)                                                                                     | b2b3b4b5b6b12y4y6y<br>8y9y9°y10*y11y11°y1<br>5y16y17                                       |
| 2680.1497          | 3.44 | 10.5857         | 7.7348 | 376   | 396 | (K)TYETTLEKCCAAAD<br>PHECYAK(V)               | AMADORI (8),<br>Carbamidomethyl C (9),<br>Carbamidomethyl C (10),<br>Carbamidomethyl C (18) | b1°b2°b3b3°b4°b6b8°<br>b14b14°b17b21y3y4y5<br>y5°y6y7y8y10y11°y12y<br>13°y14y16°y17°y19y21 |
| 1404.7281          | 3    | 1.8095          | 7.1501 | 373   | 383 | (R)LAKTYETTLEK(C)                             | PYRALINE (3)                                                                                | b3b6b6°b7°b8b8°b10b<br>10°b11y2y2°y7°y9                                                    |
| 3620.6116          | 5    | 1.0166          | 6.5725 | 311   | 341 | (K)SHCIAEVENDEMP<br>ADLPSLAADFVESKD<br>VCK(N) | Carbamidomethyl C (3),<br>FL-1H2O (27),<br>Carbamidomethyl C (30)                           | b2b10b11*b14*b15*b<br>18*b20°y2y9°y10°y13y<br>13°y17°y18y26y28                             |
| 1708.8525          | 4    | 1.6776          | 6.9291 | 299   | 310 | (K)LKECCEKPLEK(S)                             | AMADORI (2),<br>Carbamidomethyl C (4),<br>Carbamidomethyl C (5)                             | b7b8°b10°b11y4y6y9y<br>12                                                                  |
| 2035.9572          | 2.87 | 5.6155          | 6.2978 | 282   | 298 | (R)ADLAKYICENQDSI<br>SSK(L)                   | MODIC (5),<br>Carbamidomethyl C (8),<br>CML (17)                                            | b6°b10b11°b12*b13*b<br>14°b15°b16b16*y5°y1<br>1°y12*y12°y15y16°                            |
| 1812.9558          | 2.58 | 4.4799          | 7.9739 | 250   | 264 | (K)AEFAEVSKLVTDLT<br>K(V)                     | AMADORI (8)                                                                                 | b3b5b6b9b12b15y3y3<br>°y4y4°y5y5°y6y6°y7y1<br>2y13y13°y15                                  |
| 1005.539           | 1.98 | -0.7938         | 7.6089 | 222   | 229 | (R)LKCASLQK(F)                                | CML (2),<br>Carbamidomethyl C (3)                                                           | b4y1y2y2*y3y4y5y6y6<br>*y8                                                                 |
| 1128.557           | 2.04 | 3.3856          | 7.2926 | 206   | 214 | (K)LDELRDEGK(A)                               | MGH1 (5)                                                                                    | b1b2b6b8°y2y3°y5y5°y<br>6°y8y9                                                             |
| 2058.869           | 3.56 | -4.0921         | 6.5787 | 185   | 198 | (R)YKAAFTECCQAAD<br>K(A)                      | FL-1H2O (2),<br>Carbamidomethyl C (8),<br>Carbamidomethyl C (9),<br>CROSSLINE (14)          | b5b6°b8b8°b11y2°y8y<br>8*y8°y9y10y10°y11*y<br>12°y13*y14                                   |
| 1217.6459          | 2.03 | 3.8532          | 7.9496 | 161   | 168 | (K)KYLIEIAR(R)                                | AMADORI (1)                                                                                 | b3b8y1y3y4y4°y5y6y7<br>y8                                                                  |
| 2926.3909          | 3.53 | 5.4049          | 6.6068 | 139   | 161 | (R)LVRPEVDVMCTAF<br>HDNEETFLKK(Y)             | GH1 (3),<br>Carbamidomethyl C (10),<br>PYRALINE (23)                                        | b10b12°b14°b16b20*y<br>2y3y8°y9*y11°y14y14<br>*y15                                         |
| 1876.8546          | 3    | 2.7636          | 6.2211 | 118   | 130 | (K)QEPERNECFQHK<br>(D)                        | Carbamidomethyl C (8),<br>AMADORI (13)                                                      | b3°b6b11*b11°y9y11*<br>y12y12°                                                             |
| 2708.1746          | 3.66 | 6.2592          | 6.4248 | 76    | 97  | (K)TCVADESAENCDK<br>SLHTLFGDK(L)              | Carbamidomethyl C (2),<br>Carbamidomethyl C (11),<br>MOLD (13), AMADORI<br>(22)             | b2b9°b10°b14°b15b16<br>*y11y12°y13                                                         |

| Precursor MH+ (Da) | z    | MH+ Error (ppm) | Score  | Start | End | Sequence                                    | Modifications                                               | BY Matches                                             |
|--------------------|------|-----------------|--------|-------|-----|---------------------------------------------|-------------------------------------------------------------|--------------------------------------------------------|
| 3516.703           | 4.34 | -8.3814         | 6.6108 | 37    | 65  | (K)DLGEENFKALVLIA<br>FAQYLQQCPFEDHVK<br>(L) | MODIC (8),<br>Carbamidomethyl C (22),<br>CML (29)           | b13°b23°b25b26°b27b<br>27°b29*y5y13y15*y21<br>°y24y29* |
| 1284.6173          | 2.06 | 5.154           | 7.9313 | 35    | 44  | (R)FKDLGEENFK(A)                            | CML (2)                                                     | b3y2y3y3*y5y6y7y8y1<br>0                               |
| 1720.745           | 2.38 | 8.0633          | 7.719  | 185   | 198 | (R)YKAAFTECCQAAD<br>K(A)                    | CML (2),<br>Carbamidomethyl C (8),<br>Carbamidomethyl C (9) | b3b4b9°b10b12b13y1<br>y2y3y4y5°y7y8y9y10y<br>12y12*y14 |
| 2511.161           | 3.59 | -1.9191         | 6.8772 | 342   | 360 | (K)NYAEAKDVFLGM<br>FLYEYAR(R)               | MOLD (6), AMADORI (19)                                      | b2b2*b3*b4b5b11b14<br>*b15°b16b16°b19y7y8<br>y13°      |

**GLY HYD**

| Precursor MH+ (Da) | z    | MH+ Error (ppm) | Score  | Start | End | Sequence                      | Modifications                                               | BY Matches                                                      |
|--------------------|------|-----------------|--------|-------|-----|-------------------------------|-------------------------------------------------------------|-----------------------------------------------------------------|
| 1290.756           | 2.05 | 3.7303          | 7.9389 | 549   | 558 | (K)KQTALVELVK(H)              | AMADORI (1)                                                 | b5°b7°y3y4y4°y5y5°y6y7y8y8°9y10                                 |
| 1812.96            | 2.56 | 6.7966          | 7.7066 | 250   | 264 | (K)AEFAEVSKLVTD LTK(V)        | AMADORI (8)                                                 | b3b5b6°b8b15y1y2y2°y3y4y5y6y6°y7y13y13°y15                      |
| 1802.008           | 2.39 | 9.7419          | 6.8221 | 438   | 452 | (K)KVPQVSTPTLVE VSR(N)        | AMADORI (1)                                                 | b1b4b6b6°b6°b15y3°y7°y8y9°y12°y13°y13°y14y15                    |
| 2008.942           | 2.82 | -2.4446         | 6.7999 | 509   | 524 | (R)RPCFSALEVDET YVPK(E)       | MOLD (1), Carbamidomethyl C (3), MOLD (16)                  | b2b3b11b12°y1y6°y8y9y10y10°y11°y12y16                           |
| 1284.614           | 2.09 | 2.8186          | 7.9139 | 35    | 44  | (R)FKDLGEENFK(A)              | CML (2)                                                     | b3b5°b6°y2y3y4y4°y5y6y6°y7y8y10                                 |
| 1217.645           | 2.05 | 3.4426          | 7.6848 | 161   | 168 | (K)KYLIEIAR(R)                | AMADORI (1)                                                 | b8°y3y4y4°y5y6y7y8                                              |
| 2707.315           | 3.95 | -1.3918         | 7.0826 | 414   | 434 | (K)QNCLEFELGEY KFNALLVR(Y)    | Carbamidomethyl C (3), PYRALINE (13)                        | b2°b5b9b9°y6y7y7°y8y10°y11°y19y21                               |
| 1303.751           | 1.92 | 3.4246          | 7.2522 | 598   | 609 | (K)KLVAASQAALGL (-)           | AMADORI (1)                                                 | b1b4b9b10b11°b12°y2y3y8y9°y10°y12                               |
| 1672.831           | 3.22 | 1.5942          | 6.9659 | 299   | 310 | (K)LKECCEKPLLEK(S)            | Carbamidomethyl C (4), Carbamidomethyl C (5), FL-2H2O (12)  | b2b3b8b9b12y2y3y9                                               |
| 2659.165           | 3.62 | 5.7728          | 6.8846 | 76    | 97  | (K)TCVADESAENC DKSLHTLFGDK(L) | Carbamidomethyl C (2), Carbamidomethyl C (11), AMADORI (13) | b2b12b22y3y4y6y7y7°y22                                          |
| 1354.713           | 2.21 | 2.3192          | 7.4443 | 373   | 383 | (R)LAKTYETLEK(C)              | CML (3)                                                     | b5b6b8b10b10°y4y5y7y8y9y11                                      |
| 2690.27            | 4    | 3.9698          | 6.9863 | 139   | 160 | (R)LVRPEVDVMCT AFHDNEETFLK(K) | GH1 (3), Carbamidomethyl C (10)                             | b3b11b13°b20°b22°y1y2y3y4y5y5°y10°y11y11°y13°y14y14°y14°y15°y16 |
| 1323.583           | 2    | -4.1442         | 6.6434 | 338   | 347 | (K)DVCKNYAEAK(D)              | Carbamidomethyl C (3), FL-2H2O (10)                         | b2°b4b5b7b8b8°y7y10                                             |
| 2086.134           | 3    | -1.0067         | 6.6544 | 439   | 456 | (K)VPQVSTPTLVEV SRNLGK(V)     | MODIC (14), FL-2H2O (18)                                    | b3°b4b6°b8b8°b9°b11°b12°b16°y5°y6y6°y8y13°y15                   |



**GLY AMG**

| Precursor MH+ (Da) | z    | MH+ Error (ppm) | Score  | Start | End | Sequence                              | Modifications                                                        | BY Matches                                               |
|--------------------|------|-----------------|--------|-------|-----|---------------------------------------|----------------------------------------------------------------------|----------------------------------------------------------|
| 1802.0076          | 2.14 | 9.4644          | 7.1586 | 438   | 452 | (K)KVPQVSTPTLVEVSR(N)                 | AMADORI (1)                                                          | b2b4b5b6b6°b8*b9°b10b11*b12°b14b15y2°y7°y8y8°y13y13°y14° |
| 3656.9028          | 5.1  | 0.7689          | 6.363  | 45    | 75  | (K)ALVLIAFAQYLQQCPFEDHVKLVNEVTEFAK(T) | Carbamidomethyl C (14), MODIC (31)                                   | b16b17°b19°b31y4y6°y7y14*y21*y26*                        |
| 3561.616           | 4.62 | 6.9297          | 6.5086 | 311   | 341 | (K)SHCIAEVENDEMPADLPSLAADFVESKDVCK(N) | Carbamidomethyl C (3), MODIC (27), Carbamidomethyl C (30), MOLD (31) | b1°b3b11*b17b17*b18°y8°y17y22y26y27y29y29°y30*           |
| 1952.8549          | 2.68 | 5.5831          | 6.6262 | 570   | 584 | (K)AVMDDFAAFVEKCCK(A)                 | AMADORI (12), Carbamidomethyl C (13), Carbamidomethyl C (14)         | b4b10°b15b15°y3y7°y8y13y14°                              |
| 1588.9276          | 3    | 4.2015          | 6.9423 | 550   | 562 | (K)QTALVELVKHKPK(A)                   | MOLD (11), MOLD (13)                                                 | b1b3°b4°b7b8b9b13y3y5y13                                 |
| 1284.6147          | 1.94 | 3.13            | 7.6734 | 35    | 44  | (R)FKDLGEENFK(A)                      | CML (2)                                                              | b3b7°y3y4y5°y6y7y8y10                                    |
| 1654.8131          | 4    | -2.9207         | 6.7051 | 299   | 310 | (K)LKECCEKPLLEK(S)                    | PYRALINE (2), Carbamidomethyl C (4), Carbamidomethyl C (5)           | b4°b5b6b6°b7b9°b11°y1y12                                 |
| 1404.7207          | 3    | -3.5296         | 6.6921 | 373   | 383 | (R)LAKTYETTLEK(C)                     | PYRALINE (3)                                                         | b3b5°b6b7°b8°b9°b10b11y8°y9                              |
| 1628.7646          | 2.4  | 1.7319          | 7.3438 | 497   | 508 | (R)VTKCTESLVNR(R)                     | AMADORI (3), Carbamidomethyl C (4), Carbamidomethyl C (5)            | b1b2°b3°b4b8°b9°b11y2y2*y3y4y5y5°y6y7y8y12               |
| 2690.2556          | 4.54 | -1.197          | 6.3179 | 139   | 160 | (R)LVRPEVDVMCTAFHDNEETFLK(K)          | GH1 (3), Carbamidomethyl C (10)                                      | b6°b13b13°b17y2y10y12°y13°y14*y14°y15°                   |
| 1776.936           | 3    | 5.3023          | 6.3805 | 250   | 264 | (K)AEFAEVSKLVTDLT K(V)                | FL-2H2O (15)                                                         | b11b12°y1y4°y9°y10y10°y11y11°                            |
| 2176.1968          | 3.63 | 0.2297          | 6.6006 | 439   | 456 | (K)VPQVSTPTLVEVSRNLGK(V)              | CROSSLINE (18)                                                       | b2b3b5°b9b10*b12*b18y3y4y18                              |

| Precursor MH+ (Da) | z    | MH+ Error (ppm) | Score  | Start | End | Sequence                              | Modifications                                                                    | BY Matches                                       |
|--------------------|------|-----------------|--------|-------|-----|---------------------------------------|----------------------------------------------------------------------------------|--------------------------------------------------|
| 1326.6494          | 2.36 | -2.3964         | 7.0123 | 206   | 214 | (K)LDEL RDEGK(A)                      | CROSSLINE (5)                                                                    | b2b3b7°b8b9b9°y1y2y3°y4y4°y9                     |
| 3049.3882          | 3.65 | 0.5532          | 6.9852 | 525   | 545 | (K)EFNAETFFHADIC TLSEKER(Q)           | Carbamidomethyl C (14), CROSSLINE (19), CROSSLINE (21)                           | b4*b5b5°b8*b9*b13b14*y6y16                       |
| 2110.9573          | 3    | 3.973           | 6.5508 | 118   | 130 | (K)QEPERNECFLQHK (D)                  | CROSSLINE (5), Carbamidomethyl C (8), FL-1H20 (13)                               | b3°b4b4*b5*b6b7*b7°b12°y3*y6*y10*y11             |
| 1479.6534          | 2    | -4.4396         | 6.9516 | 287   | 298 | (K)YICENQDSISSK(L)                    | Carbamidomethyl C (3), MODIC (12)                                                | b1b3b4°b5°b6b9y3y5°y9y9*                         |
| 2662.2708          | 5    | 5.4333          | 6.6607 | 470   | 490 | (R)MPCAEDYLSVVLN QLCVLHEK(T)          | Carbamidomethyl C (3), Carbamidomethyl C (16), FL-1H20 (21)                      | b7°b9b10b12°b15b16°y7y7°y11*y20°                 |
| 2833.3818          | 5    | 3.7171          | 6.2066 | 414   | 434 | (K)QNC ELFQ LGEYK FQNALLVR(Y)         | Carbamidomethyl C (3), CEL (13), AMADORI (21)                                    | b1b1*b5*b13*b15*y4y6*y9y10*y11°y12*              |
| 860.4809           | 2    | -3.1705         | 7.2992 | 453   | 460 | (R)NLGKVGSK(C)                        | CML (4)                                                                          | b2*b3b5b5°b6b7b8*y2°y3y5y5°y6y7°                 |
| 1720.7452          | 2    | 8.5283          | 6.7709 | 185   | 198 | (R)YKAAFTECCQAAD K(A)                 | CML (2), Carbamidomethyl C (8), Carbamidomethyl C (9)                            | b14*y3y3°y4y5°y7y10y12y14                        |
| 2554.0867          | 3.61 | 0.106           | 7.0334 | 376   | 396 | (K)TYETTLEKCCAAAD PHECYAK(V)          | MODIC (8), Carbamidomethyl C (9), Carbamidomethyl C (10), Carbamidomethyl C (18) | b3°b9°b13°b14°b15°y5y7°y11°y12y12°y14y14°y15y20° |
| 2601.1987          | 5    | -9.4645         | 6.6188 | 342   | 360 | (K)NYAEAKDVFLGM FLYEYAR(R)            | CROSSLINE (6), MOLD (19)                                                         | b3*b5b7°b12°b13b13°y4y4°y5y8y9y13°y17y19*        |
| 1815.895           | 4    | -6.3826         | 6.2356 | 348   | 361 | (K)DVFLGMFLYEYAR R(H)                 | MODIC (13)                                                                       | b1°b5°b12b14°y1y5y5°y6y9                         |
| 3602.7493          | 5    | -0.5482         | 6.2987 | 37    | 65  | (K)DLGEENFKALVLIA FAQYLQCCPFEDHVK (L) | PYRALINE (8), Carbamidomethyl C (22), CEL (29)                                   | b6*b11b11*b16°b24*y7°y12y15°                     |

**Table 4: List of *in vivo* AGE modified proteins and their corresponding modified peptides**

| <b>UNIPROT ID</b> | <b>Protein Name</b>           | <b>CON</b> | <b>DIAB</b> | <b>DIAB HYD</b> | <b>DIAB AMG</b> |
|-------------------|-------------------------------|------------|-------------|-----------------|-----------------|
| P07724            | Serum albumin                 | 14.0       | 28.0        | 17.0            | <b>20.0</b>     |
| Q06890            | Clusterin                     | 6          | 17          | 11              | <b>11</b>       |
| P06728            | Apolipoprotein A IV           | 11.0       | 16.0        | 12.0            | <b>13.0</b>     |
| P21614            | Vitamin D binding protein     | 7.0        | 15.0        | 13.0            | <b>12.0</b>     |
| Q91X72            | Hemopexin                     | 7.0        | 15.0        | 10.0            | <b>11.0</b>     |
| Q61646            | Haptoglobin                   | 6.0        | 13.0        | 6.0             | <b>8.0</b>      |
| Q07456            | Protein AMBP                  | 4.0        | 12.0        | 8.0             | <b>8.0</b>      |
| P07759            | Serine protease inhibitor A3K | 9.0        | 9.0         | 6.0             | <b>8.0</b>      |
| P29699            | Alpha 2 HS glycoprotein       | 4.0        | 7.0         | 2.0             | <b>4.0</b>      |
| P02088            | Hemoglobin subunit beta 1     | 5.0        | 5.0         | 4.0             | <b>4.0</b>      |
| P22599            | Alpha 1 antitrypsin 1 2       | 6.0        | 5.0         | 4.0             | <b>5.0</b>      |
| P01837            | Ig kappa chain C region       | 3.0        | 3.0         | 3.0             | <b>3.0</b>      |
| P01878            | Ig alpha chain C region       | 3.0        | 3.0         | 3.0             | <b>3.0</b>      |

| P07724-Serum Albumin |     |                 |        |       |     |                                 |                                                                      |                                     |
|----------------------|-----|-----------------|--------|-------|-----|---------------------------------|----------------------------------------------------------------------|-------------------------------------|
| CON                  |     |                 |        |       |     |                                 |                                                                      |                                     |
| Precursor MH+ (Da)   | z   | MH+ Error (ppm) | Score  | Start | End | Sequence                        | Modifications                                                        | BY Matches                          |
| 1866.8033            | 2.8 | -5.5142         | 6.2907 | 589   | 602 | (K)DTCFSTEG PNLVTR(C)           | Carbamidomethyl C (3), AFGP (14)                                     | b2b7*b8b23°y4y21y22°                |
| 1933.8646            | 2.7 | -5.9354         | 6.6197 | 589   | 604 | (K)DTCFSTEG PNLVTRCK(D)         | Carbamidomethyl C(3), Carbamidomethyl C (15), MOLD (16)              | b5b12°b17b17*b18y10°y13°y36         |
| 2107.9854            | 2.9 | 8.3564          | 6.4172 | 585   | 602 | (K)AADKDTC FSTEGPNLVT R(C)      | FL-2H2O (4),Carbamidomethyl C (7)                                    | b2b3y9y11°y18°y19                   |
| 2402.0195            | 2   | -1.5576         | 6.6911 | 570   | 588 | (K)TVMDDFA QFLDTCKAA DK(D)      | Carbamidomethyl C(13), Carbamidomethyl C(14),PYRALINE (15), CML (19) | b1°b10°b14b16b18°b19y14°y19         |
| 2430.1296            | 3.8 | -8.3642         | 6.7438 | 342   | 360 | (K)NYAEAKD VFLGTFLYEYS R(R)     | FL-1H2O (6)                                                          | b6°b7b8°b13*b14b16°b17y4y14y18      |
| 2552.2112            | 2   | 5.6837          | 6.4149 | 525   | 543 | (K)EFKAETFT FHSDICTLPEK (E)     | FL-1H2O(3), Carbamidomethyl C (14), PYRALINE (19)                    | b3b5°b15°y10                        |
| 2574.1475            | 3.4 | -3.1544         | 6.6376 | 131   | 152 | (K)DDNPSLPP FERPEAEAM CTSFK(E)  | MODIC(11), Carbamidomethyl C (18)                                    | b6b9*b11°b14b14°y9°y15°y17          |
| 2755.2102            | 4   | 1.0474          | 7.1541 | 66    | 88  | (K)LVQEVTFD AKTCVADESA ANCDK(S) | FL-2H2O(10), Carbamidomethyl C(12), Carbamidomethyl C (21), CML (23) | b2b3*b7b7°b8b10b11b12b14°y4y4°y5y19 |

| Precursor MH+ (Da) | z   | MH+ Error (ppm) | Score  | Start | End | Sequence                              | Modifications                                                                   | BY Matches                     |
|--------------------|-----|-----------------|--------|-------|-----|---------------------------------------|---------------------------------------------------------------------------------|--------------------------------|
| 818.4096           | 1   | -7.8354         | 6.7092 | 563   | 569 | (K)ATAEQLK (T)                        | CML (7)                                                                         | b2°b7b13°y3y3°y6y9y9°y10y16°   |
| 1491.8286          | 2.1 | 1.1872          | 6.5491 | 361   | 372 | (R)RHPDYSVSLLLR(L)                    | MODIC (12)                                                                      | b3*b6°b8b10*y2y5y6°            |
| 1771.855           | 2.5 | 1.3049          | 6.5554 | 348   | 360 | (K)DVFLGTFLYEYSR(R)                   | AMADORI (13)                                                                    | b2°b3b4°b14°b15y13y16          |
| 2893.3357          | 2.4 | -3.5905         | 6.6078 | 563   | 584 | (K)ATAEQLKTVMDFFAQFLDTCCCK(A)         | CROSSLINE(7), Carbamidomethyl C(20), Carbamidomethyl C(21), MOLD(22)            | b1b7*b8*b9*b9°b10b12b12°y5°y12 |
| 2950.3965          | 2.4 | 7.0709          | 6.6288 | 287   | 309 | (K)YMCENQATISSKLTCCDKPLLK(K)          | Carbamidomethyl C(3), AMADORI(12), Carbamidomethyl C(16), Carbamidomethyl C(17) | b3b6*b15b17*b19*y19y22*        |
| 3668.5854          | 2.8 | -6.4384         | 6.4546 | 123   | 152 | (R)NECFLQHKDDNPSLPPFERPEAEAMC TSFK(E) | Carbamidomethyl C(3), Oxidation M(25), Carbamidomethyl C(26), CML(30)           | b2b2°b3b4°b5b6                 |

## DIAB

| Precursor MH+ (Da) | z | MH+ Error (ppm) | Score  | Start | End | Sequence        | Modifications | BY Matches                      |
|--------------------|---|-----------------|--------|-------|-----|-----------------|---------------|---------------------------------|
| 1096.5997          | 2 | 4.6862          | 7.4552 | 211   | 219 | (K)EKALVSSVR(Q) | PYRALINE (2)  | b2b4*b7b8b12*b15°b20*y10y12y14* |

| Precursor MH+ (Da) | z   | MH+ Error (ppm) | Score  | Start | End | Sequence                                   | Modifications                                                                                                | BY Matches                                          |
|--------------------|-----|-----------------|--------|-------|-----|--------------------------------------------|--------------------------------------------------------------------------------------------------------------|-----------------------------------------------------|
| 1758.7522          | 2   | -2.3694         | 6.5555 | 222   | 233 | (R)MKCSSM<br>QKFGER(A)                     | Carbamidomethyl C (3), AFGP (12)                                                                             | b4°b5b10b10*b12<br>*y2°y5°y6°y7y11                  |
| 2146.0142          | 2.8 | 0.9611          | 6.257  | 453   | 469 | (R)NLGRVGT<br>KCCTLPEDQQR<br>(L)           | IMIDAZOLONEB (4),Carbamidomethyl C(9),<br>Carbamidomethyl C (10)                                             | b1b1°b3b5b15b20<br>b23°y6y9y14°y18°<br>y19°y33      |
| 2186.0222          | 2   | 4.9307          | 6.6114 | 453   | 469 | (R)NLGRVGT<br>KCCTLPEDQQR<br>(L)           | GH1(4),<br>Carbamidomethyl C(9),<br>Carbamidomethyl C(10),<br>IMIDAZOLONEB (17)                              | b5°b18b20°b22b3<br>1y19°y26°y40                     |
| 2204.9775          | 3.3 | 2.175           | 7.0059 | 220   | 233 | (R)QRMKCSS<br>MQKFGER(A)                   | AMADORI(2),<br>Carbamidomethyl C (5), AFGP (10)                                                              | b1°y2y3y4y5y7y9                                     |
| 2549.1487          | 2.8 | 3.8023          | 7.0539 | 528   | 545 | (K)AETTFHHS<br>DICTLPEKEK(Q)               | Carbamidomethyl C (11), AFGP (16),<br>FL-2H2O (18)                                                           | b2°b3°b9b14b19°y<br>13°y13°y17                      |
| 2949.343           | 2.3 | -9.0162         | 6.606  | 258   | 281 | (K)LATDLTKV<br>NKECCHGDLLE<br>CADDR(A)     | CML (7),CML (10),<br>Carbamidomethyl C(12),<br>Carbamidomethyl C(13),<br>Carbamidomethyl C (20)              | b1b10°b13°b14°b<br>15b16°y12°y14y15<br>*y16y18°y23° |
| 3664.7327          | 3   | 0.5629          | 7.0247 | 282   | 309 | (R)AELAKYM<br>CENQATISSK<br>LQTCCDKPLLK(K) | Carbamidomethyl C (8), AFGP (17),<br>Carbamidomethyl C(21),<br>Carbamidomethyl C(22),MODIC (24),<br>CML (28) | b1°b2°b3°y3y4y5y<br>7y9                             |

| Precursor MH+ (Da) | z   | MH+ Error (ppm) | Score  | Start | End | Sequence                                                                  | Modifications                                                                                                                      | BY Matches                              |
|--------------------|-----|-----------------|--------|-------|-----|---------------------------------------------------------------------------|------------------------------------------------------------------------------------------------------------------------------------|-----------------------------------------|
| 3668.587           | 2.8 | -1.89           | 6.8473 | 58    | 88  | (K)CSYDEHAK<br>LVQEVTDFAK<br>TCVADESAA<br>NCDK(S)                         | Carbamidomethyl C (1), MOLD (8), CML(18), arbamidomethyl C(20), Carbamidomethyl C (29)                                             | b1*b5b5*b7b7*b9°y4y8°y9y10              |
| 3926.693           | 3.4 | -1.8023         | 6.8042 | 268   | 298 | (K)ECCHGDLL<br>ECADDRAELA<br>KYMCENQAT<br>ISSK(L)                         | Carbamidomethyl C(2), arbamidomethyl C(3), arbamidomethyl C (10), CROSSLINE (14),Carbamidomethyl C (22)                            | b10*b11*y6°y8°y9°y11                    |
| 4342.035           | 3   | 0.952           | 7.1198 | 491   | 524 | (K)TPVSEHVT<br>KCCSGSLVER<br>RPCFSALTVD<br>ETYVPK(E)                      | FL-2H2O(9), Carbamidomethyl C(10), Carbamidomethyl C (11), AMADORI (18), Carbamidomethyl C (21), FL-1H2O (34)                      | b1b18*b19°b28°y1y4y7°y9y9*y9°y17y23     |
| 4673.2266          | 3.6 | 0.31            | 7.0991 | 29    | 65  | (K)SEIAHRYN<br>DLGEQHFKG<br>LVLIAFSQYLQ<br>KCSYDEHAK(L)                   | CML(16),CML(29), Carbamidomethyl C (30), AMADORI (37)                                                                              | b4b9°b13°b14°b16*b16°y9y10y12y14y14°y16 |
| 6056.5684          | 4   | -2.3601         | 6.7145 | 106   | 152 | (R)ENYGELA<br>DCCTKQEPER<br>NECFLQHKD<br>DNPSLPPFER<br>PEAEAMCTSF<br>K(E) | Carbamidomethyl C(9), Carbamidomethyl C (10), AMADORI (17), Carbamidomethyl C (20), CML (25), AMADORI (36), Carbamidomethyl C (43) | b6°b7b10°                               |

| Precursor MH+ (Da) | z   | MH+ Error (ppm) | Score  | Start | End | Sequence                                                                 | Modifications                                                                                               | BY Matches                                                           |
|--------------------|-----|-----------------|--------|-------|-----|--------------------------------------------------------------------------|-------------------------------------------------------------------------------------------------------------|----------------------------------------------------------------------|
| 6143.768           | 4.7 | 1.3392          | 6.6968 | 123   | 168 | (R)NECFLQH<br>KDDNPSLPPF<br>ERPEAEAMC<br>TSFKENPTTF<br>MGHYLHEVA<br>R(R) | Carbamidomethyl<br>C (3), CROSSLINE<br>(8),CROSSLINE<br>(19),<br>Carbamidomethyl<br>C (26), AMADORI<br>(46) | b1°b3°b9°b22y6°y<br>10°y12y16*y18*y1<br>9y22y24                      |
| 1503.6387          | 2.4 | -5.837          | 6.9805 | 287   | 298 | (K)YMCENQA<br>TISSK(L)                                                   | Carbamidomethyl<br>C (3), CEL (12)                                                                          | b13b17b28°y13y1<br>6°                                                |
| 1584.7177          | 2   | -3.7378         | 6.9824 | 220   | 229 | (R)QRMKCSS<br>MQK(F)                                                     | MOLD<br>(2),CROSSLINE (4),<br>Carbamidomethyl<br>C (5)                                                      | b5°b6°b16b23°y22<br>*                                                |
| 1749.862           | 2.4 | -7.9845         | 7.0704 | 422   | 434 | (K)LGEYGFQ<br>NAILVR(Y)                                                  | AFGP (13)                                                                                                   | b5b9°b12°b16°y4°<br>y6y6°y7°y9°y16                                   |
| 1771.8674          | 2   | 8.7118          | 6.7723 | 348   | 360 | (K)DVFLGTFL<br>YEYSR(R)                                                  | AMADORI (13)                                                                                                | b1b2b4°b7°b14b1<br>8b32*y7°y8y10y15<br>*y20*y38°                     |
| 2072.018           | 2   | -6.611          | 6.8931 | 348   | 361 | (K)DVFLGTFL<br>YEYSRR(H)                                                 | CROSSLINE(13),<br>MGH1 (14)                                                                                 | b1°b7°b10y2y6°y1<br>0y11°y15°                                        |
| 2107.9785          | 2.9 | 2.1264          | 6.9382 | 585   | 602 | (K)AADKDTC<br>FSTEGPNLVT<br>R(C)                                         | FL-2H2O(4),<br>Carbamidomethyl<br>C (7)                                                                     | b3°b4°b7°b8°b10*<br>b11*b13°b16y4y1<br>7                             |
| 2306.0432          | 3   | -1.7049         | 6.7467 | 585   | 602 | (K)AADKDTC<br>FSTEGPNLVT<br>R(C)                                         | AMADORI(4),<br>Carbamidomethyl<br>C(7),AMADORI (18)                                                         | b10°b20b25y20y2<br>0°y26*y27                                         |
| 2340.107           | 2.8 | 1.4396          | 6.9291 | 29    | 44  | (K)SEIAHRYN<br>DLGEQHFK(G<br>)                                           | CROSSLINE (6),<br>FL-1H2O (16)                                                                              | b2b5b5*b6b9°b10<br>°b12b15*y4°y15*y<br>17                            |
| 2495.1912          | 2   | -2.1297         | 6.5851 | 224   | 242 | (K)CSSMQKF<br>GERAFKAWA<br>VAR(L)                                        | Carbamidomethyl<br>C (1), MOLD (6),<br>AMADORI (10),<br>MGH1 (19)                                           | b2b4b7°b13°b14b<br>14°b17°b21°b22b3<br>5b37b44*y4y5y8°<br>y10y21*y32 |



| Precursor MH+ (Da) | z   | MH+ Error (ppm) | Score  | Start | End | Sequence                          | Modifications                                                                                      | BY Matches                                                             |
|--------------------|-----|-----------------|--------|-------|-----|-----------------------------------|----------------------------------------------------------------------------------------------------|------------------------------------------------------------------------|
| 2767.4863          | 3.7 | 2.6377          | 6.7972 | 362   | 383 | (R)HPDYVSLLRLAKYEATLEK(C)         | FL-1H20(14), MOLD (15)                                                                             | b2b2°b3*b5*b9*b13b15°b18*b19*b33*y5°y9°y10y10°y15y15°y17y17*y19y22y30° |
| 2835.3513          | 3   | -1.8363         | 6.6609 | 24    | 44  | (R)REAHKSEIAHRYNDLGEQHF(K)        | AFGP (5)                                                                                           | b3b15°b16°b17*b19*b25°y11°y12y13*y17*y18*y22*y26                       |
| 3347.56            | 3.5 | 2.765           | 6.7598 | 559   | 584 | (K)HKPKATAEQLKTVMDDFAQFLDTCCCK(A) | FL-1H20(2), MOLD (11), Carbamidomethyl C(24), Carbamidomethyl C (25), CEL (26)                     | b1*b5b6°b10b14*y8                                                      |
| 3462.6255          | 6   | -9.7345         | 6.8861 | 282   | 309 | (R)AELAKYMCENQATISSKLQTCCKPLLK(K) | FL-2H2O(5), Carbamidomethyl C(8), Carbamidomethyl C(21), Carbamidomethyl C(22),MODIC (24)          | b1b3°y1y9°y13y19y22y34                                                 |
| 3698.828           | 3.6 | 8.5244          | 7.0666 | 282   | 310 | (R)AELAKYMCENQATISSKLQTCCKPLLK(A) | MODIC(5), Carbamidomethyl C(8), Carbamidomethyl C(21), Carbamidomethyl C(22),CEL(24), AMADORI (28) | b4b7b11°b12b14b16°b18b19b24b25°y17y17*y29                              |

| DIAB HYD           |     |                 |        |       |     |                                                             |                                                                           |                                                   |
|--------------------|-----|-----------------|--------|-------|-----|-------------------------------------------------------------|---------------------------------------------------------------------------|---------------------------------------------------|
| Precursor MH+ (Da) | z   | MH+ Error (ppm) | Score  | Start | End | Sequence                                                    | Modifications                                                             | BY Matches                                        |
| 1473.8105          | 3   | -2.3127         | 0      | 361   | 372 | (R)RHPDYSV<br>SLLLR(L)                                      | MODIC (1)                                                                 | b6y9                                              |
| 1491.8207          | 2.1 | -3.3577         | 6.3479 | 361   | 372 | (R)RHPDYSV<br>SLLLR(L)                                      | MODIC (12)                                                                | b4°b10°b11°b12y9<br>y11°y12                       |
| 2144.1128          | 3   | 4.9031          | 6.1373 | 422   | 438 | (K)LGEYGFQ<br>NAILVRYTQK<br>(A)                             | FL-1H20 (17)                                                              | b1b4b6°b12°b13<br>b14°b16*y4°y11<br>y13°          |
| 2326.1355          | 2.1 | -0.9392         | 6.8673 | 342   | 360 | (K)NYAEAKD<br>VFLGTFLYEYS<br>R(R)                           | GH1 (19)                                                                  | b1*b2b3*b4°b5b<br>9*b13b15*b19y4<br>y6y19         |
| 2375.3308          | 2.8 | 4.6632          | 6.6056 | 544   | 558 | (K)EKQIKK<br>QTALAEV<br>K(H)                                | FL-1H20 (2),<br>CROSSLINE (5),<br>CROSSLINE (15)                          | b3*b4°b5°b6°b7<br>b15y4y5°y13y14°<br>y15          |
| 4673.24            | 3.7 | -3.5962         | 6.9516 | 509   | 545 | (R)RPCFSAL<br>TVDETYVP<br>KEFKAETFT<br>FHSDICTLP<br>EKEK(Q) | Carbamidomethyl<br>C (3), CROSSLINE<br>(16),<br>Carbamidomethyl<br>C (30) | b12b13°y3y4°y5y<br>5°y6y10°y11°y12<br>y16y18°y37  |
| 1682.8588          | 2   | 2.7122          | 6.8713 | 559   | 569 | (K)HKPKAT<br>AEQLK(T)                                       | AFGP (2),<br>AMADORI (11)                                                 | b5b8°b10y2y4y6<br>y6*y8y10y10*                    |
| 1965.9017          | 2   | -0.4196         | 6.8898 | 220   | 233 | (R)QRMKC<br>SSMQKFGE<br>R(A)                                | Carbamidomethyl<br>C (5), FL-1H20<br>(10), MOLD (14)                      | b6°b9b11°b13°b<br>14y8y14                         |
| 2051.9634          | 2   | 3.0029          | 6.6188 | 282   | 298 | (R)AELAKY<br>MCENQATI<br>SSK(L)                             | Carbamidomethyl<br>C (8), PYRALINE<br>(17)                                | b3°b9b13b13°b1<br>4b14°b15°y2°y3y<br>5°y6°y8*y15° |
| 2107.9785          | 3   | 8.7216          | 6.7388 | 585   | 602 | (K)AADKDT<br>CFSTEGPNL<br>VTR(C)                            | FL-2H2O (4),<br>Carbamidomethyl<br>C (7)                                  | b4°b12b13y1y14<br>y15y17y18                       |

| Precursor MH+ (Da) | z   | MH+ Error (ppm) | Score  | Start | End | Sequence                                              | Modifications                                                     | BY Matches                                                           |
|--------------------|-----|-----------------|--------|-------|-----|-------------------------------------------------------|-------------------------------------------------------------------|----------------------------------------------------------------------|
| 2156.9148          | 2   | 1.3959          | 6.6526 | 106   | 122 | (R)ENYGEL<br>ADCCTKQE<br>PER(N)                       | Carbamidomethyl<br>C (9),<br>Carbamidomethyl<br>C (10), CML (12)  | b1b1°b2*b4y1y3<br>°y4y4°y5y8y12*y<br>13y17                           |
| 2324.1873          | 2.7 | 2.9061          | 6.9363 | 422   | 438 | (K)LGEYGF<br>QNAILVRYT<br>QK(A)                       | AMADORI (13),<br>AMADORI (17)                                     | b1b5b6b6°b8b10<br>°b11°b15b16y3y<br>3*y6y16y17                       |
| 2441.1675          | 3.2 | 2.4336          | 7.1488 | 224   | 242 | (K)CSSMQK<br>FGERAFKA<br>WAVAR(L)                     | Carbamidomethyl<br>C (1), AMADORI<br>(10), MOLD (13)              | b1b15b15*b17b<br>18°y12y15°y16°y<br>17y19y19*                        |
| 2689.2488          | 3   | 0.596           | 6.7499 | 585   | 608 | (K)AADKDT<br>CFSTEGPNL<br>VTRCKDAL<br>A(-)            | Carbamidomethyl<br>C (7), MOLD (18),<br>Carbamidomethyl<br>C (19) | b11b11°b15b16°<br>b18b24y5°y7y8°                                     |
| 3251.6814          | 5   | -7.6862         | 6.7073 | 1     | 24  | (-<br>)MKWVTF<br>LLFVSGSA<br>FSRQVFR<br>E             | CROSSLINE (2),<br>GH1 (23),<br>IMIDAZOLONEB<br>(24)               | b16°b18b24°y7°y<br>10°y11y11°y14y1<br>7y19y21y22y24                  |
| 4299.9644          | 3.8 | 1.1793          | 7.0175 | 35    | 65  | (R)YNDLGE<br>QHFKGLVLI<br>AFSQYLQK<br>CSYDEHAK(<br>L) | AFGP (10), AFGP<br>(23),<br>Carbamidomethyl<br>C (24), CML (31)   | b2*b3°b4*b5°b1<br>1b12*b13b17b2<br>0*b21y2y13*y14<br>y19*y20°y25°y31 |

### DIAB AMG

| Precursor MH+ (Da) | z | MH+ Error (ppm) | Score  | Start | End | Sequence                          | Modifications                      | BY Matches                                        |
|--------------------|---|-----------------|--------|-------|-----|-----------------------------------|------------------------------------|---------------------------------------------------|
| 1758.7463          | 2 | -7.832          | 6.7035 | 222   | 233 | (R)MKCSSM<br>QKFGER(A)            | Carbamidomethyl<br>C (3), AFGP (8) | b4°b5b6b7*b9y<br>1y2y2°y7y8°y9°                   |
| 2326.136           | 2 | -3.9519         | 6.8825 | 342   | 360 | (K)NYAEAK<br>DVFLGTFLY<br>EYSR(R) | GH1 (19)                           | b1b1*b6°b9b10<br>*b11*b16*y2°y3<br>°y10y13y14y17° |

| Precursor MH+ (Da) | z   | MH+ Error (ppm) | Score  | Start | End | Sequence                                                                      | Modifications                                                                                                                                                        | BY Matches                                       |
|--------------------|-----|-----------------|--------|-------|-----|-------------------------------------------------------------------------------|----------------------------------------------------------------------------------------------------------------------------------------------------------------------|--------------------------------------------------|
| 2372.2427          | 2.4 | 9.0396          | 6.3036 | 237   | 257 | (K)AWAVAR<br>LSQTFPNAD<br>FAEITK(L)                                           | MODIC (6)                                                                                                                                                            | b11b12b15°b21<br>*y3y4°y9*y11*y<br>20°y21        |
| 2893.3555          | 2.2 | -6.2956         | 6.6295 | 563   | 584 | (K)ATAEQLK<br>TVMDDFAQ<br>FLDTCK(A)                                           | CROSSLINE (7),<br>Carbamidomethyl<br>C (20),<br>Carbamidomethyl<br>C (21), MOLD (22)                                                                                 | b2°b6b12*b15°b<br>18*b20*b22y5y<br>7y9y13y14y14* |
| 3497.653           | 3.7 | -3.971          | 6.7539 | 410   | 434 | (K)NLVKTN<br>CDLYEKLGE<br>YGFQNAILV<br>R(Y)                                   | AFGP (4),<br>Carbamidomethyl<br>C (7), AFGP (25)                                                                                                                     | b1b4b5b9b9*b1<br>1b15°b21y6y8*y<br>12°           |
| 5944.5356          | 4   | -1.0925         | 6.4776 | 106   | 152 | (R)ENYGEL<br>ADCCTKQE<br>PERNECFLO<br>HKDDNPSL<br>PPFERPEAE<br>AMCTSFK(E<br>) | Carbamidomethyl<br>C (9),<br>Carbamidomethyl<br>C (10), FL-2H2O<br>(12),<br>Carbamidomethyl<br>C (20), MODIC<br>(25),<br>Carbamidomethyl<br>C (43), PYRALINE<br>(47) | b1b3b3°b5b9b1<br>2°b16b21*y10°y<br>13y15°y23     |
| 1096.6007          | 2   | 9.3827          | 6.8003 | 211   | 219 | (K)EKALVSS<br>VR(Q)                                                           | PYRALINE (2)                                                                                                                                                         | b3°y3y4y5y7y9                                    |
| 1706.918           | 2   | -2.0708         | 6.5592 | 211   | 223 | (K)EKALVSS<br>VRQRMK(C)                                                       | MOLD (9),<br>FL-2H2O (13)                                                                                                                                            | b3°b4°y5y6y8y1<br>3*                             |
| 1928.0092          | 3   | 4.5611          | 6.4978 | 211   | 223 | (K)EKALVSS<br>VRQRMK(C)                                                       | CEL (2),<br>AMADORI (9),<br>AMADORI (13)                                                                                                                             | b1b11°y4y5y6y7<br>y11*y13                        |
| 1965.9097          | 2   | 4.2737          | 6.7605 | 220   | 233 | (R)QRMKCS<br>SMQKFGER<br>(A)                                                  | FL-1H2O (4),<br>Carbamidomethyl<br>C (5), MOLD (10)                                                                                                                  | b3b8°b9b10b11<br>b13*y5y7y11y14                  |
| 2035.9542          | 2.6 | 7.4584          | 6.5716 | 585   | 602 | (K)AADKDT<br>CFSTEGPNL<br>VTR(C)                                              | Carbamidomethyl<br>C (7), MGH1 (18)                                                                                                                                  | b4b4°b5b6°b16*<br>y2°y6y14                       |

| Precursor MH+ (Da) | z   | MH+ Error (ppm) | Score  | Start | End | Sequence                                              | Modifications                                                                                                                        | BY Matches                                                               |
|--------------------|-----|-----------------|--------|-------|-----|-------------------------------------------------------|--------------------------------------------------------------------------------------------------------------------------------------|--------------------------------------------------------------------------|
| 2204.9785          | 3.3 | 7.3815          | 6.6078 | 220   | 233 | (R)QRMKCS<br>SMQKFGER<br>(A)                          | AMADORI (2),<br>Carbamidomethyl<br>C (5), AFGP (10)                                                                                  | b2*b6*b7b7°y4y<br>10y11y11°y14                                           |
| 2340.1062          | 2.8 | 7.7565          | 6.6117 | 29    | 44  | (K)SEIAHRY<br>NDLGEQHF<br>K(G)                        | CROSSLINE (6),<br>FL-1H20 (16)                                                                                                       | b5°b15°b16y5°y<br>6y8y9*y10y12*y<br>14°y16                               |
| 2448.2021          | 2.4 | 0.9207          | 6.5614 | 342   | 360 | (K)NYAEAK<br>DVFLGTFLY<br>EYSR(R)                     | AMADORI (19)                                                                                                                         | b2*b3*b6*b7°b<br>9*b11°b12b12*<br>b13y2y2°y4°y11<br>y11°                 |
| 2684.209           | 2.3 | -5.635          | 6.9304 | 585   | 604 | (K)AADKDT<br>CFSTEGPNL<br>VTRCK(D)                    | FL-1H20 (4),<br>Carbamidomethyl<br>C (7), AMADORI<br>(18),<br>Carbamidomethyl<br>C (19), PYRALINE<br>(20)                            | b3b4°b5b14b15<br>b19y8*y10*y10°<br>y16°y20                               |
| 2949.341           | 2.4 | 1.2403          | 6.9858 | 265   | 286 | (K)VNKECC<br>HGDLLCA<br>DDRAELAK(<br>Y)               | FL-2H20 (3),<br>Carbamidomethyl<br>C (5),<br>Carbamidomethyl<br>C (6),<br>Carbamidomethyl<br>C (13), AMADORI<br>(17), CML (22)       | b3b3*b4*b7b11<br>b11°b12*b15b1<br>6*b17°b20°b22y<br>11y12y12°y16°y<br>22 |
| 3851.9102          | 3   | 3.6042          | 6.5988 | 45    | 75  | (K)GLVLI AF<br>SQYLQKCSY<br>DEHAKLVQ<br>EVTDFAK(T)    | FL-1H20 (13),<br>Carbamidomethyl<br>C (14), MOLD<br>(21), CML (31)                                                                   | b3b19°b21*y6y8<br>°y12y14°y18°                                           |
| 3926.676           | 3.4 | 0.2916          | 6.6473 | 268   | 298 | (K)ECCHGD<br>LLECADDRA<br>ELAKYMCE<br>NQATISSK(L<br>) | Carbamidomethyl<br>C (2),<br>Carbamidomethyl<br>C (3),<br>Carbamidomethyl<br>C (10), CROSSLINE<br>(19),<br>Carbamidomethyl<br>C (22) | b16°y2y6°y9*y1<br>1y20y31                                                |

| Precursor MH+ (Da) | z | MH+ Error (ppm) | Score  | Start | End | Sequence                                                  | Modifications                                                                                                                                                              | BY Matches                                                                 |
|--------------------|---|-----------------|--------|-------|-----|-----------------------------------------------------------|----------------------------------------------------------------------------------------------------------------------------------------------------------------------------|----------------------------------------------------------------------------|
| 4445.003           | 3 | 8.8284          | 6.6688 | 118   | 152 | (K)QEPERN<br>ECFLQHKD<br>DNPSLPPFE<br>RPEAEAMC<br>TSFK(E) | MODIC (5),<br>Carbamidomethyl<br>C (8), MOLD (24),<br>Carbamidomethyl<br>C (31), FL-2H2O<br>(35)                                                                           | b11b13*b14*b1<br>8°b19b20°b23b2<br>4b35*y2y3°y11y<br>12°y20y20°y34°y<br>35 |
| 4732.0825          | 3 | 4.0024          | 6.7172 | 570   | 604 | (K)TVMDDF<br>AQFLDTCKK<br>AADKDTCFK<br>TEGPNLVTR<br>CK(D) | Carbamidomethyl<br>C (13),<br>Carbamidomethyl<br>C (14), FL-2H2O<br>(15), CROSSLINE<br>(19),<br>Carbamidomethyl<br>C (22),<br>Carbamidomethyl<br>C (34), CROSSLINE<br>(35) | b22y5y7°y13*y1<br>5*y16y24*y35                                             |

**Q06890- Clusterin****CON**

| Precursor MH+ (Da) | z    | MH+ Error (ppm) | Score  | Start | End | Sequence                                                      | Modifications                  | BY Matches                                                                 |
|--------------------|------|-----------------|--------|-------|-----|---------------------------------------------------------------|--------------------------------|----------------------------------------------------------------------------|
| 1749.8616          | 2    | 9.593           | 4.9579 | 429   | 442 | (K)FMDTVAE<br>KALQEYR(R)                                      | MOLD (8)                       | b2b3°b4b5b7°b1<br>1b11°b14°y2y3°y<br>7y13*                                 |
| 2004.0444          | 2.04 | 4.5385          | 5.3612 | 336   | 350 | (R)LTEQYKELL<br>QSFQSK(M)                                     | AMADORI (6)                    | b1b2°b5°b6b9b9<br>*b11b11°b14°b1<br>5°y5°y6°y10y10<br>*y11°y13°y14y15<br>* |
| 4641.221           | 3    | -8.9264         | 4.5787 | 342   | 380 | (K)ELLQSFQS<br>KMLNTSSLLE<br>QLNDQFNW<br>VSQLANLTQG<br>EDK(Y) | CEL (9), CEL (39)              | b5°b5°b13°b18b<br>19°b24°b25b29°<br>b35°y2y4y7*                            |
| 1488.6884          | 2    | 0.4433          | 5.0579 | 425   | 436 | (K)DNPKFMD<br>TVAEK(A)                                        | MODIC (4), CML<br>(12)         | b3°b5°b6b7b7°b<br>7°b8b8°b10°b11<br>y3°y4°y8°y11*                          |
| 1950.9803          | 2.92 | 1.036           | 5.4862 | 182   | 197 | (R)ASGIIDTLF<br>QDRFFAR(E)                                    | GH1 (12), MGH1<br>(16)         | b3°b4b10b14°b1<br>6b16°y2y3y10y1<br>6                                      |
| 4286.9995          | 3.37 | 3.442           | 5.4659 | 130   | 166 | (R)SGSGLVG<br>QQLEEFNLQS<br>SPFYFWMNG<br>DRIDSLLES DR<br>(Q)  | Oxidation M (24),<br>MOLD (37) | b9b16b22b24°y1<br>1y13y14°y21°y2<br>7°y33*                                 |

**DIAB**

| Precursor MH+ (Da) | z    | MH+ Error (ppm) | Score  | Start | End | Sequence                       | Modifications                                                                                   | BY Matches                       |
|--------------------|------|-----------------|--------|-------|-----|--------------------------------|-------------------------------------------------------------------------------------------------|----------------------------------|
| 1843.8785          | 2    | 2.7392          | 4.664  | 79    | 93  | (K)KKEDALED<br>TRDSEM(L)       | MOLD (15)                                                                                       | b3°b6b11°b13b1<br>8b22y3y5y8y25° |
| 2004.0127          | 2.04 | 7.0849          | 5.2008 | 44    | 56  | (K)EIQNAVQ<br>GVKHIK(T)        | AFGP (10), AFGP<br>(13)                                                                         | b9b15°b23°y1y3<br>y4y8y9°y21*    |
| 2005.952           | 2    | 1.6904          | 5.0775 | 80    | 95  | (K)KEDALEDT<br>RDSEM(LK(A<br>) | GH1 (9), CML (14)                                                                               | b2°b3b5b5°b12°<br>y1y10y13       |
| 2020.0076          | 4    | -1.0728         | 5.6379 | 282   | 296 | (R)TVCKEIRR<br>NSTGCLK(M)      | Carbamidomethyl<br>C (3), FL-2H2O (4),<br>MODIC (7),<br>MODIC (8),<br>Carbamidomethyl<br>C (13) | b4°b6b7°b8b11°<br>b15b16°y13     |

| Precursor MH+ (Da) | z    | MH+ Error (ppm) | Score  | Start | End | Sequence                                           | Modifications                                                                                                                          | BY Matches                                              |
|--------------------|------|-----------------|--------|-------|-----|----------------------------------------------------|----------------------------------------------------------------------------------------------------------------------------------------|---------------------------------------------------------|
| 3071.399           | 2.69 | -7.6583         | 5.3331 | 158   | 181 | (R)IDSLLESDR<br>QQSQVLDAM<br>QDSFAR(A)             | AFGP (9), MOLD (24)                                                                                                                    | b6*y3y5y5*                                              |
| 4343.9546          | 3    | 5.2083          | 5.0806 | 290   | 323 | (R)NSTGCLK<br>MKGQCEKQ<br>EILSVCSTN<br>NPAQANLR(Q) | Carbamidomethyl C (5), FL-2H2O (9), Carbamidomethyl C (12), FL-1H2O (14), Carbamidomethyl C (15), Carbamidomethyl C (23), AMADORI (34) | b2°b3°b4°b5°b6b10°y7°y11°y13                            |
| 1230.6302          | 2    | 5.1885          | 4.7573 | 289   | 298 | (R)RNSTGCLK<br>MK(G)                               | Carbamidomethyl C (6), MODIC (8)                                                                                                       | b2°b3°b6°b12b22°y3y5y14*y23°y25°                        |
| 1446.7733          | 2    | -4.3847         | 4.8878 | 57    | 67  | (K)TLIEKTNAE<br>RK(S)                              | FL-1H2O (11)                                                                                                                           | b1b2b2°b3°b6b8b10y3y8°                                  |
| 1591.833           | 2    | 6.7419          | 4.8668 | 68    | 78  | (K)SLLNSLEEA<br>KK(K)                              | CROSSLINE (10), PYRALINE (11)                                                                                                          | b3°b5b6°b11°b13b13°y9                                   |
| 1746.8374          | 2.73 | -1.1664         | 5.3996 | 78    | 88  | (K)KKKEDALE<br>DTR(D)                              | AFGP (1), FL-1H2O (3)                                                                                                                  | b8b9°b10°y5y8y11                                        |
| 1749.8558          | 2.41 | 6.8692          | 5.4799 | 429   | 442 | (K)FMDTVAE<br>KALQEYR(R)                           | MOLD (8)                                                                                                                               | b2*b3*b4b7                                              |
| 1844.8724          | 3    | 7.8965          | 5.12   | 81    | 95  | (K)EDALEDTR<br>DSEMCLK(A)                          | MOLD (8), Oxidation M (12)                                                                                                             | b2*b4*b7°b9°b13y2                                       |
| 1952.892           | 2    | -0.6529         | 5.584  | 289   | 303 | (R)RNSTGCLK<br>MKGQCEK(C)                          | Carbamidomethyl C (6), MOLD (8), MOLD (10), Carbamidomethyl C (13), CML (15)                                                           | b2*b2°b4b6°b7b8b14°y9*y13*y13°y14°y15*                  |
| 1956.0381          | 2.88 | -0.9696         | 5.4333 | 67    | 79  | (R)KLLNSLEE<br>AKKK(K)                             | FL-1H2O (1), AMADORI (12), AMADORI (13)                                                                                                | b6*b7y4*y6y7*y10*y10°y11y11°y15y15*                     |
| 2031.9637          | 2.9  | 0.3977          | 5.3866 | 81    | 95  | (K)EDALEDTR<br>DSEMCLK(A)                          | CROSSLINE (8)                                                                                                                          | b1b2b4b6°b10y6°y8°y9y12°                                |
| 2173.0334          | 2.07 | 9.2055          | 5.2892 | 79    | 93  | (K)KKEDALE<br>TRDSEM(L)                            | FL-2H2O (1), CROSSLINE (10)                                                                                                            |                                                         |
| 2366.1177          | 3    | -1.7232         | 5.2695 | 425   | 442 | (K)DNPKFMD<br>TVAEKALQEY<br>R(R)                   | FL-2H2O (4), MODIC (12), MOLD (18)                                                                                                     | b4°b10°b12°b13°b18°b19°b20y4y4°y9y9*y9°y10*y13y14y22y24 |



| DIAB HYD           |      |                 |        |       |     |                                |                                                                                 |                                                                                                    |
|--------------------|------|-----------------|--------|-------|-----|--------------------------------|---------------------------------------------------------------------------------|----------------------------------------------------------------------------------------------------|
| Precursor MH+ (Da) | z    | MH+ Error (ppm) | Score  | Start | End | Sequence                       | Modifications                                                                   | BY Matches                                                                                         |
| 1829.9729          | 2    | -5.2503         | 5.2246 | 68    | 80  | (K)SLLNSLEEA<br>K K K K(E)     | PYRALINE (10),<br>CEL (11),<br>AMADORI (12)                                     | b3*b5b5*b13y3y<br>3°y5°y8°                                                                         |
| 1854.8771          | 2    | 3.2269          | 4.7054 | 289   | 303 | (R)RNSTGCLK<br>MKGQCEK(C)      | Carbamidomethyl<br>C (6), CML (8),<br>Carbamidomethyl<br>C (13)                 | b7b13°b15y2°y3°<br>y5°y9°y21*y21°y<br>22                                                           |
| 1862.9337          | 2    | 7.7515          | 5.2221 | 286   | 298 | (K)EIRRNSTG<br>CLKMK(G)        | AMADORI (3),<br>Carbamidomethyl<br>C (9), PYRALINE<br>(13)                      | b2b3b3°b8b12°y<br>5y6°y9*y13                                                                       |
| 1881.888           | 3    | 3.0346          | 5.1764 | 289   | 303 | (R)RNSTGCLK<br>MKGQCEK(C)      | Carbamidomethyl<br>C (6), MODIC (8),<br>MOLD (10),<br>Carbamidomethyl<br>C (13) | b2b3b3*b5b10°b<br>12y3y5*y7°y11*y<br>14*                                                           |
| 2001.0573          | 2    | 5.9141          | 4.8829 | 62    | 77  | (K)TNAERKSL<br>LNSLEEAK(K)     | MODIC (6),<br>AMADORI (16)                                                      | b1b5°b10*b13*b<br>15*b18°b36°y3*y<br>3°y4y5y9°y10y13<br>°y14°y17*y22*y2<br>3y25°y29y32°y36<br>y36* |
| 2004.0186          | 2.05 | -4.7709         | 4.8765 | 336   | 350 | (R)LTEQYKELL<br>QSFQSK(M)      | FL-2H2O (6),<br>MODIC (15)                                                      | b1°b2°b3°b4b4°b<br>6b6°b7°b9°y2y6y<br>8y10y12°                                                     |
| 2004.019           | 2.03 | -6.1182         | 5.4377 | 336   | 350 | (R)LTEQYKELL<br>QSFQSK(M)      | AMADORI (6)                                                                     | b1b5°b10*b13*b<br>15*b18°b36°y3*y<br>3°y4y5y9°y10y13<br>°y14°y17*y22*y2<br>3y25°y29y32°y36<br>y36* |
| 2020.0009          | 4    | 2.8876          | 5.5019 | 282   | 296 | (R)TVCKEIRR<br>NSTGCLK(M)      | Carbamidomethyl<br>C (3), FL-2H2O (4),<br>Carbamidomethyl<br>C (13), CEL (15)   | b2b3b3*b5b10°b<br>12y3y5*y7°y11*y<br>14*                                                           |
| 2196.087           | 2    | -0.268          | 5.0335 | 80    | 95  | (K)KEDALEDT<br>RDSEMCLK(A<br>) | CROSSLINE (1),<br>MODIC (14)                                                    | b1b7b9°b14b16°<br>b17°b19°b22*b2<br>4*b25b32°y2y12°<br>y14y16y16°y17*y<br>20y22*y23°y29y<br>39°    |

| Precursor MH+ (Da) | z    | MH+ Error (ppm) | Score  | Start | End | Sequence                                               | Modifications                                                    | BY Matches                                                  |
|--------------------|------|-----------------|--------|-------|-----|--------------------------------------------------------|------------------------------------------------------------------|-------------------------------------------------------------|
| 2199.0874          | 3    | 9.5199          | 4.4945 | 62    | 77  | (K)TNAERKSL<br>LNSLEEAK(K)                             | AFGP (6), FL-2H2O (16)                                           | b5b5°b6°b7°b8b<br>9b10°b12y5y5*y<br>6y6*y11°y14*y1<br>5y15* |
| 3942.8345          | 3    | 6.6886          | 4.9911 | 304   | 335 | (K)CQEILSVD<br>CSTNNPAQA<br>NLRQELNDSL<br>QVAER(L)     | Carbamidomethyl<br>C (1),<br>Carbamidomethyl<br>C (9), AFGP (20) | b6b6°b11b12*y4<br>y10*y14*                                  |
| 4216.9736          | 4.69 | -8.4916         | 5.0656 | 158   | 193 | (R)IDSLLESDR<br>QQSQVLDAM<br>QDSFARASGII<br>DTLFQDR(F) | GH1 (9), MGH1<br>(24), MGH1 (36)                                 | b14°b16b18°b20°<br>b21b22y10°y12y<br>15°y22                 |

### DIAB AMG

| Precursor MH+ (Da) | z    | MH+ Error (ppm) | Score  | Start | End | Sequence                       | Modifications                                                                          | BY Matches                                                     |
|--------------------|------|-----------------|--------|-------|-----|--------------------------------|----------------------------------------------------------------------------------------|----------------------------------------------------------------|
| 1980.9254          | 2    | 5.2988          | 5.6041 | 289   | 303 | (R)RNSTGCLK<br>MKGQCEK(C)      | GH1 (1),<br>Carbamidomethyl<br>C (6), CEL (10),<br>Carbamidomethyl<br>C (13), CEL (15) | b3*b4*b8b11b16<br>y3°y6°y17*                                   |
| 1503.8325          | 2    | 5.7965          | 4.6342 | 67    | 78  | (R)KLLNSLEE<br>AKK(K)          | MODIC (1),<br>PYRALINE (11)                                                            | b3°b4b5*b5°b12<br>b13°b16b19°y1<br>2y3y5*y9°y10y13<br>y14*y16° |
| 1587.8127          | 2.35 | 5.583           | 4.5024 | 182   | 193 | (R)ASGIIDTLF<br>QDR(F)         | CROSSLINE (12)                                                                         | b10°b17y5°y6°y1<br>2*y17                                       |
| 1772.8964          | 2.68 | 0.1263          | 4.8731 | 286   | 298 | (K)EIRRNSTG<br>CLKMK(G)        | MODIC (4),<br>Carbamidomethyl<br>C (9), FL-1H2O (13)                                   | b6*b8°b15b18y4<br>y10*                                         |
| 1790.9012          | 2    | -8.2198         | 5.1708 | 286   | 298 | (K)EIRRNSTG<br>CLKMK(G)        | Carbamidomethyl<br>C (9), MODIC (11),<br>AMADORI (13)                                  | b1b14°y3y6y9*                                                  |
| 1952.9645          | 3    | 2.5724          | 5.0535 | 286   | 298 | (K)EIRRNSTG<br>CLKMK(G)        | AMADORI (3),<br>Carbamidomethyl<br>C (9), MODIC (11),<br>AMADORI (13)                  | b1b6°b7b9°b11°<br>b12y8y12                                     |
| 1986.0089          | 2    | -7.2779         | 5.2383 | 336   | 350 | (R)LTEQYKELL<br>QSFQSK(M)      | FL-1H2O (15)                                                                           | b5b18b23°y3y5y<br>5*y12y16°                                    |
| 2004.0193          | 2.04 | -10.1901        | 5.0675 | 336   | 350 | (R)LTEQYKELL<br>QSFQSK(M)      | AMADORI (15)                                                                           | b7°b10*b11*y1y<br>4°y5y7°y12                                   |
| 2005.9592          | 2    | -5.8909         | 5.1115 | 80    | 95  | (K)KEDALEDT<br>RDSEMCLK(A<br>) | MOLD (14), MOLD<br>(16)                                                                | b4b8b10b10°b11<br>°b16°y11y11°y12<br>°y13                      |

| Precursor MH+ (Da) | z    | MH+ Error (ppm) | Score  | Start | End | Sequence                       | Modifications                                                        | BY Matches                 |
|--------------------|------|-----------------|--------|-------|-----|--------------------------------|----------------------------------------------------------------------|----------------------------|
| 2019.9972          | 4    | 1.0064          | 5.5872 | 282   | 296 | (R)TVCKEIRR<br>NSTGCLK(M)      | Carbamidomethyl C (3), FL-1H2O (4), MGH1 (8), Carbamidomethyl C (13) | b3°b7°b9°b12y1y6y9°y15°y16 |
| 2031.9608          | 2.91 | 3.4045          | 5.1365 | 80    | 95  | (K)KEDALEDT<br>RDSEMCLK(A<br>) | Oxidation M (13), PYRALINE (14)                                      | b10b15y6y9°y10y14y15       |

**P06728-Apolipoprotein A IV**

**CON**

| Precursor MH+ (Da) | z    | MH+ Error (ppm) | Score  | Start | End | Sequence                                                  | Modifications                 | BY Matches                                                    |
|--------------------|------|-----------------|--------|-------|-----|-----------------------------------------------------------|-------------------------------|---------------------------------------------------------------|
| 1479.7511          | 1.94 | -2.1372         | 5.1467 | 248   | 259 | (K)NAEELQTK<br>VSAK(I)                                    | AMADORI (8)                   | b2b3*b3*b4*b5*b6*b8b9b11b12y9y12                              |
| 1853.928           | 2.73 | 6.6022          | 5.5618 | 280   | 294 | (K)GNTEGLQ<br>KSLEDLNR(Q)                                 | FL-1H20 (8),<br>MODIC (15)    | b4b5b6b10*b12b13y1y2*y3y4y5y9y9°y13*y15                       |
| 3581.7637          | 3.66 | -3.4277         | 4.8743 | 317   | 345 | (K)ALVQQLE<br>QFRQQLGPN<br>SGEVESHLSFL<br>EK<br>(S)       | AFGP (10)                     | b5*b6b7*b11*b12*b16b16°b21*b24b26°b27°y1y2°y14y14*y17*y25°y29 |
| 4397.198           | 4    | 2.7952          | 4.9487 | 131   | 163 | (K)LQEHLKPY<br>AVDLQDQINT<br>QTQEMKLQL<br>TPYIQR(M)       | AFGP (6), FL-1H20 (24)        | b3*b5°b6°b12°b20*b23y6*y25                                    |
| 4422.1973          | 5.36 | 9.5539          | 4.4017 | 120   | 154 | (K)VTQTFGE<br>NMQKLQEHL<br>KPYAVDLQD<br>QINTQTQEM<br>K(L) | CROSSLINE (17),<br>MODIC (35) | b4b12*b23y4y4°y8y22°y24*                                      |
| 1397.7358          | 2.24 | -2.226          | 4.9547 | 199   | 209 | (K)GHLPRA<br>NELK(A)                                      | AMADORI (6)                   | b4°y5*y8y9*y11                                                |
| 1439.7673          | 1    | -3.2707         | 5.1152 | 256   | 265 | (K)VSAKIDQL<br>QK(N)                                      | CROSSLINE (4),<br>CML (10)    | b2°b4b4°b7b8b9°b10b10°y8y8°                                   |
| 1605.8367          | 2    | 2.1314          | 4.6307 | 248   | 259 | (K)NAEELQTK<br>VSAK(I)                                    | CROSSLINE (8),<br>MODIC (12)  | b2b3b6b8*b8°b11°y2y11y12                                      |
| 1645.7948          | 2.9  | 8.7684          | 4.516  | 248   | 259 | (K)NAEELQTK<br>VSAK(I)                                    | AFGP (8), CML (12)            | b8°b10*b11*y8y9y11*y12                                        |
| 1667.8313          | 2    | 7.1157          | 4.7251 | 199   | 209 | (K)GHLPRA<br>NELK(A)                                      | AMADORI (6),<br>AFGP (11)     | b5°b7b9*b11y2y3y3°y4y5°y10y10*                                |
| 1682.7866          | 1    | -1.3587         | 4.9606 | 349   | 360 | (R)EKVNSFM<br>STLEK(K)                                    | AFGP (12)                     | b1b2°b5*b5°b9°b11°b12°y2°y3y4y9°y10y10*y10°y11°y12*           |

**DIAB**

| Precursor MH+ (Da) | z | MH+ Error (ppm) | Score  | Start | End | Sequence             | Modifications         | BY Matches                            |
|--------------------|---|-----------------|--------|-------|-----|----------------------|-----------------------|---------------------------------------|
| 1373.7065          | 2 | 0.6658          | 5.3637 | 317   | 326 | (K)ALVQQLEQFR<br>(Q) | IMIDAZOLONE<br>B (10) | b2b4b5*b7*b8*b10b10*y3y3*y4y4°y5y6*y9 |

| Precursor MH+ (Da) | z    | MH+ Error (ppm) | Score  | Start | End | Sequence                                             | Modifications                                | BY Matches                                                        |
|--------------------|------|-----------------|--------|-------|-----|------------------------------------------------------|----------------------------------------------|-------------------------------------------------------------------|
| 1621.7726          | 2    | -1.8446         | 4.636  | 188   | 198 | (K)DKFNRNMEELK(G)                                    | AMADORI (5), MODIC (11)                      | b5b5*b7b8b10*y6y7°y10°y11*                                        |
| 1713.8646          | 3    | 7.6039          | 4.5885 | 280   | 294 | (K)GNTEGLQKSL EDLNR(Q)                               | GH1 (15)                                     | b3b10b10°y5°                                                      |
| 1771.8582          | 2.52 | -8.0503         | 4.6081 | 280   | 294 | (K)GNTEGLQKSL EDLNR(Q)                               | MOLD (8), MOLD (15)                          | b4°b10°b11y2y3y9°y10y15                                           |
| 1986.0013          | 2    | 1.3568          | 4.5349 | 190   | 204 | (K)FNRNMEELK GHLTPR(A)                               | FL-1H20 (9)                                  | b4b6*b9*b12*y4y13y14°                                             |
| 2009.0272          | 3    | -7.3864         | 4.5854 | 278   | 294 | (K)VKGNTEGLQK SLEDLNR(Q)                             | PYRALINE (10)                                | b6*b11b11°b13°b14*b16y1                                           |
| 2052.9404          | 2.75 | -6.6214         | 4.8986 | 234   | 247 | (K)LNHQMEGLA FQMKK(N)                                | AFGP (13), PYRALINE (14)                     | b2b8°b10b11b12*b12°b13°y2y4y6*y8y10°y14                           |
| 2179.0088          | 2    | 2.0112          | 4.5781 | 105   | 119 | (K)ELEDLRDRM MPHANK(V)                               | MGH1 (8), AFGP (15)                          | b8b11°b14y4y11°y13*                                               |
| 2311.21            | 2    | -0.7334         | 5.1528 | 346   | 361 | (K)SLREKVNFSM STLEKK(G)                              | FL-2H2O (5), CROSSLINE (15), MODIC (16)      | b4°b6b10b12°y10y10°y11y13y13*                                     |
| 2558.3687          | 3    | 9.0227          | 4.6025 | 199   | 220 | (K)GHLTPRANEL KATIDQNLEDLR(R)                        | MGH1 (6)                                     | b4b8*b9°b11b13*y8*y10                                             |
| 2919.3987          | 2.57 | -7.4902         | 5.1773 | 305   | 326 | (R)RTVEPMGEM FNKALVQQLEQFR(Q)                        | FL-2H2O (12), IMIDAZOLONE B (22)             | b4b8b11°b13b19°b21y4*y4°y8*y9y13*y14y18*y20y21*y22                |
| 3005.4468          | 2.87 | -0.9473         | 4.9849 | 170   | 192 | (K)ENVDNLHTS MMPLATNLKDK FNR(N)                      | Oxidation M (10), CROSSLINE (20), MOLD (23)  | b4*b4°b7*b8°b13b14b16y3y8y9*y13*y14*y15y16°y19                    |
| 3110.5337          | 4    | 8.223           | 4.6598 | 164   | 189 | (R)MQTTIKENVD NLHTSMMLPLAT NLKDK(F)                  | Oxidation M (1), MOLD (24), CEL (26)         | b6*b16*b19°b19°b20b25*y3°y5°y9*y13*y21*y24                        |
| 3238.6074          | 3.03 | -1.8178         | 5.0975 | 234   | 259 | (K)LNHQMEGLA FQMKKNAEELQ TKVSAK(I)                   | FL-1H20 (14), MOLD (22), CEL (26)            | b3*b4b9*b10°b21b24b26y3y5y5°y7*y8y8°y9°y10*y13°y14*y17°y19y23°y26 |
| 3241.5918          | 3    | -2.6792         | 4.7225 | 234   | 259 | (K)LNHQMEGLA FQMKKNAEELQ TKVSAK(I)                   | Oxidation M (5), FL-1H20 (14), PYRALINE (22) | b5*b11b12b15°b17b23b23*b23°y3°y23°                                |
| 5129.5513          | 3.69 | 0.3977          | 5.2126 | 306   | 348 | (R)TVEPMGEMF NKALVQQLEQFR QQLGPNSGEVES HLSFLEKSLR(E) | FL-2H2O (11), MODIC (21), MODIC (40)         | b1b3b3°b6b10b11b13°b19y3y5°y22y22°y25°y33°y43                     |

**DIAB HYD**

| Precursor MH+ (Da) | z    | MH+ Error (ppm) | Score  | Start | End | Sequence                           | Modifications                           | BY Matches                                                    |
|--------------------|------|-----------------|--------|-------|-----|------------------------------------|-----------------------------------------|---------------------------------------------------------------|
| 1621.7675          | 2    | -3.3928         | 3.9969 | 188   | 198 | (K)DKFNRNM EELK(G)                 | MODIC (2), AMADORI (11)                 | b4*b6*b9*y6*y7°y9°y11                                         |
| 1621.7717          | 2    | 10.2344         | 4.9717 | 188   | 198 | (K)DKFNRNM EELK(G)                 | FL-2H2O (2), CEL (11)                   | b2°b3b3°b4°b7*b8y3y5y7*y7°y9*y10°y11                          |
| 1895.9137          | 2.73 | 0.8797          | 5.1212 | 247   | 259 | (K)KNAEELQTKVSAK(I)                | AFGP (1), PYRALINE (9), CEL (13)        | b3b4b8*b11°b12°y6y6°y10y12°                                   |
| 1939.9163          | 2    | -8.3803         | 5.044  | 105   | 119 | (K)ELEDLRDR MMPHANK(V)             | MOLD (8), MODIC (15)                    | b1b9°b10b13°y2*y4y5y6*y8y14                                   |
| 1947.9683          | 2    | -9.7291         | 4.8361 | 210   | 221 | (K)ATIDQNLE DLRR(S)                | CROSSLINE (11), CROSSLINE (12)          | b4b4°b5°b6°b7b7°b11y7y9                                       |
| 1987.0182          | 2    | 3.3841          | 4.6029 | 205   | 220 | (R)ANELKATIDQNLEDLR(R)             | FL-1H2O (5)                             | b3°b5b6b9*b11°b14*y4                                          |
| 2391.18            | 2    | -4.784          | 4.5707 | 188   | 204 | (K)DKFNRNM EELKGHLTPR(A)           | FL-1H2O (11), AMADORI (17)              | b2°b3°b4b6*b10°b12y6y7y10y10°y12*y16*                         |
| 2441.1682          | 3.26 | 4.7608          | 4.887  | 278   | 294 | (K)VKGNTEGL QKSLEDLNR(Q)           | AFGP (2), AFGP (17)                     | b5°b14°y7y8°y9y11°y16y17                                      |
| 2862.3809          | 2.62 | 5.6065          | 5.492  | 234   | 255 | (K)LNHQMEG LAFQMKKNA EELQTK(V)     | FL-1H2O (13), CEL (14), CML (22)        | b2b5b6b6*b9b17°b20b22y5y8y9°y10°y11*y12y16y17y22              |
| 3110.5198          | 3.84 | -10.439         | 4.8446 | 234   | 259 | (K)LNHQMEG LAFQMKKNA EELQTKVSAK(I) | Oxidation M (5), MOLD (22), CEL (26)    | b6°b10°b12b12*b16°b19b21°b21°y3y4y9*y15                       |
| 3238.609           | 3.04 | 2.8496          | 5.0437 | 234   | 259 | (K)LNHQMEG LAFQMKKNA EELQTKVSAK(I) | FL-1H2O (14), MOLD (22), CEL (26)       | b3b4b5b7°b8b13b16b16°b24*b26y7*y9°y11y11*y12*y12°y14°y15*y16° |
| 3698.84            | 4    | 9.0845          | 5.036  | 193   | 220 | (R)NMEELKGHLTPRANELKATIDQNLEDLR(R) | FL-2H2O (6), AMADORI (17), AMADORI (28) | b1b5°b16°b22b23°y6y13y15y18*y22*                              |

**DIAB AMG**

| Precursor MH+ (Da) | z    | MH+ Error (ppm) | Score  | Start | End | Sequence                                | Modifications                            | BY Matches                              |
|--------------------|------|-----------------|--------|-------|-----|-----------------------------------------|------------------------------------------|-----------------------------------------|
| 1621.7704          | 2    | -3.0372         | 5.4672 | 188   | 198 | (K)DKFNRNM EELK(G)                      | MODIC (2), AMADORI (11)                  | b3b4*b8*b10b11y1y2y5°y8°y9y11           |
| 1926.932           | 2    | -0.6753         | 4.2384 | 105   | 119 | (K)ELEDLRDR MMPHANK(V)                  | CEL (15)                                 | b3°b5°b11°b12b15*y3*y4*y6*              |
| 3385.832           | 3    | 6.8751          | 4.7848 | 248   | 277 | (K)NAEELQTK VSAKIDQLQK NLAPLVEDVQ SK(V) | MOLD (30)                                | b10°y5*y7y8y17                          |
| 1271.7             | 2    | 0.5468          | 5.0587 | 199   | 209 | (K)GHLPRA NELK(A)                       | MODIC (6)                                | b4y3y5*y7y9*                            |
| 1439.7668          | 1    | 0.8267          | 5.5109 | 256   | 265 | (K)VSAKIDQL QK(N)                       | CROSSLINE (4), CML (10)                  | b1b2b2°b4°b5b8b8°b9°b10b10°y8y8°        |
| 1600.7172          | 3    | 3.6776          | 5.368  | 247   | 255 | (K)KNAEELQTK(V)                         | AFGP (1), AFGP (9)                       | b2b3b6y3°y5y6y7*y8*                     |
| 1679.7719          | 2    | -3.49           | 4.6359 | 351   | 361 | (K)VNSFMSTL EKK(G)                      | AFGP (10), FL-2H2O (11)                  | b2b2*b3*b5°b7°b9b9*b10°y6°y10           |
| 1715.868           | 2.54 | -1.0678         | 5.1384 | 247   | 259 | (K)KNAEELQTK VSAK(I)                    | AFGP (9)                                 | b2*b4b6b8°b9*b11y2y6°y7y13              |
| 1749.8584          | 2.41 | -0.2799         | 5.0829 | 349   | 361 | (R)EKVNSFM STLEKK(G)                    | Oxidation M (7), FL-1H2O (12), MOLD (13) | b4b5*b11*b12b13y5°y7y8°y13y13*          |
| 1856.9261          | 2.68 | 1.3252          | 5.5324 | 100   | 112 | (K)EEIKKELED LRDR(M)                    | FL-2H2O (4), CML (5)                     | b7b11y8°y10y12                          |
| 1985.9983          | 2    | 6.3737          | 5.0227 | 349   | 361 | (R)EKVNSFM STLEKK(G)                    | FL-1H2O (2), CROSSLINE (12), MOLD (13)   | b3b3°b4°b7°b10°b11b13°y3y4°y12*y13y13*  |
| 2157.0642          | 2.53 | -4.7088         | 5.1902 | 346   | 361 | (K)SLREKVNS FMSTLEKK(G)                 | FL-1H2O (5), CML (15), CML (16)          | b1b2b4°b6°b8b8°y3°y6y7°y8y16            |
| 2245.154           | 2.6  | -0.7381         | 5.1604 | 248   | 265 | (K)NAEELQTK VSAKIDQLQK (N)              | CEL (8), CEL (12), CML (18)              | b3b4°b5°b6b12*b13*b18y2y3y3*y4*y5y5*y6* |

| P21614- Vitamin D binding protein |      |                 |        |       |     |                                         |                                                                                           |                                                 |
|-----------------------------------|------|-----------------|--------|-------|-----|-----------------------------------------|-------------------------------------------------------------------------------------------|-------------------------------------------------|
| CON                               |      |                 |        |       |     |                                         |                                                                                           |                                                 |
| Precursor MH+ (Da)                | z    | MH+ Error (ppm) | Score  | Start | End | Sequence                                | Modifications                                                                             | BY Matches                                      |
| 2382.0637                         | 2.09 | 2.7977          | 5.6819 | 374   | 393 | (R)ECCDTQDS<br>VACFSTQSPL<br>LK(R)      | Carbamidomethyl C (2),<br>Carbamidomethyl C (3),<br>Carbamidomethyl C (11), MODIC (20)    | b3b7b9b10b14°y<br>2y5*y13y14                    |
| 2950.3445                         | 2.3  | 8.1226          | 5.2011 | 181   | 203 | (K)NYLSMVG<br>SCCTSANTPTV<br>CFVKER(L)  | Carbamidomethyl C (9),<br>Carbamidomethyl C (10),<br>Carbamidomethyl C (18), AFGP (21)    | b3°b11b13b13°b<br>15b16b22y13°y1<br>5y15*y25*   |
| 1552.7366                         | 2.22 | 4.6103          | 5.8524 | 26    | 37  | (K)DKVCNELA<br>MLGK(E)                  | FL-2H2O (2),<br>Carbamidomethyl C (4), MOLD (12)                                          | b1b1°b2b3b6b7*<br>b9*b12b14b14*y<br>9y13*y15    |
| 1825.7762                         | 2    | 0.1304          | 6.0633 | 440   | 451 | (K)DMVEKHS<br>DFASK(C)                  | AFGP (5),<br>AMADORI (12)                                                                 | b2b3°b4°b9°b19*<br>y20                          |
| 2011.9784                         | 3.11 | -3.7392         | 5.5728 | 51    | 65  | (R)KFSSTFE<br>QVNQLVK(E)                | FL-2H2O (1), FL-<br>1H2O (15)                                                             | b3°b12b12°b13b<br>14b17*b20b21y8                |
| 2777.269                          | 2    | 7.6547          | 5.6414 | 333   | 353 | (K)DLCGQSTT<br>QAMDQYTFE<br>LSRR(T)     | Carbamidomethyl C (3), AFGP (20)                                                          | b16b17y3°y6y8y<br>12y13°y14°y21°                |
| 2986.2969                         | 2.41 | -6.0404         | 5.8028 | 95    | 119 | (K)SCESDAPF<br>PVHPGTPECC<br>TKEGLER(K) | Carbamidomethyl C (2),<br>Carbamidomethyl C (17),<br>Carbamidomethyl C (18), FL-2H2O (20) | b2b8b10*b11y4y<br>11*y12*                       |
| DIAB                              |      |                 |        |       |     |                                         |                                                                                           |                                                 |
| Precursor MH+ (Da)                | z    | MH+ Error (ppm) | Score  | Start | End | Sequence                                | Modifications                                                                             | BY Matches                                      |
| 1807.8413                         | 2    | -1.0707         | 5.0553 | 28    | 41  | (K)VCNELAMLGK<br>EDFR(S)                | Carbamidomethyl C (2), FL-2H2O (10)                                                       | b1b3*b5*b5°b12<br>*b14°y2y7y8                   |
| 1945.9161                         | 3    | 4.3807          | 5.5989 | 430   | 444 | (K)TPNTSPAELKD<br>MVEK(H)               | Oxidation M (12),<br>AFGP (15)                                                            | b1b3*b4b4°b6b7<br>*b8*b10*b14*y5<br>°y10y10°y14 |
| 2509.17                           | 3    | -1.0551         | 5.7319 | 22    | 41  | (R)DYEKDKVCNEL<br>AMLGKEDFR(S)          | Carbamidomethyl C (8), MOLD (16)                                                          | b4b10°b12b13y2<br>0                             |



| Precursor MH+ (Da) | z    | MH+ Error (ppm) | Score  | Start | End | Sequence                                  | Modifications                                                                    | BY Matches                                                       |
|--------------------|------|-----------------|--------|-------|-----|-------------------------------------------|----------------------------------------------------------------------------------|------------------------------------------------------------------|
| 3068.3518          | 3    | -0.6536         | 5.4731 | 395   | 419 | (R)QLTSFIEKGQE<br>MCADYSENTFTEY<br>K(K)   | MOLD (8),<br>Carbamidomethyl<br>C (13)                                           | b2b2*b3*b5*b10<br>*b11*b19*b23*y<br>4y7°y8*y11y15y1<br>7y19*y20* |
| 2204.9773          | 3.31 | 4.7429          | 5.8265 | 219   | 232 | (R)VCSQYAAYGKE<br>KSR(L)                  | Carbamidomethyl<br>C (2), AFGP (10),<br>FL-2H2O (12),<br>AMADORI (14)            | b1b2b4*b5*b6b1<br>2°b13°b14b14°y1<br>y6y7y7°y11*y14              |
| 2281.0742          | 3    | 10.4103         | 6.0506 | 22    | 37  | (R)DYEKDKVCNEL<br>AMLGK(E)                | CROSSLINE (4),<br>CML (6),<br>Carbamidomethyl<br>C (8), CML (16)                 | b1b2b4b11b12b<br>16*y11y12y12*y<br>12°y15y16                     |
| 2429.1555          | 2.67 | -2.4811         | 5.6904 | 26    | 41  | (K)DKVCNELAML<br>GKEDFR(S)                | CROSSLINE (2),<br>Carbamidomethyl<br>C (4), CROSSLINE<br>(12)                    | b10°b15°b16°y3y<br>5°y6y13°y16                                   |
| 2490.318           | 3    | 0.6971          | 5.8578 | 243   | 264 | (K)VPTANLENVLP<br>LAEDFTEILSR(C)          | MOLD (22)                                                                        | b5b6°b7°b8°b10*<br>b11b13b17*b19°<br>b22y9°y11y18°y1<br>9°y22    |
| 2546.1836          | 3.87 | -1.2231         | 5.6618 | 430   | 451 | (K)TPNTSPAELKD<br>MVEKHSDFASK(C<br>)      | Oxidation M (12),<br>MOLD (15), MOLD<br>(22)                                     | b1b5*b8b8°b9°b<br>11*b12b12°b21°<br>y9y17y22y22*                 |
| 2612.2087          | 3    | -9.0268         | 5.6365 | 20    | 37  | (R)GRDYEKDKVC<br>NELAMLGK(E)              | CROSSLINE (6), CEL<br>(8),<br>Carbamidomethyl<br>C (10), AMADORI<br>(18)         | b7°b8b11*b17y4<br>y5y9y11y14                                     |
| 2742.2688          | 3    | 2.0657          | 5.7249 | 430   | 451 | (K)TPNTSPAELKD<br>MVEKHSDFASK(C<br>)      | FL-1H2O (10),<br>PYRALINE (15),<br>CML (22)                                      | b7b9b10b10*b11<br>*b12°b14b14°b1<br>6°y6y8°y9y17°                |
| 3238.6147          | 3.04 | -2.2324         | 5.6913 | 28    | 51  | (K)VCNELAMLGK<br>EDFRSLILYSRK(<br>F)      | Carbamidomethyl<br>C (2), FL-2H2O (10),<br>AMADORI (23),<br>PYRALINE (24)        | b5*b18b19b24y1<br>y4°y5y5°y8y15°y<br>23°                         |
| 3515.736           | 3.58 | 2.429           | 6.1177 | 26    | 50  | (K)DKVCNELAML<br>GKEDFRSLILYSR<br>(K)     | FL-1H2O (2),<br>Carbamidomethyl<br>C (4), CROSSLINE<br>(16), AMADORI<br>(25)     | b10*b11b12b13b<br>15°b17b17*b18b<br>19b20b23b25y2y<br>13y17°     |
| 3941.8296          | 3    | 2.0413          | 5.8992 | 395   | 421 | (R)QLTSFIEKGQE<br>MCADYSENTFTEY<br>KKK(L) | Carbamidomethyl<br>C (13), CROSSLINE<br>(25), CROSSLINE<br>(26), AMADORI<br>(27) | b6°b12b13b13°b<br>15b23*b24b24*y<br>20*                          |

| Precursor MH+ (Da) | z    | MH+ Error (ppm) | Score  | Start | End | Sequence                                              | Modifications                                                                         | BY Matches                                                            |
|--------------------|------|-----------------|--------|-------|-----|-------------------------------------------------------|---------------------------------------------------------------------------------------|-----------------------------------------------------------------------|
| 4299.97            | 4    | -1.1586         | 6.0533 | 115   | 149 | (K)EGLERKLCMAA<br>LSHQPFQFPTYVE<br>PTNDEICEAFR(R)     | MOLD (5), MODIC (6),<br>Carbamidomethyl C (8),<br>Carbamidomethyl C (31), MOLD (35)   | b3°b9°b11b15°b22°b23°b25b25°<br>y2y6y11°y14°y17<br>y18°y20y20°y24y33° |
| <b>DIAB HYD</b>    |      |                 |        |       |     |                                                       |                                                                                       |                                                                       |
| Precursor MH+ (Da) | z    | MH+ Error (ppm) | Score  | Start | End | Sequence                                              | Modifications                                                                         | BY Matches                                                            |
| 1629.8041          | 3    | 4.6514          | 5.5562 | 26    | 37  | (K)DKVCNELA<br>MLGK(E)                                | CROSSLINE (2),<br>Carbamidomethyl C (4)                                               | b3b9°b10b10°b11°<br>y3°y4y4°y9                                        |
| 4261.9814          | 4.39 | -10.1713        | 6.845  | 509   | 543 | (R)RPCFSALT<br>VDETYVPKEF<br>KAETFTFHSDI<br>CTLPEK(E) | Carbamidomethyl C (3), MOLD (16),<br>Carbamidomethyl C (30), MOLD (35)                | b2b9b10b12°b15<br>b20y3y3°y5y6°y8<br>y9°y11y12y19°y33°                |
| 1491.8207          | 2.13 | -3.3577         | 6.3479 | 361   | 372 | (R)RHPDYSVS<br>LLLR(L)                                | MODIC (12)                                                                            | b1b4b5°b9°b11°<br>b12b14°y8y10y14                                     |
| 1717.833           | 3    | 6.6514          | 5.7472 | 28    | 41  | (K)VCNELAM<br>LGKEDFR(S)                              | Carbamidomethyl C (2), MODIC (10)                                                     | b7°b21b21°b22°<br>b24°y6                                              |
| 1781.7675          | 2    | 1.6929          | 5.9737 | 219   | 230 | (R)VCSQYAAY<br>GKEK(S)                                | Carbamidomethyl C (2), AFGP (10),<br>PYRALINE (12)                                    | b5b6b9y5y9                                                            |
| 1946.8894          | 2    | -9.7811         | 5.7183 | 222   | 236 | (R)MKCSSMQ<br>KFGERAFK(A)                             | Carbamidomethyl C (3), CEL (8), GH1 (12)                                              | b3b3°b5°b6b7b9<br>b13b14°b21°b31°<br>*b34b36°y2y2°y3°<br>y11y14°y22   |
| 1947.9678          | 2    | -1.019          | 5.579  | 430   | 444 | (K)TPNTSPAEL<br>KDMVEK(H)                             | CROSSLINE (10),<br>MODIC (15)                                                         | b4°b5b7b8b14°y4y6                                                     |
| 1965.9017          | 2    | -0.4196         | 6.8898 | 220   | 233 | (R)QRMKCSS<br>MQKFGER(A)                              | Carbamidomethyl C (5), FL-1H20 (10), MOLD (14)                                        | b1°b3b4b4°b5b6<br>b6°b6°y3y5°y10                                      |
| 2139.9175          | 2    | 7.3882          | 6.1625 | 265   | 281 | (K)VNKECCH<br>GDLLECADDR<br>(A)                       | Carbamidomethyl C (5),<br>Carbamidomethyl C (6),<br>Carbamidomethyl C (13), MOLD (17) | b1°b2b7b12b12°<br>b13°b15°b19°y8<br>y9y10°y16°y19°y20                 |
| 2294.0288          | 2    | 8.182           | 6.5935 | 570   | 588 | (K)TVMDDFA<br>QFLDTCKAA<br>DK(D)                      | Carbamidomethyl C (13),<br>Carbamidomethyl C (14), CML (19)                           | b18y10°y13y22°                                                        |

| Precursor MH+ (Da) | z    | MH+ Error (ppm) | Score  | Start | End | Sequence                    | Modifications                              | BY Matches                            |
|--------------------|------|-----------------|--------|-------|-----|-----------------------------|--------------------------------------------|---------------------------------------|
| 2324.1873          | 2.7  | 2.9061          | 6.9363 | 422   | 438 | (K)LGEYGFQN AILVRYTQK(A)    | AMADORI (13), AMADORI (17)                 | b2°b3*b5*b7b7* b8b10b14°b15y3 y4°y13° |
| 2326.1348          | 2    | -0.9414         | 6.5016 | 342   | 360 | (K)NYAEAKD VFLGTFLYEYS R(R) | GH1 (19)                                   | b2b9b10b11b16* b17*y1y17y19y3 1       |
| 2375.3308          | 2.78 | 4.6632          | 6.6056 | 544   | 558 | (K)EKQIKKQT ALAELVK(H)      | FL-1H2O (2), CROSSLINE (5), CROSSLINE (15) | b1b1°b5b10b11* y4y10y10*y10°y1 1*y12  |

### DIAB AMG

| Precursor MH+ (Da) | z    | MH+ Error (ppm) | Score  | Start | End | Sequence                       | Modifications                                                                   | BY Matches                                 |
|--------------------|------|-----------------|--------|-------|-----|--------------------------------|---------------------------------------------------------------------------------|--------------------------------------------|
| 1448.7513          | 2.25 | 2.3699          | 5.8655 | 428   | 439 | (R)TKTPNTSPAELK(D)             | AMADORI (12)                                                                    | b1b1°b2b5*b11* b12°y4y6y10°y11 °y14°       |
| 2333.1892          | 3    | -1.6407         | 5.5674 | 426   | 444 | (R)LRTKTPNTSPAEL KDMVEK(H)     | MOLD (2), FL-2H2O (4)                                                           | b13b14y8y10°y1 1°y14y18                    |
| 2602.0913          | 2    | -3.6888         | 5.2143 | 66    | 87  | (K)EVVSLTEECAEG ADPTCYDTR(T)   | Carbamidomethyl C (9), Carbamidomethyl C (10), Carbamidomethyl C (18), GH1 (22) | b3°b15b23b28y1 3°y16y20°y21y24             |
| 2841.351           | 3    | -3.5389         | 5.7136 | 428   | 451 | (R)TKTPNTSPAELKD MVEKHSDFAK(C) | PYRALINE (12), CEL (17)                                                         | b3b11b12*y9*y1 2                           |
| 1129.5579          | 2    | -6.0953         | 5.5915 | 430   | 439 | (K)TPNTSPAELK(D)               | CEL (10)                                                                        | b13°y3y4°y7y9y1 0y13y14                    |
| 1488.6841          | 2    | -2.828          | 5.6487 | 219   | 230 | (R)VCSQYAAYGKEK (S)            | Carbamidomethyl C (2), MODIC (10), MOLD (12)                                    | b10b12b16b21y2 y10°y13°y18*y23             |
| 2159.057           | 2    | -4.5517         | 5.7951 | 428   | 444 | (R)TKTPNTSPAELKD MVEK(H)       | PYRALINE (2), AMADORI (17)                                                      | b2b3°b10b14y3y 8°y9y9°y10°y11°y 12*y18*y20 |
| 2165.0027          | 2.86 | -9.9986         | 5.8414 | 22    | 37  | (R)DYEKDKVCNELA MLGK(E)        | Carbamidomethyl C (8), CROSSLINE (16)                                           | b1°b2b4°b6b11° b14b16b21b21°y 3            |
| 2186.9526          | 4    | 4.1829          | 5.7206 | 219   | 232 | (R)VCSQYAAYGKEK SR(L)          | Carbamidomethyl C (2), AFGP (12), AFGP (14)                                     | b2b3°b4b8*b12° y11*y12                     |
| 2262.0024          | 3.34 | -6.7993         | 5.9554 | 26    | 41  | (K)DKVCNELAMLGK EDFR(S)        | FL-2H2O (2), Carbamidomethyl C (4), MOLD (12), AMADORI (16)                     | b6b10°b21y15*y 17y24y30°y41°y4 6*          |

| Precursor MH+ (Da) | z   | MH+ Error (ppm) | Score  | Start | End | Sequence                   | Modifications                                                                          | BY Matches              |
|--------------------|-----|-----------------|--------|-------|-----|----------------------------|----------------------------------------------------------------------------------------|-------------------------|
| 2382.065           | 2.1 | 0.2931          | 5.5127 | 374   | 393 | (R)ECCDTQDSVACFSTQSPLLK(R) | Carbamidomethyl C (2),<br>Carbamidomethyl C (3),<br>Carbamidomethyl C (11), MODIC (20) | b3b10b14y2y3°y6y11°y14° |
| 2453.0298          | 2   | -0.505          | 5.7388 | 403   | 420 | (K)GQEMCADYSENTFTEYKK(K)   | Carbamidomethyl C (5), FL-1H20 (17), PYRALINE (18)                                     | b2b4*b6°b8°b10b16y5     |

**Q91X72-Hemopexin****CON**

| Precursor MH+ (Da) | z    | MH+ Error (ppm) | Score  | Start | End | Sequence                          | Modifications                                         | BY Matches                        |
|--------------------|------|-----------------|--------|-------|-----|-----------------------------------|-------------------------------------------------------|-----------------------------------|
| 1458.6973          | 2    | -1.3471         | 5.9172 | 180   | 192 | (R)SWSTVGNCTAALR(W)               | Carbamidomethyl C (8), MODIC (13)                     | b1°b3°b9b10°y4y6y7°y12°y13        |
| 1796.8245          | 2    | -6.8706         | 5.7067 | 178   | 192 | (K)ERSWSTVGNCTAALR(W)             | MOLD (2), Carbamidomethyl C (10), GH1 (15)            | b3b4b5b7°b10b11b12y7°             |
| 1898.9692          | 3    | 2.3501          | 5.5812 | 205   | 218 | (K)FLRFNPVTGEVPPR(Y)              | AFGP (14)                                             | b7°b9°y4y5°y11°y13°y14            |
| 2165.004           | 2.83 | 1.1256          | 5.6103 | 270   | 287 | (R)GATYAFTGSHYWRDSSR(D)           | MODIC (13), MGH1 (18)                                 | b7b7°b11°b13°y3°y5y13°y17°y18     |
| 3664.698           | 3    | -1.4283         | 5.9156 | 124   | 150 | (K)ENGYPKLFQEEFPGIPYPPDAAVECHR(G) | CROSSLINE (6), Carbamidomethyl C (25), CROSSLINE (27) | b4°b11°*b16b20b24°y15             |
| 3700.6406          | 3    | 2.5309          | 5.5009 | 124   | 150 | (K)ENGYPKLFQEEFPGIPYPPDAAVECHR(G) | AFGP (6), Carbamidomethyl C (25), AFGP (27)           | b3°b4b8°b9°b11°*b13°b14b16y6°y11° |
| 2742.2449          | 3    | 2.0443          | 5.6874 | 130   | 150 | (K)LFQEEFPGIPYPPDAAVECHR(G)       | Carbamidomethyl C (19), AFGP (21)                     | b4b4°b11°b13°b21°y5y8°y11y17y19   |

**DIAB**

| Precursor MH+ (Da) | z    | MH+ Error (ppm) | Score  | Start | End | Sequence                             | Modifications                                                | BY Matches                             |
|--------------------|------|-----------------|--------|-------|-----|--------------------------------------|--------------------------------------------------------------|----------------------------------------|
| 1773.9154          | 3    | -5.1021         | 5.8736 | 331   | 345 | (K)GGNNLVSGYPKRLEK(E)                | IMIDAZOLONEB (12)                                            | b3b5b9y2y4°y6°y8                       |
| 3836.9255          | 4    | 1.8809          | 6.1527 | 92    | 122 | (K)NPITSVDAAFRGPDVFLIKEDKVWVYPPEK(K) | AFGP (20), MOLD (23)                                         | b1b3°b4°b5°b6°b8°b26°y3y4°y6y7°y26     |
| 1420.7775          | 2.41 | -1.5253         | 6.0123 | 440   | 451 | (K)LNAAKSLPQPQK(V)                   | FL-2H2O (12)                                                 | b2b4b6°b7b7°y12                        |
| 1883.9084          | 3    | 1.3181          | 6.0198 | 166   | 177 | (R)KWFWDFASTRQK(E)                   | AFGP (1)                                                     | b1b2b5b7b8°b11°*y4y8y12                |
| 1963.9401          | 3    | 3.0335          | 6.2766 | 167   | 179 | (K)WFWDFATRQKER(S)                   | MOLD (8), FL-1H2O (11)                                       | b2b3b4b6b10b10°b10°b12°y4°y7y9°y11°*   |
| 1991.878           | 2.73 | -2.0969         | 6.3124 | 225   | 239 | (R)DYFVSCPGRGHGRPR(N)                | Carbamidomethyl C (6), MOLD (9), GH1 (13), IMIDAZOLONEB (15) | b2°b3b5°b11°b13b13°b14°b15y8y12°y13y15 |
| 2245.1658          | 2.49 | -7.1693         | 6.1043 | 92    | 111 | (K)NPITSVDAAFRGPDVFLIK(E)            | MOLD (11), MOLD (20)                                         | b3b4°b6b16y8°y13y19°                   |

| Precursor MH+ (Da) | z    | MH+ Error (ppm) | Score  | Start | End | Sequence                                          | Modifications                                                                | BY Matches                                                                    |
|--------------------|------|-----------------|--------|-------|-----|---------------------------------------------------|------------------------------------------------------------------------------|-------------------------------------------------------------------------------|
| 2368.149           | 2.19 | -3.0287         | 6.0532 | 72    | 89  | (K)GEFVWRGHS<br>GTRELISAR(W)                      | AFGP (6), GH1 (12)                                                           | b5b8b12b14y9y16y17°y18                                                        |
| 2453.2014          | 2    | -0.0656         | 6.1443 | 112   | 129 | (K)EDKVWVYPPE<br>KKENGYPK(L)                      | FL-2H2O (3),<br>MOLD (11), CEL (18)                                          | b1b2b2°b3b3°b5b6°b8°b10b15°b16°b17*y3y18                                      |
| 2742.257           | 3    | -0.042          | 6.0231 | 130   | 150 | (K)LFQEEFPGIPY<br>PPDAAVECHR(G)                   | Carbamidomethyl C (19), AFGP (21)                                            | b4*b5b8b8°b10b12°b13*b18°y10y12y12°y13°y15                                    |
| 3514.651           | 4    | -0.5984         | 6.1403 | 346   | 376 | (K)ELGSPPGISLE<br>TIDAAFSCPGSSR<br>LYVSSGR(R)     | Carbamidomethyl C (19),<br>IMIDAZOLONEB (24), AMADORI (31)                   | b1°b5°b8°b10°b12b25°y3y5°y9°y14y18y23                                         |
| 3665.819           | 3.73 | -0.5246         | 6.6848 | 343   | 376 | (R)LEKELGSPPGI<br>SLETIDAAFSCPG<br>SSRLYVSSGR(R)  | Carbamidomethyl C (22), MODIC (27), MOLD (34)                                | b2°b3b4b5b7°b14°b21b23b24°b27b29b34b34°y5°y7y10y14y15°y17y18°y21y24°y26y31y34 |
| 3816.8882          | 3    | -2.7438         | 6.0345 | 342   | 376 | (K)RLEKELGSPPG<br>ISLETIDAAFSCPG<br>SSRLYVSSGR(R) | Carbamidomethyl C (23), GH1 (28), GH1 (35)                                   | b3°b5b6b6°y3°y4y4°y10y20y26y26°                                               |
| 4248.9077          | 3.11 | 1.8475          | 6.0468 | 255   | 287 | (R)CSPDPGLTALL<br>SDHRGATYAFTG<br>SHYWRLDSSR(D)   | Carbamidomethyl C (1), AFGP (15),<br>IMIDAZOLONEB (28),<br>IMIDAZOLONEB (33) | b2b2°b12°b15b16°b17°b25b26y2y2°y10y12y20y20°y33                               |
| 4317.153           | 3    | 0.4851          | 6.1175 | 370   | 400 | (R)LYVSSGRRLW<br>WLDLKSGAQAT<br>WTEVSWPHEK(V)     | CROSSLINE (7),<br>CROSSLINE (8),<br>FL-2H2O (31)                             | b6°b13°b15y3y3°y6y11y12°y15*y18y19*y21y30*                                    |

#### DIAB HYD

| Precursor MH+ (Da) | z | MH+ Error (ppm) | Score  | Start | End | Sequence                     | Modifications                       | BY Matches                       |
|--------------------|---|-----------------|--------|-------|-----|------------------------------|-------------------------------------|----------------------------------|
| 1793.8738          | 2 | -0.6466         | 6.3755 | 166   | 177 | (R)KWFWDFA<br>TRTQK(E)       | PYRALINE (1), CEL (12)              | b2b9b10°b11y3y5*y7°y8*y10°y12*   |
| 2114.041           | 2 | -4.5657         | 5.5993 | 175   | 192 | (R)TQKERSWS<br>TVGNCTAALR(W) | MOLD (5),<br>Carbamidomethyl C (13) | b3*b3°b10b10°b17b17*y7y9y15*y17* |
| 2133.0615          | 2 | -1.4074         | 6.0576 | 166   | 179 | (R)KWFWDFA<br>TRTQKER(S)     | CEL (1), AMADORI (9)                | b1b6b10b11y5°y10°                |

| Precursor MH+ (Da) | z    | MH+ Error (ppm) | Score  | Start | End | Sequence                                      | Modifications                                     | BY Matches                              |
|--------------------|------|-----------------|--------|-------|-----|-----------------------------------------------|---------------------------------------------------|-----------------------------------------|
| 2159.0562          | 2.05 | 0.1099          | 6.4378 | 175   | 192 | (R)TQKERSWS TVGNCTAALR(W)                     | GH1 (5), Carbamidomethyl C (13), MGH1 (18)        | b2*b2°b5b6b7b10*b12°y9y14y15*y17°       |
| 2173.0378          | 2.06 | 10.4917         | 6.0456 | 270   | 287 | (R)GATYAFTGS HYWRLDSSR(D)                     | MOLD (13), MOLD (18)                              | b4b4°b5°b6°b9°b13b18y2y5°y7°y10y15y18   |
| 2218.0515          | 2.91 | 1.6563          | 6.1346 | 166   | 179 | (R)KFWDFFA TRTQKER(S)                         | MOLD (9), AFGP (12)                               | b1b3b4b8°b9b9°b10°b11y5*y6*y11*y14      |
| 2919.4045          | 2.62 | -0.2607         | 6.3955 | 175   | 196 | (R)TQKERSWS TVGNCTAALR WLER(Y)                | PYRALINE (3), AMADORI (5), Carbamidomethyl C (13) | b1b2°b4b7b8*b10b11b12°b19*y5y7y8y14*y22 |
| 3515.7307          | 3.6  | -5.3796         | 6.3274 | 205   | 233 | (K)FLRFNPVTG EVPPRYPLDAR DYFVSCPGR(G)         | MODIC (3), MGH1 (20), Carbamidomethyl C (26)      | b2b8*b11°b17*b21b23y7°y8y11y12y18y24    |
| 3516.7021          | 3.83 | 2.274           | 6.0451 | 346   | 376 | (K)ELGSPPGISL ETIDAAFSCPG SSRLVSSGR(R)        | Carbamidomethyl C (19), CROSSLINE (24), MGH1 (31) | b6b8b13°b18b22°y2y4y7y9°y20y21          |
| 4366.956           | 3    | -8.5979         | 6.0596 | 219   | 254 | (R)YPLDARDYF VSCPGRGHGR PRNGTAHGNS THPMHSR(C) | Carbamidomethyl C (12), AFGP (21), MODIC (36)     | b1b3b11°b12b12°b19b20°b22*y5y7y11y13    |

### DIAB AMG

| Precursor MH+ (Da) | z    | MH+ Error (ppm) | Score  | Start | End | Sequence                                               | Modifications                                                   | BY Matches                             |
|--------------------|------|-----------------|--------|-------|-----|--------------------------------------------------------|-----------------------------------------------------------------|----------------------------------------|
| 2052.9453          | 2.74 | 0.3321          | 5.6163 | 225   | 239 | (R)DYFVSCPGR GHGRPR(N)                                 | Carbamidomethyl C (6), CROSSLINE (13), GH1 (15)                 | b1b2°b3b5b5°b11°b15y2y4y7              |
| 5636.4565          | 3.68 | -3.5648         | 6.2454 | 33    | 77  | (R)VAEVENGTPKPSDVPEHCL DTWSFDAAT MDHNGTMLF FKGEFVWR(G) | FL-1H20 (9), Carbamidomethyl C (18), FL-1H20 (39), AMADORI (45) | b2b9°b14b19b19°b20b24*b26*y8°y9°y10y14 |
| 1230.6             | 2    | -5.0293         | 5.239  | 92    | 102 | (K)NPITSVDAAFR(G)                                      | GH1 (11)                                                        | b3*b4*b5°b6°b7*y5y6y7°y11              |
| 1438.7922          | 2    | 1.5956          | 5.4117 | 440   | 451 | (K)LNAAKSLPQPQK(V)                                     | FL-1H20 (12)                                                    | b3b4y4y7*y9                            |
| 1901.9095          | 3    | 1.408           | 5.6446 | 166   | 177 | (R)KFWDFFA TRTQK(E)                                    | FL-1H20 (1), FL-1H20 (12)                                       | b4b9b10y5*y6y8*y9°                     |

| Precursor MH+ (Da) | z    | MH+ Error (ppm) | Score  | Start | End | Sequence                              | Modifications                                                   | BY Matches                                           |
|--------------------|------|-----------------|--------|-------|-----|---------------------------------------|-----------------------------------------------------------------|------------------------------------------------------|
| 2115.004           | 2    | 4.5684          | 5.6933 | 270   | 287 | (R)GATYAFTGS<br>HYWRLDSSR(D)          | GH1 (18)                                                        | b5b14b15°b17°y3°<br>y6y10°y12y15                     |
| 2313.0754          | 2.76 | -1.5007         | 5.9116 | 234   | 254 | (R)GHGRPRNG<br>TAHGNSTHPM<br>HSR(C)   | MOLD (4)                                                        | b11b14b17y3y3°y<br>4y12*y15y15*y18<br>y21            |
| 2367.1306          | 2.24 | 0.257           | 5.7742 | 234   | 254 | (R)GHGRPRNG<br>TAHGNSTHPM<br>HSR(C)   | MOLD (4), MGH1<br>(21)                                          | b13b16°b18°y7y1<br>0y10°y11y13*y16°<br>y17y18*y21    |
| 2422.0967          | 3    | 1.6634          | 5.5661 | 234   | 254 | (R)GHGRPRNG<br>TAHGNSTHPM<br>HSR(C)   | IMIDAZOLONEB<br>(6), Oxidation M<br>(18)                        | b5b12b14°b15*b1<br>8°b19*b20b20*y6<br>y11y13°y14°y17 |
| 2430.126           | 3    | -6.0668         | 5.6313 | 178   | 196 | (K)ERSWSTVG<br>NCTAALRWLE<br>R(Y)     | MOLD (2),<br>Carbamidomethy<br>l C (10), MOLD<br>(15), GH1 (19) | b3b4b4°b8b8°b15<br>y10y15                            |
| 2823.3943          | 3    | 0.273           | 5.6193 | 92    | 114 | (K)NPITSVDAA<br>FRGPDSVFLIKE<br>DK(V) | IMIDAZOLONEB<br>(11), AMADORI<br>(23)                           | b2b5°b8b8°b19*y<br>2°y3°y7y8°y11y20                  |



**Q61646- Haptoglobin****CON**

| Precursor MH+ (Da) | z    | MH+ Error (ppm) | Score  | Start | End | Sequence                           | Modifications                                                         | BY Matches                              |
|--------------------|------|-----------------|--------|-------|-----|------------------------------------|-----------------------------------------------------------------------|-----------------------------------------|
| 1806.9122          | 2    | 7.1349          | 5.4205 | 212   | 227 | (K)DYIAPGRVG<br>YVSGWGR(N)         | MGH1 (7)                                                              | b1b3b3°b4b7y4                           |
| 2013.931           | 2.77 | -4.3228         | 5.6702 | 250   | 263 | (K)CVVHYENS<br>TVPEKK(N)           | Carbamidomethyl C (1), AMADORI (13), AMADORI (14)                     | b1b4b10b12°b13b13°y3°y7y14*             |
| 1825.9347          | 2.48 | 7.7932          | 5.4905 | 237   | 249 | (R)LKYVMLPV<br>ADQDK(C)            | AFGP (2), MODIC (13)                                                  | b2b11°b13°y4°y8°y9y10°y13               |
| 1828.8971          | 2.57 | -4.1312         | 6.2156 | 212   | 227 | (K)DYIAPGRVG<br>YVSGWGR(N)         | MODIC (7), GH1 (16)                                                   | b2b4°b7°b8b12°b15b16y4y5y5°y7y7°y11y16  |
| 2289.1904          | 3.27 | -7.4907         | 6.0372 | 124   | 143 | (R)HGLTTGATL<br>ISDQWLLTTAK(N)     | AMADORI (20)                                                          | b3b5b6b17°b18b20y2y5y9y12               |
| 2441.1797          | 3.52 | -3.448          | 5.8495 | 83    | 102 | (K)LPECEAVCG<br>KPKHPVDQVQ<br>R(I) | Carbamidomethyl C (4),<br>Carbamidomethyl C (8), MODIC (10), CML (12) | b2b11b13°b17b18b18°b19°b20y2°y13°y18y20 |

**DIAB**

| Precursor MH+ (Da) | z    | MH+ Error (ppm) | Score  | Start | End | Sequence                                        | Modifications                                                            | BY Matches                                               |
|--------------------|------|-----------------|--------|-------|-----|-------------------------------------------------|--------------------------------------------------------------------------|----------------------------------------------------------|
| 1864.9344          | 3    | -1.8575         | 5.8652 | 103   | 119 | (R)IIGGSMDAK<br>GSFPWQAK(M)                     | CEL (17)                                                                 | b6°b7b8b14b15°y7°y10°y12y13y16                           |
| 3458.6965          | 3.62 | -4.5373         | 6.1463 | 54    | 82  | (R)QFYRLRAE<br>GDGVYTLNDE<br>KQWVNTVAG<br>EK(L) | MODIC (4),<br>MODIC (19)                                                 | b8°b10b15b21b23y19°y20°y23°                              |
| 1032.5217          | 2    | 3.6702          | 6.0733 | 95    | 102 | (K)HPVDQVQR<br>(I)                              | MGH1 (8)                                                                 | b4b4°b5°b7°y3y7°                                         |
| 1446.7777          | 3    | -3.4768         | 6.0639 | 157   | 168 | (K)DITPTLTLYV<br>GK(N)                          | FL-2H2O (12)                                                             | b4b8b9°y4y6°y10                                          |
| 1489.7546          | 2    | -1.0419         | 6.5221 | 228   | 238 | (R)NANFRFTD<br>RLK(Y)                           | MGH1 (5), MGH1 (9)                                                       | b2°b3b5b6b9b10y4°y8y10                                   |
| 2495.1868          | 2.11 | -9.2112         | 6.1419 | 83    | 102 | (K)LPECEAVCG<br>KPKHPVDQVQ<br>R(I)              | Carbamidomethyl C (4),<br>Carbamidomethyl C (8), PYRALINE (12), GH1 (20) | b4°b11b13b13°b15°b17°y3y4y6°y7y8°y9y9°y10°y15°y16y18°y20 |
| 2548.2588          | 3    | -7.9189         | 5.9392 | 103   | 123 | (R)IIGGSMDAK<br>GSFPWQAKMI<br>SR(H)             | Oxidation M (18),<br>CROSSLINE (21)                                      | b2b5°b9b12°b16°y7°y8y9°y16°y21                           |

| Precursor MH+ (Da) | z    | MH+ Error (ppm) | Score  | Start | End | Sequence                                               | Modifications                                                                                                 | BY Matches                                                                          |
|--------------------|------|-----------------|--------|-------|-----|--------------------------------------------------------|---------------------------------------------------------------------------------------------------------------|-------------------------------------------------------------------------------------|
| 3026.484           | 3    | 1.7647          | 5.9603 | 58    | 82  | (R)LRAEGDGV<br>YTLNDEKQWV<br>NTVAGEK(L)                | AMADORI (2),<br>CEL (25)                                                                                      | b15b21b23°y2°y5°<br>y8*y19y24*y25                                                   |
| 3516.717           | 3.74 | 3.9829          | 6.0012 | 54    | 82  | (R)QFYRLRAE<br>GDGVYTLNDE<br>KQWVNTVAG<br>EK(L)        | CEL (19), CML<br>(29)                                                                                         | b1*b9y3y4°y11y2<br>5*y29                                                            |
| 3625.7605          | 4.05 | -2.7785         | 6.2734 | 73    | 102 | (K)QWVNTVA<br>GEKLPECEAVC<br>GKPKHPVDQV<br>QR(I)       | MODIC (10),<br>Carbamidomethy<br>l C (14),<br>Carbamidomethy<br>l C (18), CEL (20),<br>CML (22)               | b1b2b3*b6b6*b7<br>b7°b8*b10°b11*b<br>14°b16b21*b30y2<br>y8*y14y20y24y24<br>°y25°y28 |
| 3840.9812          | 3    | 0.3823          | 6.111  | 124   | 156 | (R)HGLTTGATL<br>ISDQWLLTTAK<br>NLFLNHSETAS<br>AK(D)    | CROSSLINE (20),<br>MOLD (33)                                                                                  | b14*b18*b19°b20<br>*b29y3°y4y17*y1<br>8y20*y23y24*                                  |
| 4329.175           | 3    | -0.6635         | 5.9476 | 250   | 286 | (K)CVVHYENS<br>TVPEKKNLTSP<br>VGVPILNEHT<br>FCAGLTK(Y) | Carbamidomethy<br>l C (1), FL-2H2O<br>(14),<br>Carbamidomethy<br>l C (32), MODIC<br>(37)                      | b4b6b13°b15°b16<br>b20y19y32                                                        |
| 4527.16            | 3.61 | -5.3742         | 6.5239 | 250   | 286 | (K)CVVHYENS<br>TVPEKKNLTSP<br>VGVPILNEHT<br>FCAGLTK(Y) | Carbamidomethy<br>l C (1), FL-1H2O<br>(13), PYRALINE<br>(14),<br>Carbamidomethy<br>l C (32),<br>PYRALINE (37) | b2b4b22b24*b27<br>*b28b32°y12°y14<br>y35                                            |

#### DIAB HYD

| Precursor MH+ (Da) | z    | MH+ Error (ppm) | Score  | Start | End | Sequence                                | Modifications                             | BY Matches                                        |
|--------------------|------|-----------------|--------|-------|-----|-----------------------------------------|-------------------------------------------|---------------------------------------------------|
| 1828.8925          | 2.59 | -1.0559         | 6.0332 | 212   | 227 | (K)DYIAPGRVG<br>YVSGWGR(N)              | MODIC (7), GH1<br>(16)                    | b4°b5°b6b6°b7°b8<br>b8°b13b13°b14°y<br>4y5°y8°y16 |
| 2283.0835          | 3    | 1.1203          | 6.0198 | 95    | 111 | (K)HPVDQVQR<br>IIGGSMDAK(G<br>)         | AMADORI (8),<br>AFGP (17)                 | b3b4b6°b10*b14*<br>y8°y12°y16°y17                 |
| 3026.486           | 3    | 4.1097          | 6.0791 | 58    | 82  | (R)LRAEGDGV<br>YTLNDEKQWV<br>NTVAGEK(L) | AMADORI (2),<br>MODIC (15),<br>MODIC (25) | b8b9b9°b11°b21y<br>7°y9*y10°y13y24y<br>25         |

| Precursor MH+ (Da) | z    | MH+ Error (ppm) | Score  | Start | End | Sequence                                                           | Modifications                                                                 | BY Matches                                                              |
|--------------------|------|-----------------|--------|-------|-----|--------------------------------------------------------------------|-------------------------------------------------------------------------------|-------------------------------------------------------------------------|
| 3121.5083          | 3.74 | 3.7257          | 5.9796 | 212   | 236 | (K)DYIAPGRVG<br>YVSGWGRNA<br>NFRFTDR(L)                            | MODIC (7),<br>MOLD (16),<br>AMADORI (25)                                      | b5b6b22*b24y2y5<br>°y9y11y12y18y25                                      |
| 3977.8962          | 3.44 | -0.0892         | 6.485  | 233   | 262 | (R)FTDRLKYV<br>MLPVADQDKC<br>VVHYENSTVPE<br>K(K)                   | FL-2H2O (6), FL-<br>2H2O (17),<br>Carbamidomethy<br>l C (18), FL-1H2O<br>(30) | b10°b11°b18b20b<br>21°b26y3y4y5°y7y<br>10y16y20*y20°y2<br>1y24°         |
| 5007.6577          | 3.57 | 8.1531          | 5.9795 | 124   | 168 | (R)HGLTTGATL<br>ISDQWLLTTAK<br>NLFLNHSETAS<br>AKDITPTLTLV<br>GK(N) | MODIC (20), CEL<br>(33), CML (45)                                             | b5b6°b7b9°b11b1<br>2°b15*b16*b20°b<br>21*b22b24b26*b<br>33*b41y3y12y44* |

### DIAB AMG

| Precursor MH+ (Da) | z    | MH+ Error (ppm) | Score  | Start | End | Sequence                                           | Modifications                                                                      | BY Matches                                                     |
|--------------------|------|-----------------|--------|-------|-----|----------------------------------------------------|------------------------------------------------------------------------------------|----------------------------------------------------------------|
| 3837.9033          | 4    | -8.7464         | 5.9896 | 112   | 143 | (K)GSFPWQAK<br>MISRHGLTTGA<br>TLISDQWLLTT<br>AK(N) | Oxidation M (9),<br>AMADORI (12),<br>FL-1H2O (32)                                  | b1b3°b10°b11*b1<br>2b13°b15*b22y4y<br>6y11y20°                 |
| 1492.7566          | 2    | 6.9907          | 5.8071 | 112   | 123 | (K)GSFPWQAK<br>MISR(H)                             | MODIC (8),<br>MOLD (12)                                                            | b8b9b9°b11y3y4°<br>y7*y10*y11*                                 |
| 1607.7301          | 2    | -2.4776         | 6.5136 | 83    | 94  | (K)LPECEAVCG<br>KPK(H)                             | Carbamidomethy<br>l C (4),<br>Carbamidomethy<br>l C (8), CML (10),<br>AMADORI (12) | b2b3b4°b5b8b10°<br>b12°y1y7y9y11y1<br>1°                       |
| 1623.7863          | 2    | -5.5259         | 5.9197 | 228   | 238 | (R)NANFRFTD<br>RLK(Y)                              | MOLD (5), MOLD<br>(9), FL-1H2O (11)                                                | b3b5*b8°b10*y1y<br>3y6y9°y11                                   |
| 1671.7926          | 2    | -1.6455         | 6.2381 | 219   | 232 | (R)VG YVSGW<br>GRNANFR(F)                          | MOLD (9), GH1<br>(14)                                                              | b3b5b7b11b13*y<br>11°y12y14                                    |
| 2375.3127          | 2.74 | -7.3085         | 6.3309 | 193   | 211 | (K)LKQRVLVTE<br>RVMPICLPSK(<br>D)                  | Carbamidomethy<br>l C (15),<br>PYRALINE (19)                                       | b1b2b3b17b18°y3<br>y3°y5°y6y7°y8y9y<br>12°y13y18y19            |
| 2950.4055          | 3    | -8.6666         | 6.0392 | 212   | 236 | (K)DYIAPGRVG<br>YVSGWGRNA<br>NFRFTDR(L)            | MODIC (16), GH1<br>(25)                                                            | b3°b4°b8b10°b20<br>b25b25°y3y6°y7°y<br>8y9°y12°y17*y20y<br>22* |
| 2972.4336          | 4    | -0.1245         | 6.0263 | 212   | 236 | (K)DYIAPGRVG<br>YVSGWGRNA<br>NFRFTDR(L)            | MOLD (7), MOLD<br>(21)                                                             | b2°b11b18°b22*y<br>2°y4y4°y8y9°y11y<br>11*                     |

**Q07456- Protein AMBP**

**CON**

| Precursor MH+ (Da) | z    | MH+ Error (ppm) | Score  | Start | End | Sequence                                               | Modifications                                                                      | BY Matches                                 |
|--------------------|------|-----------------|--------|-------|-----|--------------------------------------------------------|------------------------------------------------------------------------------------|--------------------------------------------|
| 2236.1543          | 3.61 | -2.8907         | 4.6763 | 149   | 165 | (K)LYGREPQLR<br>DSSLQEFK(D)                            | FL-1H20 (17)                                                                       | b8b8*b9b9*b10b<br>11y5y9y9*y13*y<br>17     |
| 2475.078           | 3.5  | 2.8871          | 4.3309 | 331   | 348 | (K)ECKEYCGVP<br>GDGYEELIR(S)                           | Carbamidomethyl<br>C (2), CROSSLINE<br>(3),<br>Carbamidomethyl<br>C (6), MOLD (18) | b1b1°b2b2°b10y<br>4°y5y10y11°y18           |
| 2971.4226          | 4    | 5.7215          | 4.3897 | 19    | 42  | (R)ADPASTLPD<br>IQVQENFSESRI<br>YGK(W)                 | AMADORI (20), FL-<br>1H20 (24)                                                     | b3°b4b5b10b13b<br>21b24*y7y8°y12<br>*      |
| 4248.303           | 2    | -5.0516         | 4.9271 | 149   | 184 | (K)LYGREPQLR<br>DSSLQEFKDVA<br>LNVGISENSIIF<br>MPDR(G) | MODIC (4), MOLD<br>(36)                                                            | b3b10b18b23°y2<br>y3y5°y10*y18y24<br>*y26° |

**DIAB**

| Precursor MH+ (Da) | z    | MH+ Error (ppm) | Score  | Start | End | Sequence                                        | Modifications                                                                                     | BY Matches                                                    |
|--------------------|------|-----------------|--------|-------|-----|-------------------------------------------------|---------------------------------------------------------------------------------------------------|---------------------------------------------------------------|
| 1498.7476          | 2.55 | -3.1686         | 4.613  | 100   | 110 | (K)TDIDGKFLYH<br>K(S)                           | AMADORI (6)                                                                                       | b2b4°b5b7°b10y<br>11                                          |
| 1974.8545          | 2.05 | 8.8433          | 4.4404 | 321   | 333 | (K)GNGNKFYSE<br>KECK(E)                         | AFGP (10),<br>Carbamidomethyl C<br>(12), FL-1H20 (13)                                             | b6°b8°b9°b12y7<br>y9°y11y13                                   |
| 2332.2405          | 2.83 | 0.2423          | 5.1035 | 204   | 225 | (R)RAVLPEQSE<br>GSGTEPLITGTL<br>K(K)            | MOLD (1)                                                                                          | b8b14°b21°y3y3°<br>y11y12y15°y16y1<br>8*y22                   |
| 3121.5203          | 3.7  | 4.7387          | 5.4084 | 60    | 86  | (K)DKMSVSTLV<br>LQEGATEEISM<br>TSTRWR(R)        | Oxidation M (3),<br>MOLD (25)                                                                     | b1b1°b3b4°b5b1<br>1b12b13*b15°b2<br>2b22°y19*y23y2<br>7       |
| 1600.8225          | 2    | -3.3173         | 5.0268 | 100   | 112 | (K)TDIDGKFLYH<br>KSK(W)                         | MOLD (13)                                                                                         | b2°b3b5b6b7°b8<br>°b11°b13y3y6y7                              |
| 3497.6582          | 3.43 | -4.4341         | 5.2361 | 297   | 325 | (R)AFIKLWAFD<br>AAQGKCIQFHY<br>GGCKGNGNK(F<br>) | FL-2H2O (4),<br>Carbamidomethyl C<br>(15),<br>Carbamidomethyl C<br>(23), MODIC (24),<br>MOLD (29) | b2b12b15*b23y2<br>y5y8y8*y10y10*<br>y13*y14y19y22             |
| 3625.7627          | 4.06 | 0.3764          | 5.5227 | 58    | 86  | (R)IKDKMSVSTL<br>VLQEGATEEIS<br>MTSTRWR(R)      | AFGP (2), CML (4)                                                                                 | b10b10°b11b16b<br>18b20°b29y5y8°y<br>15y19*y20°y23y<br>24y27* |

| Precursor MH+ (Da) | z    | MH+ Error (ppm) | Score  | Start | End | Sequence                                               | Modifications                                   | BY Matches                                                         |
|--------------------|------|-----------------|--------|-------|-----|--------------------------------------------------------|-------------------------------------------------|--------------------------------------------------------------------|
| 2079.9507          | 4    | 1.1846          | 5.4478 | 43    | 57  | (K)WYNLAVGST<br>CPWLSR(I)                              | Carbamidomethyl C (10), AFGP (15)               | b2b3b9b10b15b15°y1y5y5°y9y12y13*y13°                               |
| 2173.029           | 2.06 | 2.2655          | 5.1374 | 185   | 201 | (R)GECVPGDRE<br>VEPTSIAR(A)                            | Carbamidomethyl C (3), CROSSLINE (8), MOLD (17) | b3b5°b6°b9°b10b12°b15°b16y3y4y9y13y17                              |
| 3083.4973          | 2.94 | -2.8266         | 5.4082 | 62    | 87  | (K)MSVSTLVQ<br>EGATETEISMTS<br>TRWRR(G)                | Oxidation M (1), MOLD (25), MOLD (26)           | b6°b7b9b11b11*b12*b14b15°b24*y1y4y5°y7y13y14°y19°y22y22*y25y25°y26 |
| 3783.8054          | 3    | -0.7643         | 5.4608 | 60    | 87  | (K)DKMSVSTLV<br>LQEGATETEISM<br>TSTRWRR(G)             | AFGP (25), CROSSLINE (27), MOLD (28)            | b2°b3b4°b5b9°b12*b15°b20°b25*y4y10°y13°y14y17°y22y23               |
| 4161.1646          | 5.2  | 3.3548          | 5.1665 | 6     | 42  | (R)TLFLLTACLA<br>SRADPASTLPDI<br>QVQENFSESRIY<br>GK(W) | Carbamidomethyl C (9), MODIC (33)               | b5°b21b28y3y8y17*y37                                               |

#### DIAB HYD

| Precursor MH+ (Da) | z    | MH+ Error (ppm) | Score  | Start | End | Sequence                      | Modifications                                                        | BY Matches                           |
|--------------------|------|-----------------|--------|-------|-----|-------------------------------|----------------------------------------------------------------------|--------------------------------------|
| 1973.8544          | 2.02 | -3.4292         | 4.7196 | 311   | 325 | (K)CIQFHYGGC<br>KGNGNK(F)     | Carbamidomethyl C (1), Carbamidomethyl C (9), CEL (10), AMADORI (15) | b3b10b10*b12y5y12*y15                |
| 1991.8833          | 2.75 | -0.4223         | 5.2098 | 311   | 325 | (K)CIQFHYGGC<br>KGNGNK(F)     | Carbamidomethyl C (1), Carbamidomethyl C (9), CROSSLINE (10)         | b5b9b13*b14y10y13*y15*               |
| 1994.947           | 2.81 | 4.0537          | 4.8915 | 85    | 99  | (R)WRRGVCEE<br>ITGAYQK(T)     | IMIDAZOLONEB (2), Carbamidomethyl C (6)                              | b1b3b13b15°y2y3y7°y8°y12*y14°y15y15* |
| 2312.2007          | 2    | -1.2216         | 5.1489 | 149   | 165 | (K)LYGREPQLR<br>DSLLQEFK(D)   | AMADORI (4), CML (17)                                                | b5°b10y9*y11*y12*y16                 |
| 2495.1912          | 2    | 8.7909          | 4.8431 | 87    | 105 | (R)RGVCEEITG<br>AYQKTDIDGK(F) | MOLD (1), Carbamidomethyl C (4), AFGP (13), MODIC (19)               | b3b8°b12b14b14°y4y5y7y9*y10*y12y13*  |

| Precursor MH+ (Da) | z | MH+ Error (ppm) | Score  | Start | End | Sequence                                        | Modifications                                                                         | BY Matches                                      |
|--------------------|---|-----------------|--------|-------|-----|-------------------------------------------------|---------------------------------------------------------------------------------------|-------------------------------------------------|
| 2707.4277          | 3 | 1.2934          | 4.9146 | 136   | 157 | (K)KSSHHHGLT<br>ITAKLYGREPQ<br>LR(D)            | MODIC (1),<br>IMIDAZOLONEB<br>(22)                                                    | b2°b7°b11°b12b1<br>8°b19y4y5*y8*y<br>10y16*y18* |
| 3315.6228          | 6 | -2.8987         | 4.9746 | 58    | 84  | (R)IKDKMSVST<br>LVLQEGATETE<br>ISMTSTR(W)       | CROSSLINE (2),<br>PYRALINE (4)                                                        | b3b6°b7b13°b14<br>°b20*y3y7y9y11y<br>14°y16°y23 |
| 3497.6592          | 4 | -1.5085         | 4.8376 | 297   | 325 | (R)AFIKLWAFD<br>AAQGKCIQFH<br>YGGCKGNGNK<br>(F) | MOLD (4),<br>AMADORI (14),<br>Carbamidomethyl<br>C (15),<br>Carbamidomethyl<br>C (23) | b3b10°b13*y3y5<br>*y9y10*y19                    |

### DIAB AMG

| Precursor MH+ (Da) | z    | MH+ Error (ppm) | Score  | Start | End | Sequence                              | Modifications                                                            | BY Matches                                                     |
|--------------------|------|-----------------|--------|-------|-----|---------------------------------------|--------------------------------------------------------------------------|----------------------------------------------------------------|
| 1971.9456          | 2    | 1.2895          | 5.4381 | 43    | 57  | (K)WYNLAVGS<br>TCPWLSR(I)             | Carbamidomethyl<br>C (10), AMADORI<br>(15)                               | b2b3*b5*b6b10*<br>b11b11*b13°b14<br>*y2°y4°y5°y6y8°y<br>14°    |
| 1991.8806          | 2.71 | -1.7778         | 6.0432 | 311   | 325 | (K)CIQFHYGGC<br>KNGNK(F)              | Carbamidomethyl<br>C (1),<br>Carbamidomethyl<br>C (9), CROSSLINE<br>(15) | b5b10°b12y1y3y<br>7y10*y11y12y15                               |
| 2332.2383          | 2.94 | 4.903           | 4.8779 | 204   | 225 | (R)RAVLPEESE<br>GSGTEPLITGTL<br>K(K)  | MOLD (22)                                                                | b9*b13°b14*b15<br>*b19b20b20*y3y<br>4y13y14y18*y20<br>°y21*y22 |
| 2443.0771          | 2.66 | -2.5247         | 5.2209 | 311   | 330 | (K)CIQFHYGGC<br>KNGNKFYSE<br>K(E)     | Carbamidomethyl<br>C (1),<br>Carbamidomethyl<br>C (9), MOLD (20)         | b4b12b13b15*y3<br>y3°y14*y18                                   |
| 2852.449           | 2    | 1.686           | 5.0887 | 88    | 110 | (R)GVCEEITGA<br>YQKTDIDGKFL<br>YHK(S) | Carbamidomethyl<br>C (3), MODIC (12),<br>MODIC (18),<br>PYRALINE (23)    | b3b5°b14b16y3y<br>4y6y14°                                      |
| 1745.8915          | 3    | 1.0447          | 5.3057 | 297   | 310 | (R)AFIKLWAFD<br>AAQK(C)               | PYRALINE (4), CEL<br>(14)                                                | b2b10°b14y3*y4<br>y5*y6°y11*y13y1<br>4                         |
| 1853.9392          | 2.26 | -2.3687         | 5.3124 | 297   | 310 | (R)AFIKLWAFD<br>AAQK(C)               | FL-1H20 (4), FL-<br>1H20 (14)                                            | b3b9b12°y8*y9y<br>9°y12y14                                     |
| 1901.9175          | 2.95 | -1.374          | 5.5877 | 85    | 99  | (R)WRRGVCEE<br>ITGAYQK(T)             | MOLD (2),<br>Carbamidomethyl<br>C (6)                                    | b8b9b14y1y2*y6<br>y8°y11y12y12*y1<br>5                         |

**P07759- Serine protease inhibitor A3K****CON**

| Precursor MH+ (Da) | z    | MH+ Error (ppm) | Score  | Start | End | Sequence                                | Modifications                  | BY Matches                                                          |
|--------------------|------|-----------------|--------|-------|-----|-----------------------------------------|--------------------------------|---------------------------------------------------------------------|
| 1895.926           | 2.61 | -0.5711         | 6.0825 | 177   | 192 | (K)NLINDYVSN QTQGMIK(E)                 | CML (16)                       | b1b5*b13y6°y10°                                                     |
| 1981.958           | 2.7  | -3.0088         | 6.9217 | 177   | 192 | (K)NLINDYVSN QTQGMIK(E)                 | FL-1H20 (16)                   | b6°b8°b11b13b14b14°b16b16*y2y8*y12°y13y13*y15*y16y16*               |
| 3517.6963          | 4    | -1.5928         | 6.81   | 323   | 350 | (R)LEEDVLPE MGIVEVFTEQ ADLSGITETK(K)    | FL-1H20 (12), CROSSLINE (28)   | b1b2°b3°b6°b8b11b17b19b19°b21y5°y6y9°y10°y12y16y17°y19*y20*y23*y26° |
| 1950.982           | 2.93 | 5.4111          | 6.4133 | 283   | 297 | (R)MQQVEASL QPETLRK(W)                  | MOLD (14), FL-1H20 (15)        | b3*b7b10y6y6°y10y14y15y15*                                          |
| 2011.9781          | 2.86 | -1.4282         | 6.4749 | 335   | 351 | (K)EVFTEQADL SGITETKK(L)                | CML (16), CML (17)             | b4b11y2y4°y12*y17                                                   |
| 2267.0618          | 2    | -3.7617         | 6.5506 | 158   | 176 | (R)ALYQTEAFT ADFQQPTEAK(N)              | PYRALINE (19)                  | b2b8b8*b10b11°b13°y3y3°y5y10*y14°                                   |
| 3440.6316          | 4    | 0.0281          | 6.8758 | 323   | 350 | (R)LEEDVLPE MGIVEVFTEQ ADLSGITETK(K)    | AFGP (12), MOLD (28)           | b2°b3b9°b10b12°b15°b17°b21*b22°y2y3°y4°y10y20y26*                   |
| 3625.7583          | 3    | -4.6821         | 6.6753 | 323   | 350 | (R)LEEDVLPE MGIVEVFTEQ ADLSGITETK(K)    | CROSSLINE (12), CROSSLINE (28) | b3b4b16b20*b25y2°y3y14                                              |
| 3665.8174          | 3.7  | 5.5685          | 6.7883 | 125   | 155 | (S)LSQPEDQD QINIGNAMFIE KDLQLAEFHE K(T) | Oxidation M (16), MODIC (31)   | b3b4b4°b5°b14*b15*b17*b18b21°b23*b23°b31y5y19°y21y21°y31            |

**DIAB**

| Precursor MH+ (Da) | z    | MH+ Error (ppm) | Score  | Start | End | Sequence                       | Modifications           | BY Matches                                       |
|--------------------|------|-----------------|--------|-------|-----|--------------------------------|-------------------------|--------------------------------------------------|
| 1950.9797          | 2.9  | -2.0119         | 6.7753 | 283   | 297 | (R)MQQVEASL QPETLRK(W)         | MOLD (14), FL-1H20 (15) | b3*b7b9b10b14°b15y7°y8y15                        |
| 2767.4988          | 3.73 | 6.3682          | 6.8016 | 300   | 322 | (R)KTLFPSQIEE LNLPKFSIASNYR(L) | MODIC (15), MODIC (23)  | b1b12°b21y1y2y3y4y4°y5*y10*y12y19y19°y20°y23y23* |

| Precursor MH+ (Da) | z    | MH+ Error (ppm) | Score  | Start | End | Sequence                                   | Modifications                            | BY Matches                                           |
|--------------------|------|-----------------|--------|-------|-----|--------------------------------------------|------------------------------------------|------------------------------------------------------|
| 2834.3025          | 2.39 | -4.0885         | 6.9314 | 216   | 235 | (K)WKISFD PQDTFESEFYLD EK(R)               | CROSSLINE (2), CML (20)                  | b6°b9b11*b15b16°b16°y2y2°y6y9y12y13°y14y15°          |
| 2848.3176          | 2.47 | -2.2621         | 6.8133 | 216   | 235 | (K)WKISFD PQDTFESEFYLD EK(R)               | CROSSLINE (2), CEL (20)                  | b3b8°b12y3y4y7°y8y8°y10°y12°y15y18y20y20*            |
| 2950.4111          | 3    | -2.2788         | 7.1274 | 214   | 236 | (K)GKWKISFD PQDTFESEFYLD EK(R)             | MODIC (2), MOLD (4)                      | b10°b11b18°b20°y9°y10y12y15*y20y20°y21y23            |
| 2972.402           | 3    | -1.1642         | 6.9452 | 214   | 236 | (K)GKWKISFD PQDTFESEFYLD EK(R)             | MOLD (2), CML (22)                       | b4b5b18*b19b20°b22°b23°y4y7y12y17y22y23              |
| 3390.6047          | 3    | 0.1261          | 6.9069 | 218   | 244 | (K)ISFD PQDTFESEFYLD EKRS VKVPMMK(M)       | Oxidation M (25), PYRALINE (27)          | b3b8°b12b13°b14°b15°b21b22°b23°y2y3y15y20y27         |
| 3699.817           | 3.56 | -2.2612         | 6.9487 | 323   | 351 | (R)LEEDVLPE MGIVKVFTEQ ADLSGITETKK(L)      | CROSSLINE (12), MODIC (28), AMADORI (29) | b5°b7b8°b10°b11b19°b20b25°b29y1y13*y19y20°y22y22*y29 |
| 4176.9937          | 4.68 | -8.2777         | 6.6393 | 125   | 157 | (S)LSQPEDQD QINIGNAMFIE KDLQILAEFHE KTR(A) | FL-1H20 (20), AMADORI (31)               | b1b9b11*b12°b14b15°b15°b22°b24y7y8y13*y15y18y22*y33  |

### DIAB HYD

| Precursor MH+ (Da) | z    | MH+ Error (ppm) | Score  | Start | End | Sequence                       | Modifications           | BY Matches                                             |
|--------------------|------|-----------------|--------|-------|-----|--------------------------------|-------------------------|--------------------------------------------------------|
| 1895.918           | 2.66 | 0.6476          | 6.941  | 177   | 192 | (K)NLINDYVSN QTQGMK(E)         | CML (16)                | b1b4°b5°b7°b8b13°b14°y2y3y8°y9y12y13y16                |
| 2116.0217          | 2.03 | -9.4493         | 6.8472 | 335   | 351 | (K)EVFTEQADL SGITETKK(L)       | CML (16), AMADORI (17)  | b4b6b7b7°b8b8°b12°b13°b14b14°b15b17y4°y5°y6y11°y17     |
| 2767.4922          | 3.71 | 4.0195          | 6.9118 | 300   | 322 | (R)KTLFPSQIEE LNLPKFSIASNYR(L) | MODIC (15), MODIC (23)  | b6°b17b17°b19°b21b23y1y3y5y5°y7y7°y9°y10y15°y15°y19y23 |
| 2834.3232          | 2.43 | -0.7045         | 6.6185 | 216   | 235 | (K)WKISFD PQDTFESEFYLD EK(R)   | CROSSLINE (2), CML (20) | b7b8b12°b19y2y3°y5y6°y7°y10y20                         |



| Precursor MH+ (Da) | z    | MH+ Error (ppm) | Score  | Start | End | Sequence                                         | Modifications                 | BY Matches                                                  |
|--------------------|------|-----------------|--------|-------|-----|--------------------------------------------------|-------------------------------|-------------------------------------------------------------|
| 2950.4045          | 2.54 | 1.9658          | 7.02   | 214   | 236 | (K)GKWKISFD<br>PQDTFESEFYI<br>DEKR(S)            | MODIC (2), MOLD (4)           | b3b7°b9°b12°b15<br>b15°b16°b20b22<br>b23y4°y7y13°y20<br>y23 |
| 3701.8184          | 4.56 | 4.893           | 6.9425 | 125   | 155 | (S)LSQPEDQD<br>QINIGNAMFIE<br>KDLQLAEFHE<br>K(T) | Oxidation M (16),<br>CEL (31) | b3b6b11°b12°b1<br>5y4y26°                                   |

### DIAB AMG

| Precursor MH+ (Da) | z    | MH+ Error (ppm) | Score  | Start | End | Sequence                                                                   | Modifications                                                             | BY Matches                                                        |
|--------------------|------|-----------------|--------|-------|-----|----------------------------------------------------------------------------|---------------------------------------------------------------------------|-------------------------------------------------------------------|
| 1790.9062          | 2    | -8.7526         | 6.3172 | 240   | 251 | (K)VPMMKMK<br>LLTR(H)                                                      | AFGP (5), CEL (7)                                                         | b1b4b7b8b10y2y<br>11°y12                                          |
| 2311.214           | 2    | 6.2634          | 6.6461 | 283   | 299 | (R)MQQVEASL<br>QPETLRKWR(K<br>)                                            | AMADORI (14),<br>MOLD (15)                                                | b3b5b6b6°b7°b9<br>°b13°b15y13y17                                  |
| 2474.1067          | 2.84 | 1.3754          | 6.8713 | 218   | 236 | (K)ISFDPQDTF<br>ESEFYI DEKR(S<br>)                                         | PYRALINE (18)                                                             | b3b3°b4°b7°b9*<br>b10°b14b19°b19<br>°y3°y7°y11°y15°y<br>17y19y19* |
| 2767.496           | 4    | 5.3564          | 6.2865 | 300   | 322 | (R)KTLFPSQIEE<br>LNLPKFSIASNY<br>R(L)                                      | MODIC (1),<br>MODIC (15)                                                  | b21°b22°y1y4°y7<br>y12y22°y23                                     |
| 3517.6914          | 3.74 | -2.9858         | 6.8843 | 323   | 350 | (R)LEEDVLPE<br>MGIKEVFTEQ<br>ADLSGITETK(K<br>)                             | FL-1H20 (12),<br>CROSSLINE (28)                                           | b1b12b19y4y11y<br>14y17°y21°y28                                   |
| 3684.9517          | 3    | -4.7211         | 6.6976 | 63    | 93  | (K)LALKNPDT<br>NIVFSPLSISAA<br>LALVSLGAKGK<br>(T)                          | AFGP (4), AFGP<br>(29), MODIC (31)                                        | b1b7b9b10°b23b<br>25b31°y7°y19y2<br>5                             |
| 3994.9553          | 3    | -1.3212         | 6.7688 | 252   | 282 | (R)HFRDEELSC<br>SVLELKYTGNA<br>SALLILPDQGR(<br>M)                          | MOLD (3),<br>Carbamidomethyl<br>C (9), CROSSLINE<br>(15), AMADORI<br>(31) | b4°b5°b6b7°b11<br>b23y5y13y22                                     |
| 5871.8115          | 4    | -2.3792         | 6.6745 | 94    | 144 | (K)TMEEILEGL<br>KFNLTPEDI<br>HQQFGNLLQS<br>LSQPEDQDQI<br>NIGNAMFIEK(<br>D) | FL-2H2O (51)                                                              | b5b12°b23b26°y<br>1y2°y3y17                                       |

| P29699- Alpha 2 HS glycoprotein |      |                 |        |       |     |                                        |                                                                              |                                                                                        |
|---------------------------------|------|-----------------|--------|-------|-----|----------------------------------------|------------------------------------------------------------------------------|----------------------------------------------------------------------------------------|
| CON                             |      |                 |        |       |     |                                        |                                                                              |                                                                                        |
| Precursor MH+ (Da)              | z    | MH+ Error (ppm) | Score  | Start | End | Sequence                               | Modifications                                                                | BY Matches                                                                             |
| 2755.2168                       | 3.98 | 8.0193          | 6.6653 | 121   | 143 | (K)QDGQFRV<br>MHTQCHSTPD<br>SAEDVR(K)  | MGH1 (6),<br>Carbamidomethyl<br>C (12)                                       | b2*b3b9°b10°b12°<br>b15°b17b19*b20°<br>b22y6°y7y10°y12y21y22°y23                       |
| 2879.2417                       | 2.74 | 0.8262          | 6.754  | 121   | 143 | (K)QDGQFRV<br>MHTQCHSTPD<br>SAEDVR(K)  | Oxidation M (8),<br>Carbamidomethyl<br>C (12), AMADORI<br>(23)               | b3b4b8°b9°b13b13°<br>b16°b18y8y11°y23                                                  |
| 2905.3577                       | 2.44 | 8.181           | 6.254  | 226   | 248 | (K)QHGFCKAN<br>LMHNLGGEEV<br>SVACK(L)  | Carbamidomethyl<br>C (5), AFGP (6),<br>Carbamidomethyl<br>C (22), MOLD (23)  | b4b6b12*b13b14y3y5y11°y12y13°<br>y23                                                   |
| 2987.2957                       | 2.5  | -2.3754         | 6.056  | 121   | 143 | (K)QDGQFRV<br>MHTQCHSTPD<br>SAEDVR(K)  | Oxidation M (8),<br>Carbamidomethyl<br>C (12), AFGP (23)                     | b5b5°b6°b8*b11°<br>b19°y4°y10y13°y15y15°y20°                                           |
| DIAB                            |      |                 |        |       |     |                                        |                                                                              |                                                                                        |
| Precursor MH+ (Da)              | z    | MH+ Error (ppm) | Score  | Start | End | Sequence                               | Modifications                                                                | BY Matches                                                                             |
| 1472.7932                       | 2    | 5.9331          | 6.4677 | 58    | 67  | (K)QVLNQIDK<br>VK(V)                   | FL-1H2O (8), FL-1H2O (10)                                                    | b3*b4*b5*b6y4y6°<br>y7°y8y10                                                           |
| 2453.1995                       | 2    | -0.1617         | 6.2651 | 212   | 231 | (K)EVTDPKAC<br>NLLAEKQHGF<br>CK(A)     | Carbamidomethyl<br>C (8), MODIC (14),<br>Carbamidomethyl<br>C (19), CEL (20) | b2b2°b4b5b6b7°<br>b8b8°b18y1y4y8y9y9°y10°y14°y17°<br>y20                               |
| 2490.321                        | 2.85 | 7.6473          | 6.7999 | 323   | 345 | (K)VGQPGAAG<br>PVSPMCPGRIR<br>HFKI(-)  | Carbamidomethyl<br>C (14), CML (22)                                          | b4b5b5*b7b7*b11b12°<br>b12°b13b13b13°<br>b22*b23y3y8y10y11y12y15y17°<br>y18y21*y22*y23 |
| 2755.2178                       | 4.03 | 8.346           | 6.2896 | 121   | 143 | (K)QDGQFRV<br>MHTQCHSTPD<br>SAEDVR(K)  | MGH1 (6),<br>Carbamidomethyl<br>C (12)                                       | b3b10b13b23y6°<br>y9y9°y10°y11y14°<br>y21°y22°y23                                      |
| 2995.305                        | 2.86 | -4.8365         | 6.4999 | 121   | 144 | (K)QDGQFRV<br>MHTQCHSTPD<br>SAEDVRK(L) | Carbamidomethyl<br>C (12), GH1 (23),<br>FL-2H2O (24)                         | b1b5*b7b10°b11°<br>b12°b13b15°b17b17°<br>b21*y6°y8y10°y12y17°y18y24                    |
| 3045.3853                       | 2.56 | 9.5291          | 6.1083 | 121   | 144 | (K)QDGQFRV<br>MHTQCHSTPD<br>SAEDVRK(L) | MGH1 (6),<br>Carbamidomethyl<br>C (12), AMADORI<br>(23)                      | b2*b4b9b10b10°<br>b11b12b13°b18b21y9y10y11°y15°<br>y17y20*y22*y23                      |

| Precursor MH+ (Da) | z | MH+ Error (ppm) | Score  | Start | End | Sequence                                                | Modifications                                                                                                             | BY Matches                                                       |
|--------------------|---|-----------------|--------|-------|-----|---------------------------------------------------------|---------------------------------------------------------------------------------------------------------------------------|------------------------------------------------------------------|
| 4459.1177          | 3 | -0.7176         | 6.2817 | 212   | 248 | (K)EVTDPAKC<br>NLLAEKQHGF<br>CKANLMHNLG<br>GEEVSVACK(L) | Carbamidomethyl C (8), CROSSLINE (14),<br>Carbamidomethyl C (19), MODIC (20), Oxidation M (24),<br>Carbamidomethyl C (36) | b2b4°b5b6b6°b1<br>0b15°b17°b19b1<br>9°b25y3y4y12*y<br>14*y16°y20 |

#### DIAB HYD

| Precursor MH+ (Da) | z    | MH+ Error (ppm) | Score  | Start | End | Sequence                           | Modifications                                                               | BY Matches                                                    |
|--------------------|------|-----------------|--------|-------|-----|------------------------------------|-----------------------------------------------------------------------------|---------------------------------------------------------------|
| 1749.8577          | 2.47 | -1.4596         | 6.718  | 212   | 225 | (K)EVTDPAKC<br>NLLAEK(Q)           | FL-2H2O (7),<br>Carbamidomethyl C (8), MODIC (14)                           | b1b1°b2b3b4°b5<br>b5°b6b7b7°b12b<br>14y4y6°y8*y11*y<br>12°y14 |
| 2538.231           | 2    | -1.2741         | 6.4537 | 212   | 231 | (K)EVTDPAKC<br>NLLAEKQHGF<br>CK(A) | FL-1H2O (7),<br>Carbamidomethyl C (8), MOLD (14),<br>Carbamidomethyl C (19) | b1°b2b4°b5°b6b<br>15y2y5y8*y13°y1<br>5                        |

#### DIAB AMG

| Precursor MH+ (Da) | z    | MH+ Error (ppm) | Score  | Start | End | Sequence                               | Modifications                                                         | BY Matches                                                                             |
|--------------------|------|-----------------|--------|-------|-----|----------------------------------------|-----------------------------------------------------------------------|----------------------------------------------------------------------------------------|
| 1923.8691          | 2.32 | 0.9455          | 6.6226 | 219   | 231 | (K)CNLLAEKQ<br>HGFK(A)                 | Carbamidomethyl C (1), AFGP (7),<br>Carbamidomethyl C (12), MOLD (13) | b4b6°b8b13y5y6<br>y8y11                                                                |
| 2603.2654          | 4    | 6.1238          | 6.5355 | 323   | 344 | (K)VGQPGAAG<br>PVSPMCPGRIR<br>HFK(I)   | Carbamidomethyl C (14),<br>IMIDAZOLONEB (17),<br>IMIDAZOLONEB (19)    | b1b2b3°b4°b5b7<br>b8b10b12b14b19<br>b21°b22*y1y2y7<br>y20°                             |
| 2755.2205          | 4.04 | 9.2897          | 6.4277 | 121   | 143 | (K)QDGQFRV<br>MHTQCHSTPD<br>SAEDVR(K)  | MGH1 (6),<br>Carbamidomethyl C (12)                                   | b6°b8°b10b13°b<br>22°y5y9y11y13y1<br>5°y19*y20*y23                                     |
| 2995.298           | 2.86 | -2.5934         | 6.5714 | 121   | 144 | (K)QDGQFRV<br>MHTQCHSTPD<br>SAEDVRK(L) | Carbamidomethyl C (12), GH1 (23),<br>FL-2H2O (24)                     | b4b5b8°b10°b12<br>°b13°b17b17°b2<br>1b22b22*y4°y6y<br>6°y12°y15°y16y1<br>6°y20*y20°y21 |

**P02088- Hemoglobin subunit beta 1**

**CON**

| Precursor MH+ (Da) | z    | MH+ Error (ppm) | Score  | Start | End | Sequence                              | Modifications                                    | BY Matches                                      |
|--------------------|------|-----------------|--------|-------|-----|---------------------------------------|--------------------------------------------------|-------------------------------------------------|
| 2495.1938          | 2    | -4.0917         | 6.1766 | 10    | 31  | (K)AAVSLWGVK<br>VNSDEVGG<br>ALGR(L)   | Carbamidomethyl C (5), CML (9), AMADORI (22)     | b2b4°b13°b15°b16°b19y1y7y12y19*y20y22           |
| 2538.1848          | 3    | -1.2864         | 6.2277 | 1     | 18  | (- )MVHLTDAEK<br>AAVSLWGVK(V)         | AFGP (9), Carbamidomethyl C (14), CROSSLINE (18) | b4b6°b9b15y18                                   |
| 2052.9265          | 2.7  | -1.5073         | 6.4317 | 42    | 60  | (R)YFDSFGDLS<br>SASAIMGNAK(V)         | CEL (19)                                         | b8b12°b15b15°b16°y5y9°y12°y14y14*y15y15*y16*y19 |
| 2218.0435          | 2.88 | -3.8616         | 6.2151 | 1     | 18  | (- )MVHLTDAEK<br>AAVSLWGVK(V)         | FL-1H2O (9), Carbamidomethyl C (14), CML (18)    | b2b4b10b11°b12b14°b15°y2y11°y13°                |
| 2990.4812          | 2.87 | 3.6428          | 6.1329 | 19    | 41  | (K)VNSDEVGG<br>EALGRLLVVYP<br>WTQR(Y) | AFGP (13), AMADORI (23)                          | b3*b4*b7b8b12°b12°b13y8y14*y22                  |

**DIAB**

| Precursor MH+ (Da) | z    | MH+ Error (ppm) | Score  | Start | End | Sequence                                          | Modifications                                    | BY Matches                             |
|--------------------|------|-----------------|--------|-------|-----|---------------------------------------------------|--------------------------------------------------|----------------------------------------|
| 1864.9406          | 3    | -8.4006         | 6.0634 | 68    | 83  | (K)VITAFNDGL<br>NHLDSLK(G)                        | PYRALINE (16)                                    | b1b3°b5°b10b11b13b15y3y8°y10           |
| 2088.917           | 3    | -8.3107         | 5.4434 | 42    | 60  | (R)YFDSFGDLS<br>SASAIMGNAK(V)                     | PYRALINE (19)                                    | b14y3*y9°y10°y12                       |
| 2538.1992          | 2.78 | -0.145          | 6.4333 | 1     | 18  | (- )MVHLTDAEK<br>AAVSLWGVK(V)                     | AFGP (9), Carbamidomethyl C (14), CROSSLINE (18) | b3b7b11°b13°b15b18y12y13y16y18         |
| 3836.921           | 4    | 2.0016          | 6.4988 | 10    | 41  | (K)AAVSLWGVK<br>VNSDEVGG<br>ALGRLLVVYP<br>WTQR(Y) | Carbamidomethyl C (5), AFGP (22), MODIC (32)     | b2b3b13b28°b30°y2y5*y6y7y13y20y20*y21° |
| 2368.138           | 2    | 1.2915          | 6.1782 | 42    | 62  | (R)YFDSFGDLS<br>SASAIMGNAK<br>VK(A)               | Oxidation M (15), FL-1H <sub>2</sub> O (21)      | b3°b6b15y5y7*y12°y13y17*               |

| DIAB HYD           |      |                 |        |       |     |                                           |                                                                     |                                                                   |
|--------------------|------|-----------------|--------|-------|-----|-------------------------------------------|---------------------------------------------------------------------|-------------------------------------------------------------------|
| Precursor MH+ (Da) | z    | MH+ Error (ppm) | Score  | Start | End | Sequence                                  | Modifications                                                       | BY Matches                                                        |
| 1456.71            | 2    | 9.8304          | 6.1303 | 122   | 133 | (K)DFTPAAQA AFQK(V)                       | AMADORI (12)                                                        | b3°y5y9y9*y11y12                                                  |
| 2495.193           | 2    | -9.0608         | 5.7246 | 10    | 31  | (K)AAVSCLWG KVNSDEVGGE ALGR(L)            | Carbamidomethyl C (5), CML (9), AMADORI (22)                        | b6°b10b13*b17°b20°b21°y6y10°y11y12y19*y20°                        |
| 3238.6106          | 3.06 | -2.1088         | 6.2212 | 68    | 96  | (K)VITAFNDGL NHLDSLKGTFA SLSELHCDK(L)     | MODIC (16), Carbamidomethyl C (27)                                  | b3b6*b7*b8*b9°b12*b13°b14b16°b21b25b25*b28°b29y1y2y5°y8°y10y15y18 |
| 3836.9043          | 4    | -2.2988         | 5.9875 | 10    | 41  | (K)AAVSCLWG KVNSDEVGGE ALGRLLVVYP WTQR(Y) | Carbamidomethyl C (5), AFGP (9), MODIC (22)                         | b4b8°b9b13b15b18y2y4*y6*y7y9*y32                                  |
| DIAB AMG           |      |                 |        |       |     |                                           |                                                                     |                                                                   |
| Precursor MH+ (Da) | z    | MH+ Error (ppm) | Score  | Start | End | Sequence                                  | Modifications                                                       | BY Matches                                                        |
| 3238.6084          | 3    | 2.108           | 6.2047 | 68    | 96  | (K)VITAFNDGL NHLDSLKGTFA SLSELHCDK(L)     | MODIC (16), Carbamidomethyl C (27)                                  | b3b7b11°b12b20°b21b23b27b28y3°y4y5y5°y11y12°y25°                  |
| 3497.6626          | 3.73 | -1.4176         | 6.4987 | 1     | 31  | (- )MVHLTDAEK AAVSCLWGKV NSDEVGGEAL GR(L) | FL-2H2O (9), Carbamidomethyl C (14), CEL (18)                       | b1b3b4b9b10b12°b15°b19b23°b26*y1y3y5°y14y15y18°y19y24°y26y27      |
| 3518.7097          | 4    | -0.3229         | 6.0062 | 67    | 96  | (K)KVITAFNDG LNHLDSLKGTFA SLSELHCDK(L)    | CEL (1), CML (17), Carbamidomethyl C (28), CML (30)                 | b7°b10b14*y3°y14°y20y23y25                                        |
| 3816.894           | 3    | 0.9903          | 6.3761 | 10    | 41  | (K)AAVSCLWG KVNSDEVGGE ALGRLLVVYP WTQR(Y) | Carbamidomethyl C (5), FL-1H <sub>2</sub> O (9), IMIDAZOLONE B (32) | b4°b6°b10°b14°b16°y5y6y20y22*                                     |

**P22599- Alpha 1 antitrypsin 1 2**

| <b>CON</b>         |      |                 |        |       |     |                                                                            |                                                                    |                                                         |
|--------------------|------|-----------------|--------|-------|-----|----------------------------------------------------------------------------|--------------------------------------------------------------------|---------------------------------------------------------|
| Precursor MH+ (Da) | z    | MH+ Error (ppm) | Score  | Start | End | Sequence                                                                   | Modifications                                                      | BY Matches                                              |
| 2311.2192          | 2    | 1.0945          | 5.9531 | 193   | 211 | (K)ELDQDTVFL<br>ALANYILFKGK(W)                                             | FL-2H <sub>2</sub> O (19)                                          | b4b4*b5*b7*b10b14b17°y2y12*                             |
| 2502.1287          | 3.32 | -5.9659         | 6.0722 | 154   | 173 | (K)NHYQAEVFL<br>SVNFAESEEAK(K(V))                                          | FL-2H <sub>2</sub> O (19),<br>MOLD (20)                            | b10*b14*b18*y3y5y7°y8°y13y17y18°y20*                    |
| 2606.2126          | 5    | -5.0215         | 6.3382 | 214   | 235 | (K)KPFDPENTE<br>EAEFHVDKSTTVK(V)                                           | CML (17)                                                           | b11*b14*b15*b15°b16y18y19y21                            |
| 2704.2295          | 2.38 | -4.3957         | 6.1147 | 214   | 235 | (K)KPFDPENTE<br>EAEFHVDKSTTVK(V)                                           | MOLD (1), MOLD (17),<br>CML (22)                                   | b3b7b9b12b14b14°b16*y4°y5°y12y15                        |
| 2975.382           | 3    | 4.1383          | 6.2972 | 214   | 235 | (K)KPFDPENTE<br>EAEFHVDKSTTVK(V)                                           | FL-2H <sub>2</sub> O (1),<br>CROSSLINE (17),<br>MOLD (22)          | b5°b10*b11b12b12*b13b14b15y18                           |
| 6050.8936          | 4    | 0.3054          | 6.2978 | 236   | 287 | (K)VPMMMLSG<br>MLDVHHCISLSSWVLLMDY<br>AGNASAVFLLP<br>EDGKMQHLE<br>QTLNK(E) | Carbamidomethyl C (15),<br>FL-1H <sub>2</sub> O (42),<br>MOLD (52) | b14b18°b21y2*y21*y25*y33y41                             |
| <b>DIAB</b>        |      |                 |        |       |     |                                                                            |                                                                    |                                                         |
| Precursor MH+ (Da) | z    | MH+ Error (ppm) | Score  | Start | End | Sequence                                                                   | Modifications                                                      | BY Matches                                              |
| 1578.804           | 2    | -0.5997         | 6.172  | 174   | 186 | (K)VINDFVEK<br>GTQGK(I)                                                    | FL-1H <sub>2</sub> O (8)                                           | b2b4b4*b10b10°y3*y5y5*y6°y11y13                         |
| 2325.0378          | 2    | -5.0438         | 6.213  | 154   | 172 | (K)NHYQAEVFL<br>SVNFAESEEAK(K)                                             | FL-2H <sub>2</sub> O (19)                                          | b4*b5b9b14*b19y4y10y14°y15°y18°y19                      |
| 2632.3225          | 2.89 | -0.714          | 6.3011 | 174   | 192 | (K)VINDFVEK<br>GTQGKIVEAVK(E)                                              | AFGP (8), FL-2H <sub>2</sub> O (13),<br>AMADORI (19)               | b1b5b5*b8*b10b11b11*b16y3y4y7°y9°y16°y19                |
| 2890.288           | 2.43 | -6.7791         | 6.5184 | 214   | 235 | (K)KPFDPENTE<br>EAEFHVDKSTTVK(V)                                           | FL-2H <sub>2</sub> O (1),<br>PYRALINE (17),<br>PYRALINE (22)       | b3b4b6b10°b12*b14b14*b19y3y4y7y8y10°y12y13y14°          |
| 3440.622           | 4    | 1.8002          | 6.4781 | 148   | 173 | (K)FLEEAKNHY<br>QAEVFSVNFAESEEAKK(V)                                       | CROSSLINE (6),<br>CEL (25), CEL (26)                               | b3b3°b5b7*b8°b11*b14°b15*b16*b19°b21b23y4y4°y6°y8y11y21 |

| <b>DIAB HYD</b>           |          |                        |              |              |            |                                                              |                                                        |                                                                       |
|---------------------------|----------|------------------------|--------------|--------------|------------|--------------------------------------------------------------|--------------------------------------------------------|-----------------------------------------------------------------------|
| <b>Precursor MH+ (Da)</b> | <b>z</b> | <b>MH+ Error (ppm)</b> | <b>Score</b> | <b>Start</b> | <b>End</b> | <b>Sequence</b>                                              | <b>Modifications</b>                                   | <b>BY Matches</b>                                                     |
| 1578.8008                 | 2        | 0.3165                 | 6.4383       | 174          | 186        | (K)VINDFVEK<br>GTQGK(I)                                      | MODIC (8),<br>PYRALINE (13)                            | b4b4*b6b7b9°b12<br>y3y4°y6°y8y8°y13                                   |
| 1692.8784                 | 2        | -3.6745                | 6.4979       | 173          | 186        | (K)KVINDFVEK<br>GTQGK(I)                                     | CEL (9), CML (14)                                      | b10b10*b11°b12*<br>b13*y11°y12y14                                     |
| 2311.214                  | 2        | -2.4504                | 6.6045       | 193          | 211        | (K)ELDQDTVF<br>ALANYILFKGK(W)                                | FL-2H <sub>2</sub> O (17)                              | b2b4b4*b7*b12°b<br>13°b14b18*y1y4y1<br>7y18°y19                       |
| 2346.2864                 | 3        | -2.1925                | 6.0882       | 173          | 192        | (K)KVINDFVEK<br>GTQGKIVEAV<br>K(E)                           | FL-1H <sub>2</sub> O (20)                              | b4b6b7°b16*y1y7°<br>y19*y20                                           |
| <b>DIAB AMG</b>           |          |                        |              |              |            |                                                              |                                                        |                                                                       |
| <b>Precursor MH+ (Da)</b> | <b>z</b> | <b>MH+ Error (ppm)</b> | <b>Score</b> | <b>Start</b> | <b>End</b> | <b>Sequence</b>                                              | <b>Modifications</b>                                   | <b>BY Matches</b>                                                     |
| 2860.5068                 | 2.63     | 1.7241                 | 6.2977       | 329          | 354        | (R)IFNNGADLS<br>GITEENAPLKL<br>SKAVHK(A)                     | MODIC (19), CML<br>(22)                                | b1b2b5*b9*b11°b<br>13b16b20b20*b24<br>y1y13°y15°y16°y26               |
| 1335.6862                 | 2        | -<br>10.3113           | 6.1513       | 144          | 153        | (K)LVEKFLEEA<br>K(N)                                         | CEL (4), CML (10)                                      | b1b3b5y3y4y5°y10                                                      |
| 2089.9539                 | 2        | -2.9736                | 6.1618       | 214          | 230        | (K)KFPDPENTE<br>EAEFHVDK(S)                                  | CML (17)                                               | b4°b8b12b14b16y<br>3y7y10y11*                                         |
| 2311.2136                 | 2        | -5.8378                | 6.327        | 193          | 211        | (K)ELDQDTVF<br>ALANYILFKGK(W)                                | FL-2H <sub>2</sub> O (17)                              | b1°b2b4*b5°b7*b1<br>0*b13b13°b14b15<br>b17*b19*y1y5y8y<br>11y13       |
| 3497.6487                 | 3.69     | 1.0035                 | 6.2953       | 210          | 235        | (K)GKWKKPFD<br>PENTEAEFHV<br>DKSTTVK(V)                      | AFGP (2), FL-<br>1H <sub>2</sub> O(21), MODIC<br>(26)  | b3b13b15*b17b19<br>b19*b20*y5y13y1<br>8y19                            |
| 3976.879                  | 3.49     | 0.2916                 | 6.4221       | 144          | 173        | (K)LVEKFLEEA<br>KNHYQAEVFS<br>VNFAESEEAKK<br>(V)             | AFGP (10), FL-<br>1H <sub>2</sub> O (29), MOLD<br>(30) | b5b11*b16°b19*b<br>20b20*b21b21°b2<br>2b23°b25*b28y9y<br>13y15y17y17* |
| 4671.4307                 | 6        | -2.0848                | 6.2704       | 309          | 350        | (R)LSISGDYNL<br>KTLMSPLGITRI<br>FNNGADLSGIT<br>EENAPLKLSK(A) | MODIC (10), CEL<br>(39), CEL (42)                      | b1b9°b11b21b22y<br>1y6y13y19*y26°y3<br>8*                             |

**P01837- Ig kappa chain C region**

**CON**

| Precursor MH+ (Da) | z    | MH+ Error (ppm) | Score  | Start | End | Sequence                                            | Modifications                                        | BY Matches                                                 |
|--------------------|------|-----------------|--------|-------|-----|-----------------------------------------------------|------------------------------------------------------|------------------------------------------------------------|
| 3231.4841          | 3    | 6.4184          | 6.0658 | 48    | 75  | (R)QNGVLNS<br>WTDQDSKDST<br>YSMSSTLTLTK(D)          | Oxidation M (20),<br>PYRALINE (28)                   | b4b11b13°b18°b20°<br>b21°b23b24y2°y5<br>y6°y13°y16°y22y23° |
| 3925.7556          | 3    | 0.0183          | 6.312  | 48    | 80  | (R)QNGVLNS<br>WTDQDSKDST<br>YSMSSTLTLTK<br>DEYER(H) | FL-2H <sub>2</sub> O (14)                            | b15°b16b22b26°y<br>3y13y19y21                              |
| 4556.0806          | 4.29 | 5.8103          | 6.1997 | 48    | 80  | (R)QNGVLNS<br>WTDQDSKDST<br>YSMSSTLTLTK<br>DEYER(H) | CROSSLINE (14),<br>CROSSLINE (28),<br>CROSSLINE (33) | b8b11b11°b13°b1<br>3°b15b18b19b23y<br>7°y9°y17y18°         |

**DIAB**

| Precursor MH+ (Da) | z | MH+ Error (ppm) | Score  | Start | End | Sequence                                  | Modifications                              | BY Matches                                            |
|--------------------|---|-----------------|--------|-------|-----|-------------------------------------------|--------------------------------------------|-------------------------------------------------------|
| 1901.9045          | 2 | 1.781           | 6.2094 | 92    | 106 | (K)TSTSPIVKSF<br>NRNEC(-)                 | AMADORI (12),<br>Carbamidomethyl<br>C (15) | b2°b3°b5b11b14y4<br>y5y9*                             |
| 2309.945           | 2 | -4.7213         | 6.1437 | 76    | 91  | (K)DEYERHNS<br>YTCEATHK(T)                | AFGP (5),<br>Carbamidomethyl<br>C (11)     | b10b11b12°b13b1<br>3°b14°y7                           |
| 3390.6055          | 3 | 3.3542          | 6.2388 | 35    | 61  | (K)DINVKWKI<br>DGSERQNGVL<br>NSWTDQDSK(D) | CML (7),<br>IMIDAZOLONEB<br>(13), CML (27) | b1°b4°b6°b12b12°<br>b13b14°b17°b26°y<br>3y4y6y10°y19* |

**DIAB HYD**

| Precursor MH+ (Da) | z | MH+ Error (ppm) | Score  | Start | End | Sequence                                            | Modifications                                            | BY Matches                                              |
|--------------------|---|-----------------|--------|-------|-----|-----------------------------------------------------|----------------------------------------------------------|---------------------------------------------------------|
| 1775.8577          | 2 | -4.233          | 5.9409 | 92    | 106 | (K)TSTSPIVKSF<br>NRNEC(-)                           | MODIC (8),<br>Carbamidomethyl<br>C (15)                  | b6y4°y7°y11y12°y<br>15                                  |
| 1937.921           | 3 | 6.2737          | 6.0329 | 92    | 106 | (K)TSTSPIVKSF<br>NRNEC(-)                           | MODIC (8),<br>AMADORI (12),<br>Carbamidomethyl<br>C (15) | b1b1°b2b2°b3°b4°<br>b5b7b11b13b14°y<br>9y10°y12*        |
| 3925.7693          | 3 | 3.4571          | 6.2843 | 48    | 80  | (R)QNGVLNS<br>WTDQDSKDST<br>YSMSSTLTLTK<br>DEYER(H) | CEL (28), MGH1<br>(33)                                   | b1°b5b15b16b17°<br>b21°b23°b27°y3y4<br>°y9y9°y11°y20y24 |



**DIAB AMG**

| <b>Precursor MH+ (Da)</b> | <b>z</b> | <b>MH+ Error (ppm)</b> | <b>Score</b> | <b>Start</b> | <b>End</b> | <b>Sequence</b>                                      | <b>Modifications</b>                        | <b>BY Matches</b>                                                  |
|---------------------------|----------|------------------------|--------------|--------------|------------|------------------------------------------------------|---------------------------------------------|--------------------------------------------------------------------|
| 1793.88                   | 2        | -1.1627                | 6.2433       | 35           | 47         | (K)DINVKWKI<br>DGSER(Q)                              | FL-2H <sub>2</sub> O (5),<br>PYRALINE (7)   | b4°b5b8b9*b10b12<br>°y4°y8y12*                                     |
| 2309.9436                 | 2        | -8.1865                | 6.3834       | 76           | 91         | (K)DEYERHNS<br>YTCEATHK(T)                           | AFGP (5),<br>Carbamidomethy<br>I C (11)     | b3b8b13°b15y3y7y<br>9y12°y13                                       |
| 4320.913                  | 3        | 3.3414                 | 6.5978       | 42           | 75         | (K)IDGSERQN<br>GVLNSWTDQ<br>DSKDSTYSMSS<br>TLTLTK(D) | AFGP (6),<br>Oxidation M<br>(26), AFGP (34) | b2°b4b5°b8b8*b10<br>b14°b17b17°b18b2<br>1b23b32*y11y17°y<br>20y28* |

**P01878- Ig alpha chain C region****CON**

| Precursor MH+ (Da) | z    | MH+ Error (ppm) | Score | Start | End | Sequence                                                          | Modifications                                           | BY Matches                                |
|--------------------|------|-----------------|-------|-------|-----|-------------------------------------------------------------------|---------------------------------------------------------|-------------------------------------------|
| 2032.04            | 2.86 | -0.8483         | 5.328 | 44    | 62  | (K)SGKDITTVNFPP<br>ALASGGR(Y)                                     | FL-1H <sub>2</sub> O (3)                                | b1°b3°b11b18y11*y19                       |
| 2445.21            | 3.4  | 2.8888          | 5.492 | 255   | 274 | (R)WLHGNEELSPE<br>SYLVFEPLK(E)                                    | CML (20)                                                | b2b4b5*b8*b13b15*b<br>16b20y10y12°y16*y20 |
| 4948.4             | 6    | -8.3222         | 5.339 | 1     | 43  | (-<br>)ESARNPTIYPLTLP<br>PALSSDPVIIGCLIH<br>DYFPSGTMNVTW<br>GK(S) | AMADORI (4),<br>Carbamidomet<br>hyl C (26), CML<br>(43) | b2°b9*b22°y6°y7y15y1<br>7y18*y19y21°      |

**DIAB**

| Precursor MH+ (Da) | z    | MH+ Error (ppm) | Score | Start | End | Sequence                                                           | Modifications                                                     | BY Matches                                                               |
|--------------------|------|-----------------|-------|-------|-----|--------------------------------------------------------------------|-------------------------------------------------------------------|--------------------------------------------------------------------------|
| 1655.81            | 2.71 | 4.5773          | 6.281 | 145   | 159 | (R)NPEGAVFTWEP<br>STGK(D)                                          | MODIC (15)                                                        | b9b10°b13y8y15                                                           |
| 2441.18            | 3.28 | -1.3871         | 6.442 | 145   | 165 | (R)NPEGAVFTWEP<br>STGKDAVQKK(A)                                    | MODIC (15),<br>CML (20), CML<br>(21)                              | b15b16*b18b20b21°y3<br>*y8*y12y12°y18y19°y2<br>1                         |
| 5453.63            | 4    | 5.1441          | 6.449 | 275   | 322 | (K)EPGEGATTYLVT<br>SVLRVSAETWKQG<br>DQYSCMVGHEALP<br>MNFTQKTIDR(L) | Carbamidomet<br>hyl C (30),<br>Oxidation M<br>(31), MODIC<br>(44) | b1°b3°b6b7b12°b14°b<br>25°y3y4y8*y9*y10°y11<br>*y11°y15°y21*y24*y26<br>* |

**DIAB HYD**

| Precursor MH+ (Da) | z    | MH+ Error (ppm) | Score | Start | End | Sequence                                                                  | Modifications                                                                                                         | BY Matches                                                                              |
|--------------------|------|-----------------|-------|-------|-----|---------------------------------------------------------------------------|-----------------------------------------------------------------------------------------------------------------------|-----------------------------------------------------------------------------------------|
| 4233.9             | 4.76 | 4.5601          | 6.423 | 160   | 194 | (K)DAVQKKAV<br>QNSCGCYSVS<br>SVLPGCAERW<br>NSGASFK(C)                     | AFGP (5), CML (6),<br>Carbamidomethyl<br>C (12),<br>Carbamidomethyl<br>C (14),<br>Carbamidomethyl<br>C (24), CML (35) | b3b3°b7*b23*b24<br>b32y3y3°y5y5°y6y<br>9°y10y11y15y20°y<br>20°y23y23*y26y34<br>°y35y35* |
| 5073.52            | 4    | 0.4844          | 5.804 | 255   | 297 | (R)WLHGNEEL<br>SPESYLVFEPLK<br>EPGEGATTYLV<br>TSVLRVSAET<br>WK(Q)         | AMADORI (36),<br>MOLD (43)                                                                                            | b8°b10°b13b31*b4<br>2*y4°y7y10y17                                                       |
| 5489.47            | 3.73 | -3.0052         | 6.387 | 298   | 344 | (K)QGDQYSC<br>MVGHEALPM<br>NFTQKTIDRLS<br>GKPTNVSVSVI<br>MSEGDGICY(-<br>) | Carbamidomethyl<br>C (7), MOLD (21),<br>AMADORI (25),<br>CML (29),<br>Carbamidomethyl<br>C (46)                       | b1*b4b6*b14b16b<br>17*b21b24°b40*y<br>5y12°y18y37*                                      |

**DIAB AMG**

| Precursor MH+ (Da) | z    | MH+ Error (ppm) | Score | Start | End | Sequence                            | Modifications                     | BY Matches                                              |
|--------------------|------|-----------------|-------|-------|-----|-------------------------------------|-----------------------------------|---------------------------------------------------------|
| 2415.25            | 2    | 9.7324          | 6.334 | 145   | 165 | (R)NPEGAVFT<br>WEPSTGKDAV<br>QKK(A) | FL-2H <sub>2</sub> O (20)         | b3°b9°b10*b11°b1<br>2°b21y6y6°y7y10°y<br>16°y20*y21y21* |
| 2441.18            | 3.56 | -1.6329         | 6.137 | 145   | 165 | (R)NPEGAVFT<br>WEPSTGKDAV<br>QKK(A) | MODIC (15), CML<br>(20), CML (21) | b14y3*y4*y8°y19*<br>y20y21                              |

| Precursor MH+ (Da) | z    | MH+ Error (ppm) | Score | Start | End | Sequence                                                         | Modifications                                                                                              | BY Matches                      |
|--------------------|------|-----------------|-------|-------|-----|------------------------------------------------------------------|------------------------------------------------------------------------------------------------------------|---------------------------------|
| 5052.27            | 3.86 | -1.3683         | 6.301 | 145   | 186 | (R)NPEGAVFT<br>WEPSTGKDAV<br>QKKAVQNSCG<br>CYSVSSVLPGC<br>AER(W) | AFGP (15), MOLD (20), AMADORI (21), Carbamidomethyl C (27), Carbamidomethyl C (29), Carbamidomethyl C (39) | b6*b14°b15b18b2<br>2*b25*y4°y27 |
